# Supplementary material
Source: Royal Society of Chemistry journal article supplement (doi:10.1039/d6ob00514d)
Supplement: d6ob00514d1.pdf [file d6ob00514d1.pdf]

## Supporting Information

### Base-Promoted Synthesis of $\alpha,\beta$ -Unsaturated Amides via C-N Bond Formation Using $\alpha,\beta$ -Unsaturated Acids and Isothiocyanates

Aditya Rai and Krishna Nand Singh\*

Department of Chemistry, Institute of Science, Banaras Hindu University, Varanasi-221005, India

\*E-mail: knsingh@bhu.ac.in; knsinghbhu@yahoo.co.in

### Table of Contents

|                                                                                                                                                 |                |
|-------------------------------------------------------------------------------------------------------------------------------------------------|----------------|
| <b>1. Physical and Spectral Data of the Products 3</b>                                                                                          | <b>S1-S9</b>   |
| <b>2. References</b>                                                                                                                            | <b>S10</b>     |
| <b>3. Copies of <math>^1\text{H}</math>, <math>^{13}\text{C}\{^1\text{H}\}</math>, and <math>^{19}\text{F}</math> Spectra of the Products 3</b> | <b>S11-S45</b> |
| <b>4. Copies of HRMS Spectra of the Unknown Products 3</b>                                                                                      | <b>S46-S50</b> |
| <b>5. HRMS Spectra of the Intermediate B</b>                                                                                                    | <b>S51</b>     |
| <b>6. HRMS Spectra of the Carbonyl Sulfide</b>                                                                                                  | <b>S51</b>     |
| <b>7. Crystallographic Data of the Product 3f</b>                                                                                               | <b>S52-S53</b> |
| <b>8. Procedure for Gram Scale Preparation of the Product 3a</b>                                                                                | <b>S54</b>     |

## 1. Physical and Spectral Data of the Products 3.

### *N*-Phenylcinnamamide (3a)<sup>1</sup>:

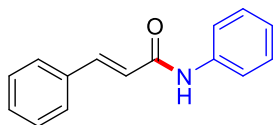

White solid; Yield = 102 mg (91%); Purification by column chromatography (ethyl acetate/hexane, v/v = 10:90); <sup>1</sup>H NMR (500 MHz, CDCl<sub>3</sub>): δ 8.64 (brs, 1H), 7.75 (d, *J* = 16.0 Hz, 2H), 7.70 (s, 1H), 7.38 (d, *J* = 7.5 Hz, 2H), 7.30-7.23 (m, 5H), 7.09 (t, *J* = 7.5 Hz, 1H), 6.74 (d, *J* = 16.0 Hz, 1H); <sup>13</sup>C {<sup>1</sup>H} NMR (126 MHz, CDCl<sub>3</sub>): δ 164.9, 142.2, 138.3, 134.7, 129.9, 129.1, 128.8, 128.0, 124.5, 121.3, 120.5.

### (*E*)-*N*-Phenyl-3-(*p*-tolyl)acrylamide (3b)<sup>1</sup>:

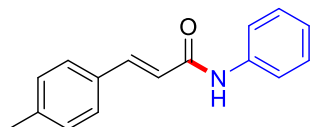

White solid; Yield = 108 mg (91%); Purification by column chromatography (ethyl acetate/hexane, v/v = 10:90); <sup>1</sup>H NMR (500 MHz, CDCl<sub>3</sub>): δ 7.78 (brs, 1H), 7.74 (d, *J* = 15.0 Hz, 1H), 7.65 (d, *J* = 6.0 Hz, 2H), 7.38 (d, *J* = 8.0 Hz, 2H), 7.33 (t, *J* = 8.0 Hz, 2H), 7.15-7.10 (m, 3H), 6.58 (d, *J* = 15.0 Hz, 1H), 2.36 (s, 3H); <sup>13</sup>C {<sup>1</sup>H} NMR (126 MHz, CDCl<sub>3</sub>): δ 164.5, 142.5, 140.4, 138.3, 132.0, 129.7, 129.2, 128.1, 124.5, 120.2, 120.0, 21.6.

### (*E*)-3-(4-Methoxyphenyl)-*N*-phenylacrylamide (3c)<sup>3</sup>:

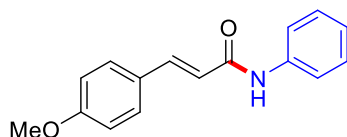

White solid; Yield = 117 mg (92%); Purification by column chromatography (ethyl acetate/hexane, v/v = 15:85); <sup>1</sup>H NMR (500 MHz, CDCl<sub>3</sub>): δ 7.77 (brs, 1H), 7.70 (d, *J* = 16.0 Hz, 1H), 7.62 (brs, 2H), 7.41 (d, *J* = 8.5 Hz, 2H), 7.31 (t, *J* = 7.5 Hz, 2H), 7.10 (t, *J* = 7.0 Hz, 1H), 6.85 (d, *J* = 8.5 Hz, 2H), 6.47 (d, *J* = 15.5 Hz, 1H), 3.80 (s, 3H); <sup>13</sup>C {<sup>1</sup>H} NMR (126 MHz, CDCl<sub>3</sub>): δ 164.8, 161.2, 142.2, 138.3, 129.7, 129.2, 127.5, 124.5, 120.2, 118.5, 114.4, 55.5.

### (*E*)-3-([1,1'-Biphenyl]-4-yl)-*N*-phenylacrylamide (3d)<sup>1</sup>:

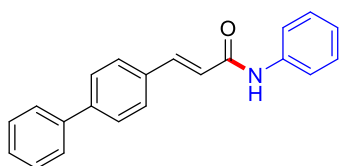

Light yellow solid; Yield = 112 mg (75%); Purification by column chromatography (ethyl acetate/hexane, v/v = 10:90); <sup>1</sup>H NMR (500 MHz, CDCl<sub>3</sub>): δ 7.82 (d, *J* = 15.5 Hz, 1H), 7.64-7.60 (m, 8H), 7.46 (t, *J* = 7.5 Hz, 2H), 7.42 (brs, 1H), 7.39 (q, *J* = 7.5 Hz, 3H), 7.14 (t, *J* = 7.5 Hz, 1H), 6.61 (d, *J* = 16.0 Hz, 1H);

$^{13}\text{C}\{^1\text{H}\}$  NMR (126 MHz,  $\text{CDCl}_3$ ):  $\delta$  164.1, 142.9, 142.2, 140.3, 138.2, 133.7, 129.2, 129.0, 128.6, 128.0, 127.7, 127.2, 124.6, 120.8, 120.1.

**(E)-3-(4-Fluorophenyl)-N-phenylacrylamide (3e)<sup>3</sup>:**

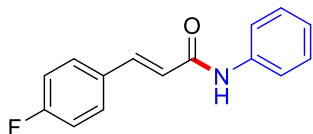

White solid; Yield = 105 mg (87%); Purification by column chromatography (ethyl acetate/hexane, v/v = 10:90);  $^1\text{H}$  NMR (500 MHz,  $\text{CDCl}_3$ ):  $\delta$  7.71 (d,  $J$  = 15.5 Hz, 2H), 7.63 (d,  $J$  = 8.0 Hz, 2H), 7.46-7.43 (m, 2H), 7.33 (t,  $J$  = 8.0 Hz, 2H), 7.13 (t,  $J$  = 7.5 Hz, 1H), 7.03 (t,  $J$  = 8.5 Hz, 2H), 6.52 (d,  $J$  = 15.0 Hz, 1H);  $^{13}\text{C}\{^1\text{H}\}$  NMR (126 MHz,  $\text{CDCl}_3$ ):  $\delta$  164.9, 164.2 (d,  $J$  = 165.3 Hz), 141.2, 138.3, 131.2 (d,  $J$  = 2.9 Hz), 129.9 (d,  $J$  = 8.3 Hz), 129.2, 124.7, 120.9, 120.5, 116.2 (d,  $J$  = 21.9 Hz);  $^{19}\text{F}$  NMR (471 MHz,  $\text{CDCl}_3$ ):  $\delta$  -110.2.

**(E)-3-(4-Chlorophenyl)-N-phenylacrylamide (3f)<sup>3</sup>:**

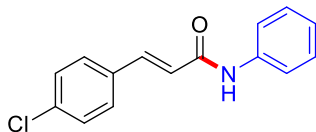

Light yellow solid; Yield = 114 mg (88%); Purification by column chromatography (ethyl acetate/hexane, v/v = 10:90);  $^1\text{H}$  NMR (500 MHz,  $\text{CDCl}_3$ ):  $\delta$  7.82 (brs, 1H), 7.69 (d,  $J$  = 15.5 Hz, 1H), 7.64 (d,  $J$  = 6.0 Hz, 2H), 7.38-7.29 (m, 6H), 7.13 (t,  $J$  = 7.0 Hz, 1H), 6.58 (d,  $J$  = 16.0 Hz, 1H);  $^{13}\text{C}\{^1\text{H}\}$  NMR (151 MHz,  $\text{CDCl}_3$ ):  $\delta$  163.9, 141.2, 138.1, 136.0, 133.2, 130.2, 129.3, 129.2, 124.7, 121.6, 120.2.

**(E)-3-(4-Bromophenyl)-N-phenylacrylamide (3g)<sup>1</sup>:**

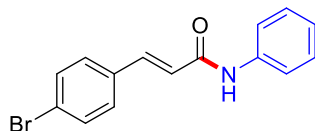

White solid; Yield = 129 mg (85%); Purification by column chromatography (ethyl acetate/hexane, v/v = 10:90);  $^1\text{H}$  NMR (500 MHz,  $\text{CDCl}_3$ ):  $\delta$  7.68 (d,  $J$  = 16.0 Hz, 1H), 7.61 (d,  $J$  = 7.0 Hz, 2H), 7.55 (brs, 1H), 7.50 (d,  $J$  = 7.5 Hz, 2H), 7.35-7.34 (m, 4H), 7.13 (t,  $J$  = 7.0 Hz, 1H), 6.56 (d,  $J$  = 15.0 Hz, 1H);  $^{13}\text{C}\{^1\text{H}\}$  NMR (151 MHz,  $\text{CDCl}_3$ ):  $\delta$  163.8, 141.3, 138.0, 133.7, 132.3, 129.5, 129.3, 124.7, 124.3, 121.6, 120.1.

**(E)-3-(3,4-Dichlorophenyl)-N-phenylacrylamide (3h):**

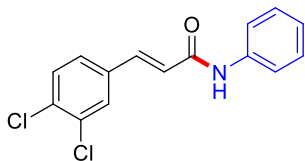

Light brown solid; Yield = 126 mg (86%); Purification by column chromatography (ethyl acetate/hexane, v/v = 10:90);  $^1\text{H}$  NMR (500 MHz,  $\text{CDCl}_3$ ):  $\delta$  7.84 (brs, 1H), 7.63 (s, 1H), 7.62 (d,  $J = 16.0$  Hz, 2H), 7.52 (s, 1H), 7.40 (d,  $J = 8.5$  Hz, 1H), 7.33 (t,  $J = 8.0$  Hz, 2H), 7.26 (d,  $J = 7.0$  Hz, 1H), 7.13 (t,  $J = 7.0$  Hz, 1H), 6.58 (d,  $J = 15.0$  Hz, 1H);  $^{13}\text{C}\{^1\text{H}\}$  NMR (126 MHz,  $\text{CDCl}_3$ ):  $\delta$  163.6, 139.9, 138.1, 135.1, 134.1, 133.5, 131.1, 129.6, 129.3, 127.2, 125.0, 123.1, 120.6. HRMS (ESI-TOF) m/z:  $[\text{M} + \text{H}]^+$  calcd for  $\text{C}_{15}\text{H}_{12}\text{Cl}_2\text{NO}^+$  292.0290; found 292.0288.

**(E)-3-(3-Methoxyphenyl)-N-phenylacrylamide (3i):**

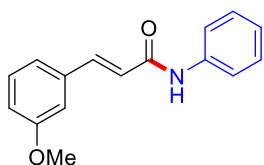

Colorless liquid; Yield = 107 mg (84%); Purification by column chromatography (ethyl acetate/hexane, v/v = 15:85);  $^1\text{H}$  NMR (500 MHz,  $\text{CDCl}_3$ ):  $\delta$  7.86 (brs, 1H), 7.72 (d,  $J = 15.5$  Hz, 1H), 7.65 (d,  $J = 6.5$  Hz, 2H), 7.32 (t,  $J = 8.0$  Hz, 2H), 7.25 (t,  $J = 8.0$  Hz, 1H), 7.12 (t,  $J = 7.5$  Hz, 1H), 7.08 (d,  $J = 7.5$  Hz, 1H), 6.99 (s, 1H), 6.91 (dd,  $J = 2.0$  Hz,  $J' = 2.0$  Hz, 1H), 6.61 (d,  $J = 15.5$  Hz, 1H), 3.78 (s, 3H);  $^{13}\text{C}\{^1\text{H}\}$  NMR (126 MHz,  $\text{CDCl}_3$ ):  $\delta$  164.3, 160.0, 142.4, 138.2, 136.1, 130.0, 129.2, 124.6, 121.4, 120.6, 120.2, 115.9, 113.2, 55.4. HRMS (ESI-TOF) m/z:  $[\text{M} + \text{H}]^+$  calcd for  $\text{C}_{16}\text{H}_{16}\text{NO}_2^+$  254.1176; found 254.1171.

**(E)-N-Phenyl-3-(3-(trifluoromethyl)phenyl)acrylamide (3j):**

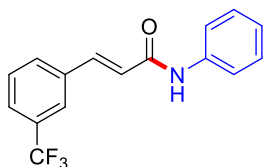

Yellow solid; Yield = 115 mg (79%); Purification by column chromatography (ethyl acetate/hexane, v/v = 10:90);  $^1\text{H}$  NMR (500 MHz,  $\text{CDCl}_3$ ):  $\delta$  8.03 (brs, 1H), 7.76 (d,  $J = 15.5$  Hz, 1H), 7.70 (s, 1H), 7.67 (d,  $J = 7.5$  Hz, 2H), 7.58 (d,  $J = 7.5$  Hz, 2H), 7.44 (t,  $J = 8.0$  Hz, 1H), 7.33 (t,  $J = 8.0$  Hz, 2H), 7.13 (t,  $J = 7.5$  Hz, 1H), 6.71 (d,  $J = 15.5$  Hz, 1H);  $^{13}\text{C}\{^1\text{H}\}$  NMR (126 MHz,  $\text{CDCl}_3$ ):  $\delta$  163.8, 140.7, 138.0, 135.5, 131.6, 131.3, 129.5, 129.2, 126.4 (d,  $J = 2.9$  Hz), 125.0, 124.8, 124.3 (d,  $J = 3.0$  Hz), 123.0, 122.8, 120.3;  $^{19}\text{F}$  NMR (471 MHz,  $\text{CDCl}_3$ ):  $\delta$  -62.7. HRMS

(ESI-TOF)  $m/z$ :  $[M + H]^+$  calcd for  $C_{16}H_{13}F_3NO^+$  292.0944; found 292.0944.

**(E)-N-Phenyl-3-(*o*-tolyl)acrylamide (3k)<sup>1</sup>:**

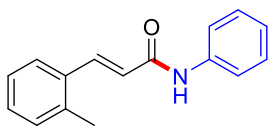

Light yellow solid; Yield = 103 mg (87%); Purification by column chromatography (ethyl acetate/hexane, v/v = 10:90); <sup>1</sup>H NMR (600 MHz, CDCl<sub>3</sub>): δ 8.06 (d,  $J$  = 12.5 Hz, 1H), 7.96 (brs, 1H), 7.68 (d,  $J$  = 5.5 Hz, 2H), 7.50 (d,  $J$  = 6.5 Hz, 1H), 7.33 (t,  $J$  = 7.0 Hz, 2H), 7.24 (t,  $J$  = 6.0 Hz, 1H), 7.18 (d,  $J$  = 6.0 Hz, 1H), 7.15-7.10 (m, 2H), 6.54 (d,  $J$  = 13.0 Hz, 1H), 2.38 (s, 3H); <sup>13</sup>C{<sup>1</sup>H} NMR (151 MHz, CDCl<sub>3</sub>): δ 164.5, 140.2, 138.3, 137.9, 133.7, 130.9, 129.8, 129.2, 126.3, 126.3, 124.5, 122.1, 120.2, 19.9.

**(E)-3-(2-Methoxyphenyl)-N-phenylacrylamide (3l)<sup>1</sup>:**

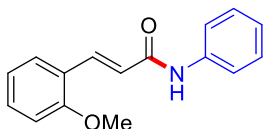

White solid; Yield = 115 mg (91%); Purification by column chromatography (ethyl acetate/hexane, v/v = 15:85); <sup>1</sup>H NMR (500 MHz, CDCl<sub>3</sub>): δ 8.28 (brs, 1H), 8.07 (d,  $J$  = 15.5 Hz, 1H), 7.71 (d,  $J$  = 7.0 Hz, 2H), 7.42 (d,  $J$  = 7.0 Hz, 1H), 7.31 (q,  $J$  = 8.0 Hz, 3H), 7.08 (t,  $J$  = 7.5 Hz, 1H), 6.85-6.83 (m, 2H), 6.82 (d,  $J$  = 15.5 Hz, 1H), 3.77 (s, 3H); <sup>13</sup>C{<sup>1</sup>H} NMR (126 MHz, CDCl<sub>3</sub>): δ 165.2, 158.7, 138.7, 137.7, 131.0, 129.1, 129.0, 124.3, 124.2, 122.1, 120.9, 120.5, 111.6, 55.6.

**(E)-3-(2-Chlorophenyl)-N-phenylacrylamide (3m):**

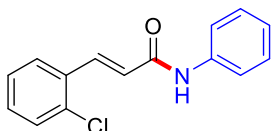

Yellow solid; Yield = 104 mg (81%); Purification by column chromatography (ethyl acetate/hexane, v/v = 12:88); <sup>1</sup>H NMR (500 MHz, CDCl<sub>3</sub>): δ 8.14 (d,  $J$  = 16.0 Hz, 1H), 7.65 (d,  $J$  = 7.0 Hz, 3H), 7.58 (d,  $J$  = 7.5 Hz, 1H), 7.42 (d,  $J$  = 8.0 Hz, 1H), 7.34 (t,  $J$  = 8.0 Hz, 2H), 7.29 (t,  $J$  = 7.0 Hz, 1H), 7.24 (t,  $J$  = 7.5 Hz, 1H), 7.13 (t,  $J$  = 7.5 Hz, 1H), 6.60 (d,  $J$  = 15.0 Hz, 1H); <sup>13</sup>C{<sup>1</sup>H} NMR (126 MHz, CDCl<sub>3</sub>): δ 163.7, 138.4, 138.0, 135.1, 133.1, 130.8, 130.4, 129.2, 127.8, 127.1, 124.7, 123.9, 120.1. HRMS (ESI-TOF)  $m/z$ :  $[M + H]^+$  calcd for  $C_{15}H_{13}ClNO^+$  258.0680; found 258.0676.

**(E)-N-Phenyl-3-(2-(trifluoromethyl)phenyl)acrylamide (3n):**

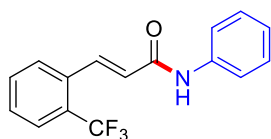

Light yellow solid; Yield = 108 mg (74%); Purification by column chromatography (ethyl acetate/hexane, v/v = 15:85);  $^1\text{H}$  NMR (500 MHz,  $\text{CDCl}_3$ ):  $\delta$  8.13 (d,  $J = 15.0$  Hz, 1H), 7.75 (brs, 1H), 7.70 (d,  $J = 7.5$  Hz, 1H), 7.64 (d,  $J = 6.5$  Hz, 3H), 7.51 (t,  $J = 7.5$  Hz, 1H), 7.45 (t,  $J = 7.5$  Hz, 1H), 7.33 (t,  $J = 7.5$  Hz, 2H), 7.12 (t,  $J = 7.0$  Hz, 1H), 6.56 (d,  $J = 15.5$  Hz, 1H);  $^{13}\text{C}\{^1\text{H}\}$  NMR (126 MHz,  $\text{CDCl}_3$ ):  $\delta$  163.4, 138.0 (d,  $J = 17.3$  Hz), 133.9, 132.1, 129.4, 129.2, 128.0, 126.4 (q,  $J = 4.8$  Hz), 125.6, 125.2, 124.8, 124.7 (q,  $J = 108.9$  Hz), 120.7, 120.2;  $^{19}\text{F}$  NMR (471 MHz,  $\text{CDCl}_3$ ):  $\delta$  -58.9. HRMS (ESI-TOF) m/z:  $[\text{M} + \text{H}]^+$  calcd for  $\text{C}_{16}\text{H}_{13}\text{F}_3\text{NO}^+$  292.0944; found 292.0939.

**(E)-3-(Naphthalen-1-yl)-N-phenylacrylamide (3o)<sup>3</sup>:**

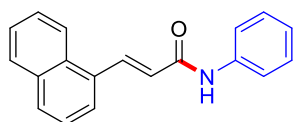

Light yellow solid; Yield = 97 mg (71%); Purification by column chromatography (ethyl acetate/hexane, v/v = 10:90);  $^1\text{H}$  NMR (500 MHz,  $\text{CDCl}_3$ ):  $\delta$  8.62 (d,  $J = 15.0$  Hz, 1H), 8.24 (d,  $J = 8.0$  Hz, 1H), 7.90-7.87 (m, 2H), 7.74 (d,  $J = 6.5$  Hz, 1H), 7.66 (s, 2H), 7.58-7.52 (m, 3H), 7.47 (t,  $J = 7.0$  Hz, 2H), 7.37 (t,  $J = 8.0$  Hz, 2H), 7.15 (t,  $J = 7.0$  Hz, 1H), 6.65 (d,  $J = 14.5$  Hz, 1H);  $^{13}\text{C}\{^1\text{H}\}$  NMR (126 MHz,  $\text{CDCl}_3$ ):  $\delta$  164.0, 139.9, 138.2, 133.8, 132.3, 131.7, 130.4, 129.3, 128.8, 127.0, 126.4, 125.5, 124.9, 124.7, 123.8, 120.1.

**(E)-3-(Furan-2-yl)-N-phenylacrylamide (3p)<sup>1</sup>:**

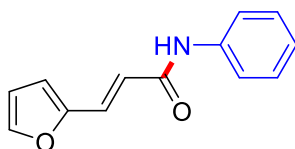

Light brown solid; Yield = 88 mg (83%); Purification by column chromatography (ethyl acetate/hexane, v/v = 12:88);  $^1\text{H}$  NMR (500 MHz,  $\text{CDCl}_3$ ):  $\delta$  8.17 (brs, 1H), 7.64 (d,  $J = 7.0$  Hz, 2H), 7.52 (d,  $J = 15.0$  Hz, 1H), 7.37 (s, 1H), 7.28 (t,  $J = 8.0$  Hz, 2H), 7.09 (t,  $J = 7.5$  Hz, 1H), 6.59 (d,  $J = 15.0$  Hz, 1H), 6.48 (d,  $J = 3.0$  Hz, 1H), 6.42 (d,  $J = 4.0$  Hz, 1H);  $^{13}\text{C}\{^1\text{H}\}$  NMR (126 MHz,  $\text{CDCl}_3$ ):  $\delta$  164.6, 151.3, 144.3, 138.3, 129.0, 128.9, 124.4, 120.3, 119.0, 114.4, 112.3.

**(E)-N-Phenyl-3-(thiophen-2-yl)acrylamide (3q)<sup>1</sup>:**

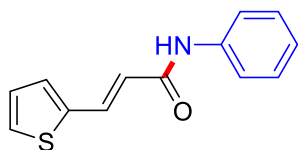

White solid; Yield = 100 mg (87%); Purification by column chromatography (ethyl acetate/hexane, v/v = 12:88); <sup>1</sup>H NMR (500 MHz, CDCl<sub>3</sub>): δ 8.06 (brs, 1H), 7.87 (d, *J* = 15.5 Hz, 1H), 7.65 (d, *J* = 7.0 Hz, 2H), 7.32-7.28 (m, 3H), 7.14 (d, *J* = 3.5 Hz, 1H), 7.10 (t, *J* = 7.5 Hz, 1H), 7.01-6.99 (m, 1H), 6.47 (d, *J* = 16.0 Hz, 1H); <sup>13</sup>C{<sup>1</sup>H} NMR (126 MHz, CDCl<sub>3</sub>): δ 164.3, 139.9, 138.2, 135.0, 130.8, 129.1, 128.2, 127.8, 124.5, 120.3, 120.0.

**(E)-N-Phenylbut-2-enamide (3r)<sup>4</sup>:**

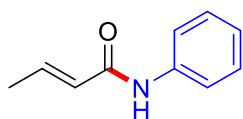

White solid; Yield = 64 mg (79%); Purification by column chromatography (ethyl acetate/hexane, v/v = 10:90); <sup>1</sup>H NMR (500 MHz, CDCl<sub>3</sub>): δ 7.74 (brs, 1H), 7.58 (d, *J* = 7.5 Hz, 2H), 7.30 (t, *J* = 8.0 Hz, 2H), 7.09 (t, *J* = 7.5 Hz, 1H), 7.00-6.93 (m, 1H), 6.01-5.97 (m, 1H), 1.87-1.86 (m, 3H); <sup>13</sup>C{<sup>1</sup>H} NMR (126 MHz, CDCl<sub>3</sub>): δ 164.4, 141.6, 138.2, 129.0, 125.6, 124.3, 120.2, 17.9.

**(E)-N-Phenyl-oct-2-enamide (3s):**

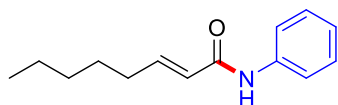

Brown oil; Yield = 77 mg (71%); Purification by column chromatography (ethyl acetate/hexane, v/v = 15:85); <sup>1</sup>H NMR (500 MHz, CDCl<sub>3</sub>): δ 7.58 (d, *J* = 7.0 Hz, 2H), 7.41 (brs, 1H), 7.31 (t, *J* = 8.0 Hz, 2H), 7.10 (t, *J* = 7.5 Hz, 1H), 7.01-6.95 (m, 1H), 5.95 (d, *J* = 14.5 Hz, 1H), 2.23 (q, *J* = 7.0 Hz, 2H), 1.49-1.44 (m, 2H), 1.32-1.29 (m, 4H), 0.90 (t, *J* = 7.0 Hz, 3H); <sup>13</sup>C{<sup>1</sup>H} NMR (126 MHz, CDCl<sub>3</sub>): δ 164.3, 146.8, 138.2, 129.1, 124.3, 124.0, 120.0, 32.2, 31.5, 28.0, 22.6, 14.1. HRMS (ESI-TOF) *m/z*: [M + H]<sup>+</sup> calcd for C<sub>14</sub>H<sub>20</sub>NO<sup>+</sup> 218.1539; found 218.1529.

**N-(4-Ethylphenyl)cinnamamide (3t)<sup>2</sup>:**

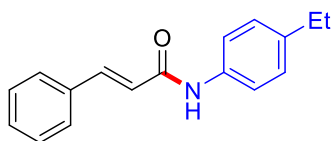

Yellow solid; Yield = 113 mg (90%); Purification by column chromatography (ethyl acetate/hexane, v/v = 10:90); <sup>1</sup>H NMR (500 MHz, CDCl<sub>3</sub>): δ 8.27 (brs, 1H), 7.74 (d, *J* = 16.0 Hz, 1H), 7.60 (d, *J* = 8.0 Hz, 2H), 7.42 (d, *J* = 8.0 Hz, 2H), 7.33-7.27 (m,

3H), 7.14 (d,  $J = 8.0$  Hz, 2H), 6.69 (d,  $J = 15.5$  Hz, 1H), 2.62 (q,  $J = 7.5$  Hz, 2H), 1.22 (t,  $J = 8.0$  Hz, 3H);  $^{13}\text{C}\{^1\text{H}\}$  NMR (126 MHz,  $\text{CDCl}_3$ ):  $\delta$  164.5, 142.0, 140.6, 135.9, 134.8, 129.9, 128.9, 128.4, 128.0, 121.3, 120.5, 28.4, 15.7.

#### ***N*-(4-(*Tert*-butyl)phenyl)cinnamamide (3u):**

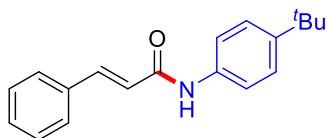

Light yellow solid; Yield = 127 mg (91%); Purification by column chromatography (ethyl acetate/hexane, v/v = 10:90);  $^1\text{H}$  NMR (500 MHz,  $\text{CDCl}_3$ ):  $\delta$  8.93 (brs, 1H), 7.75 (d,  $J = 16.0$  Hz, 1H), 7.69 (d,  $J = 8.5$  Hz, 2H), 7.36 (d,  $J = 7.5$  Hz, 2H), 7.32 (d,  $J = 8.0$  Hz, 2H), 7.28 (d,  $J = 7.5$  Hz, 1H), 7.24-7.19 (m, 2H), 6.82 (d,  $J = 16.0$  Hz, 1H), 1.28 (s, 9H);  $^{13}\text{C}\{^1\text{H}\}$  NMR (126 MHz,  $\text{CDCl}_3$ ):  $\delta$  164.9, 147.4, 141.9, 135.8, 134.8, 129.8, 128.8, 128.0, 125.9, 121.5, 120.4, 34.4, 31.4. HRMS (ESI-TOF)  $m/z$ :  $[\text{M} + \text{H}]^+$  calcd for  $\text{C}_{19}\text{H}_{22}\text{NO}^+$  280.1696; found 280.1686.

#### ***N*-(4-Methoxyphenyl)cinnamamide (3v)<sup>2</sup>:**

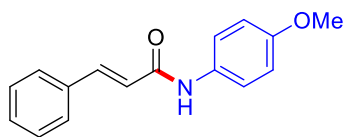

Light brown solid; Yield = 115 mg (91%); Purification by column chromatography (ethyl acetate/hexane, v/v = 15:85);  $^1\text{H}$  NMR (500 MHz,  $\text{CDCl}_3$ ):  $\delta$  7.81 (brs, 1H), 7.74 (d,  $J = 15.5$  Hz, 1H), 7.55 (d,  $J = 8.5$  Hz, 2H), 7.47-7.46 (m, 2H), 7.34-7.32 (m, 3H), 6.86 (d,  $J = 8.5$  Hz, 2H), 6.60 (d,  $J = 15.5$  Hz, 1H), 3.77 (s, 3H);  $^{13}\text{C}\{^1\text{H}\}$  NMR (126 MHz,  $\text{CDCl}_3$ ):  $\delta$  164.2, 156.6, 142.0, 134.8, 131.4, 130.0, 129.0, 128.0, 122.0, 121.2, 114.3, 55.6.

#### ***N*-(4-Fluorophenyl)cinnamamide (3w)<sup>2</sup>:**

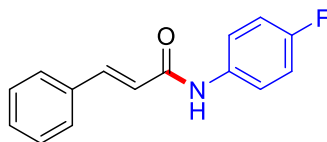

Light brown solid; Yield = 106 mg (88%); Purification by column chromatography (ethyl acetate/hexane, v/v = 10:90);  $^1\text{H}$  NMR (500 MHz,  $\text{CDCl}_3$ ):  $\delta$  7.88 (brs, 1H), 7.76 (d,  $J = 16.0$  Hz, 1H), 7.59 (brs, 2H), 7.47-7.46 (m, 2H), 7.35 (d,  $J = 7.0$  Hz, 3H), 7.01 (t,  $J = 9.0$  Hz, 2H), 6.61 (d,  $J = 16.0$  Hz, 1H);  $^{13}\text{C}\{^1\text{H}\}$  NMR (126 MHz,  $\text{CDCl}_3$ ):  $\delta$  164.3, 160.6 (d,  $J = 243.5$  Hz), 142.6, 134.6, 134.2, 130.2, 129.0, 128.1, 122.0 (d,  $J = 6.8$  Hz), 120.8, 115.9 (d,  $J = 22.3$  Hz);  $^{19}\text{F}$  NMR (471 MHz,  $\text{CDCl}_3$ ):  $\delta$  -117.6.

***N*-(3,5-Dimethylphenyl)cinnamamide (3x)<sup>6</sup>:**

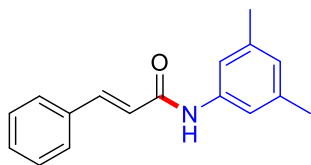

Yellow solid; Yield = 111 mg (88%); Purification by column chromatography (ethyl acetate/hexane, v/v = 10:90); <sup>1</sup>H NMR (500 MHz, CDCl<sub>3</sub>): δ 8.02 (brs, 1H), 7.75 (d, *J* = 15.0 Hz, 1H), 7.46 (d, *J* = 8.5 Hz, 2H), 7.33-7.31 (m, 5H), 6.75 (s, 1H), 6.66 (d, *J* = 15.5 Hz, 1H), 2.26 (s, 6H); <sup>13</sup>C{<sup>1</sup>H} NMR (126 MHz, CDCl<sub>3</sub>): δ 164.4, 142.1, 138.8, 138.1, 134.8, 129.9, 128.9, 128.0, 126.3, 121.3, 118.1, 21.4.

***N*-(3-Chlorophenyl)cinnamamide (3y)<sup>5</sup>:**

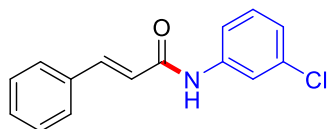

Yellow solid; Yield = 108 mg (84%); Purification by column chromatography (ethyl acetate/hexane, v/v = 10:90); <sup>1</sup>H NMR (500 MHz, CDCl<sub>3</sub>): δ 8.33 (brs, 1H), 7.77 (s, 1H), 7.75 (d, *J* = 15.0 Hz, 1H), 7.54 (d, *J* = 8.0 Hz, 1H), 7.42 (d, *J* = 7.5 Hz, 2H), 7.33-7.28 (m, 3H), 7.21 (t, *J* = 8.0 Hz, 1H), 7.08 (d, *J* = 8.0 Hz, 1H), 6.66 (d, *J* = 15.0 Hz, 1H); <sup>13</sup>C{<sup>1</sup>H} NMR (126 MHz, CDCl<sub>3</sub>): δ 164.8, 143.0, 139.4, 134.8, 134.5, 130.2, 130.1, 129.0, 128.1, 124.6, 120.6, 120.4, 118.4.

***N*-(3-(Trifluoromethyl)phenyl)cinnamamide (3z)<sup>5</sup>:**

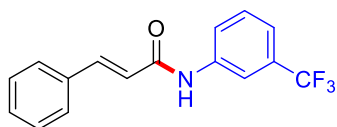

White solid; Yield = 118 mg (81%); Purification by column chromatography (ethyl acetate/hexane, v/v = 10:90); <sup>1</sup>H NMR (500 MHz, CDCl<sub>3</sub>): δ 8.54 (brs, 1H), 7.96 (s, 1H), 7.89 (d, *J* = 8.0 Hz, 1H), 7.78 (d, *J* = 16.0 Hz, 1H), 7.42 (d, *J* = 7.0 Hz, 2H), 7.38 (d, *J* = 8.0 Hz, 1H), 7.34-7.32 (m, 2H), 7.29 (t, *J* = 7.5 Hz, 2H), 6.70 (d, *J* = 15.0 Hz, 1H); <sup>13</sup>C{<sup>1</sup>H} NMR (126 MHz, CDCl<sub>3</sub>): δ 165.0, 143.3, 138.7, 134.4, 131.9 (q, *J* = 32.2 Hz), 130.3, 129.7, 129.0, 128.1, 127.2 (q, *J* = 272.9 Hz), 123.4, 122.9, 121.1, 120.5, 117.1; <sup>19</sup>F NMR (471 MHz, CDCl<sub>3</sub>): δ -62.6.

***N*-(*o*-Tolyl)cinnamamide (3aa)<sup>2</sup>:**

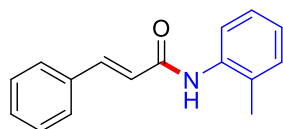

White solid; Yield = 102 mg (86%); Purification by column chromatography (ethyl acetate/hexane, v/v = 10:90); <sup>1</sup>H NMR (500 MHz, CDCl<sub>3</sub>): δ 7.94 (brs, 1H), 7.77 (d, *J* = 15.5 Hz, 1H), 7.52 (s, 2H), 7.37 (s, 3H), 7.28 (brs, 1H), 7.25-7.20 (m, 2H), 7.10

(brs, 1H), 6.62 (d,  $J = 15.0$  Hz, 1H), 2.31 (s, 3H);  $^{13}\text{C}\{^1\text{H}\}$  NMR (126 MHz,  $\text{CDCl}_3$ ):  $\delta$  164.4, 142.3, 135.9, 134.8, 130.6, 130.0, 128.9, 128.1, 126.8, 125.5, 123.6, 121.0, 18.0.

#### ***N*-Benzylcinnamamide (3ab):**

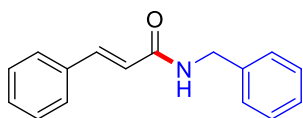

White solid; Yield = 101 mg (85%); Purification by column chromatography (ethyl acetate/hexane, v/v = 12:88);  $^1\text{H}$  NMR (500 MHz,  $\text{CDCl}_3$ ):  $\delta$  7.68 (d,  $J = 16.0$  Hz, 1H), 7.49-7.47 (m, 2H), 7.35-7.28 (m, 8H), 6.45 (d,  $J = 16.0$  Hz, 1H), 6.12 (brs, 1H), 4.56 (d,  $J = 5.5$  Hz, 2H);  $^{13}\text{C}\{^1\text{H}\}$  NMR (126 MHz,  $\text{CDCl}_3$ ):  $\delta$  166.1, 141.3, 138.3, 134.9, 129.8, 128.9, 128.8, 127.9, 127.9, 127.6, 120.7, 43.8. HRMS (ESI-TOF)  $m/z$ :  $[\text{M} + \text{H}]^+$  calcd for  $\text{C}_{16}\text{H}_{16}\text{NO}^+$  238.1226; found 238.1224.

#### ***N*-Phenethylcinnamamide (3ac):**

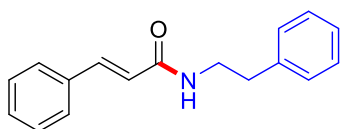

Light yellow solid; Yield = 99 mg (79%); Purification by column chromatography (ethyl acetate/hexane, v/v = 20:80);  $^1\text{H}$  NMR (500 MHz,  $\text{CDCl}_3$ ):  $\delta$  7.64 (d,  $J = 15.5$  Hz, 1H), 7.48 (dd,  $J = 3.5$  Hz,  $J' = 2.0$  Hz, 2H), 7.36-7.34 (m, 3H), 7.32 (d,  $J = 7.5$  Hz, 2H), 7.26-7.22 (m, 3H), 6.37 (d,  $J = 15.5$  Hz, 1H), 5.86 (brs, 1H), 3.68 (q,  $J = 7.0$  Hz, 2H), 2.90 (t,  $J = 7.0$  Hz, 2H);  $^{13}\text{C}\{^1\text{H}\}$  NMR (126 MHz,  $\text{CDCl}_3$ ):  $\delta$  166.0, 141.1, 139.0, 134.9, 129.8, 128.9, 128.8, 127.9, 126.7, 120.8, 41.0, 35.8. HRMS (ESI-TOF)  $m/z$ :  $[\text{M} + \text{H}]^+$  calcd for  $\text{C}_{17}\text{H}_{18}\text{NO}^+$  252.1383; found 252.1382.

#### ***N*-Cyclohexylcinnamamide (3ad):**

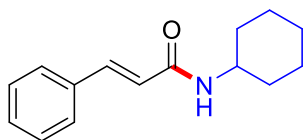

White solid; Yield = 89 mg (78%); Purification by column chromatography (ethyl acetate/hexane, v/v = 12:88);  $^1\text{H}$  NMR (500 MHz,  $\text{CDCl}_3$ ):  $\delta$  7.62 (d,  $J = 16.0$  Hz, 1H), 7.48-7.47 (m, 2H), 7.35-7.32 (m, 3H), 6.42 (d,  $J = 15.0$  Hz, 1H), 5.76 (d,  $J = 7.5$  Hz, 1H), 3.95-3.87 (m, 1H), 2.00-1.97 (m, 2H), 1.74-1.70 (m, 2H), 1.64-1.60 (m, 1H), 1.43-1.34 (m, 2H), 1.23-1.15 (m, 3H);  $^{13}\text{C}\{^1\text{H}\}$  NMR (126 MHz,  $\text{CDCl}_3$ ):  $\delta$  165.1, 140.7, 135.1, 129.6, 128.9, 127.8, 121.4, 48.5, 33.3, 25.7, 25.0. HRMS (ESI-TOF)  $m/z$ :  $[\text{M} + \text{H}]^+$  calcd for  $\text{C}_{15}\text{H}_{20}\text{NO}^+$  230.1539; found 230.1537.

## 2. References

1. B. K. Pandia, C. Gunanathan, *J. Org. Chem.* 2021, **86**, 9994–10005.
2. J. B. Peng, H. Q. Geng, D. Li, X. Qi, J. Ying, X. F. Wu, *Org. Lett.* 2018, **20**, 4988–4993.
3. S. Verma, V. Singh, J. L. Jat, B. Tiwari *J. Org. Chem.* 2024, **89**, 8201–8207.
4. R. -H. A, J. Zhang, X. -F. Wu, *Chem. Sci.* 2025, **16**, 22168–22173.
5. Y. Luo, X. Wang, Q. Liu, Y. He, J. Li, S. Luo, Q. Zhu, *Green Chem.* 2023, **25**, 1120–1127.
6. T. T. S. Lew, D. S. W. Lim, Y. Zhang, *Green Chem.* 2015, **17**, 5140–5143.

### 3. Copies of $^1\text{H}$ , $^{13}\text{C}\{^1\text{H}\}$ , and $^{19}\text{F}$ Spectra of the Products 3.

#### *N*-Phenylcinnamamide (3a):

$^1\text{H}$  NMR (500 MHz,  $\text{CDCl}_3$ )

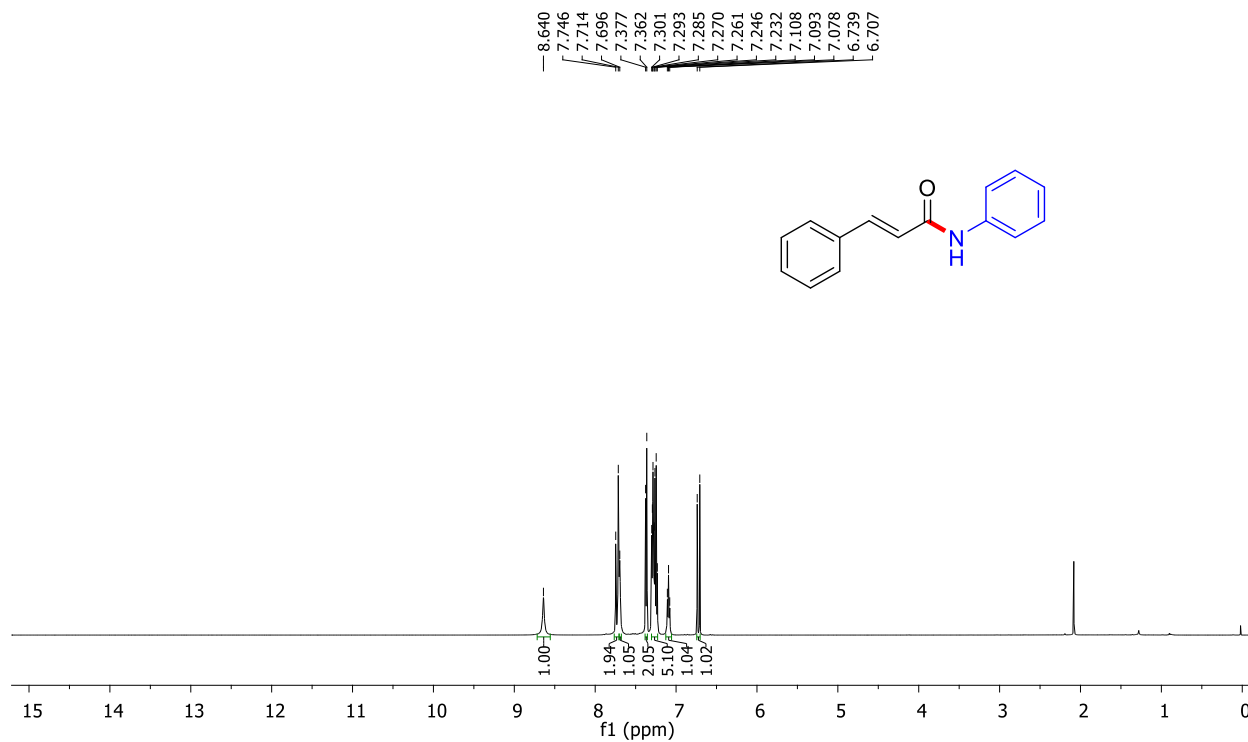

$^{13}\text{C}\{^1\text{H}\}$  NMR (126 MHz,  $\text{CDCl}_3$ )

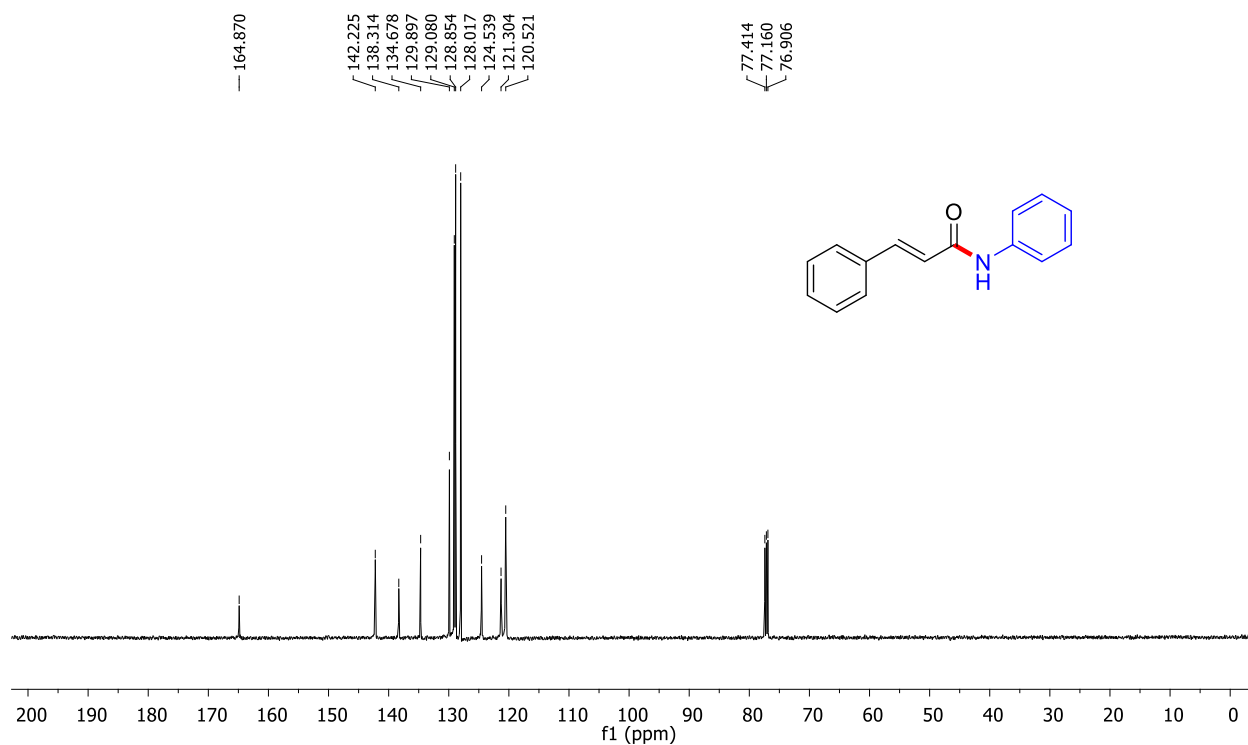

**(E)-N-Phenyl-3-(p-tolyl)acrylamide (3b):**

$^1\text{H}$  NMR (500 MHz,  $\text{CDCl}_3$ )

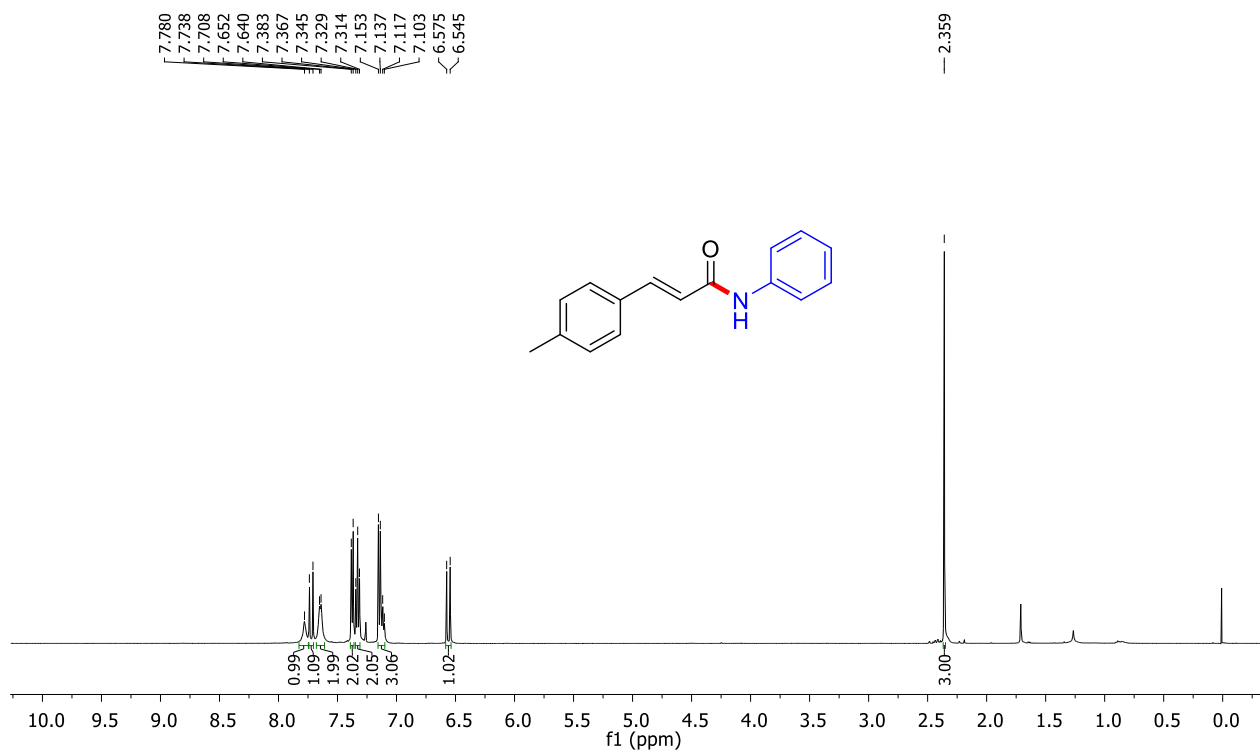

$^{13}\text{C}\{^1\text{H}\}$  NMR (126 MHz,  $\text{CDCl}_3$ )

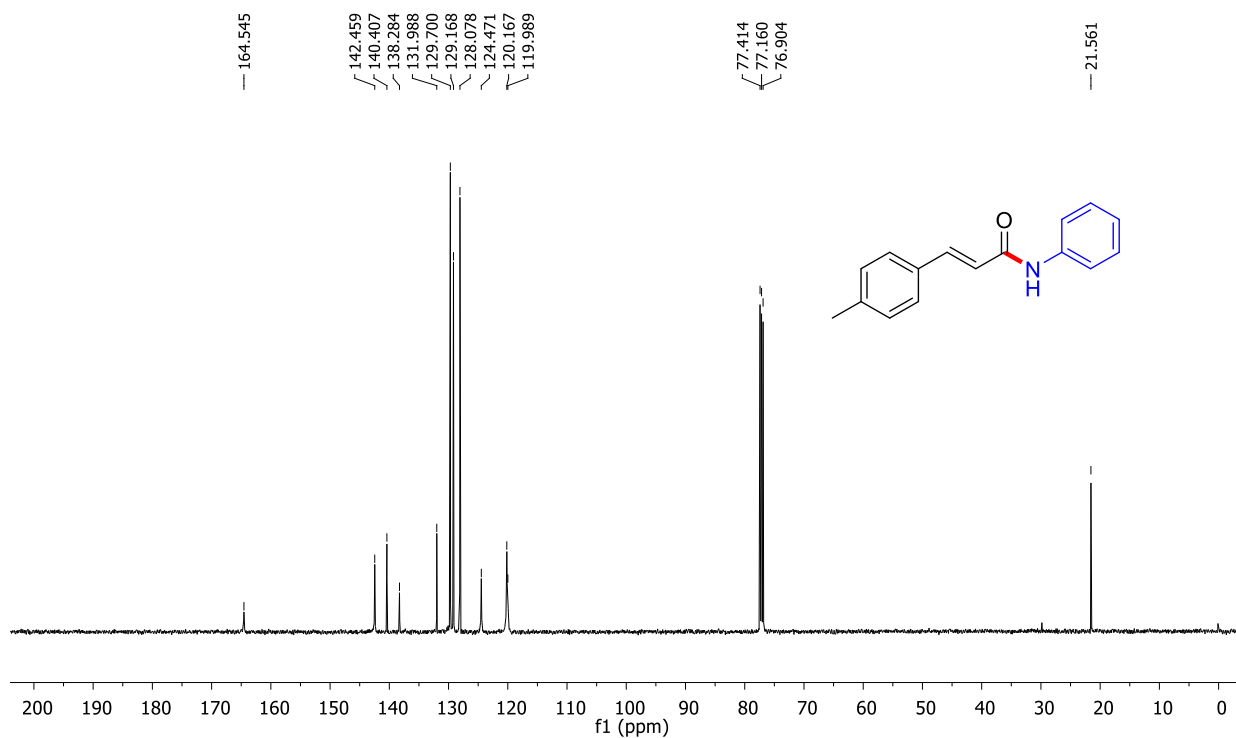

**(E)-3-(4-Methoxyphenyl)-N-phenylacrylamide (3c):**

$^1\text{H}$  NMR (500 MHz,  $\text{CDCl}_3$ )

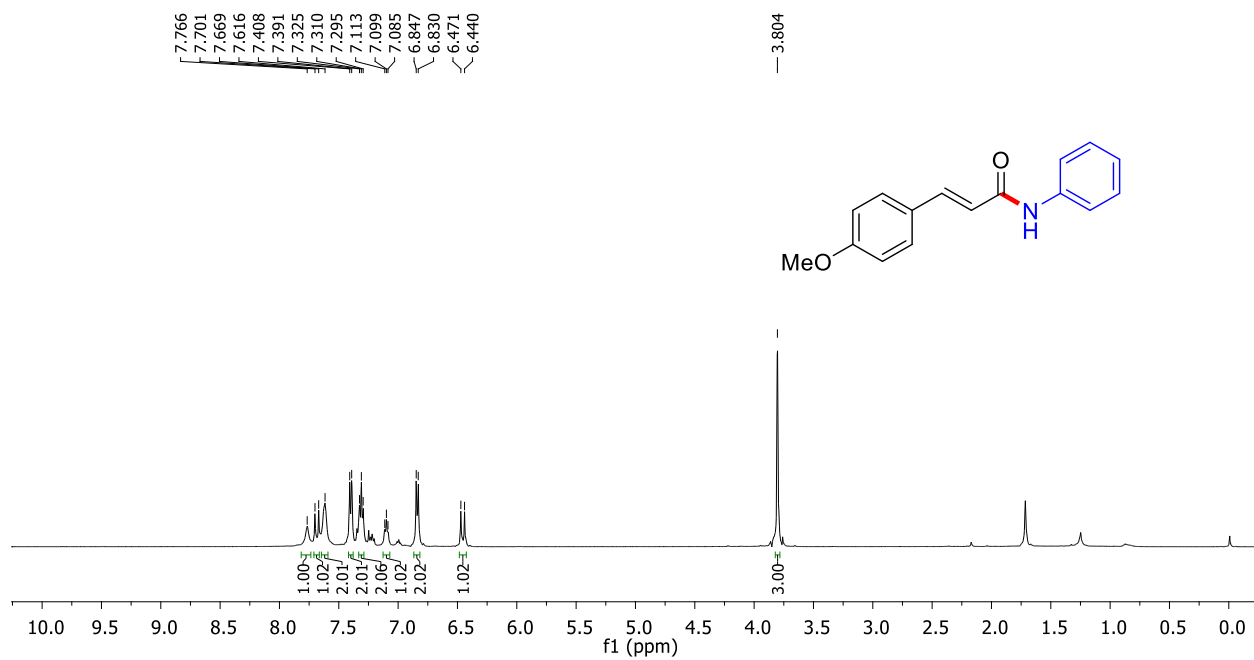

$^{13}\text{C}\{^1\text{H}\}$  NMR (126 MHz,  $\text{CDCl}_3$ )

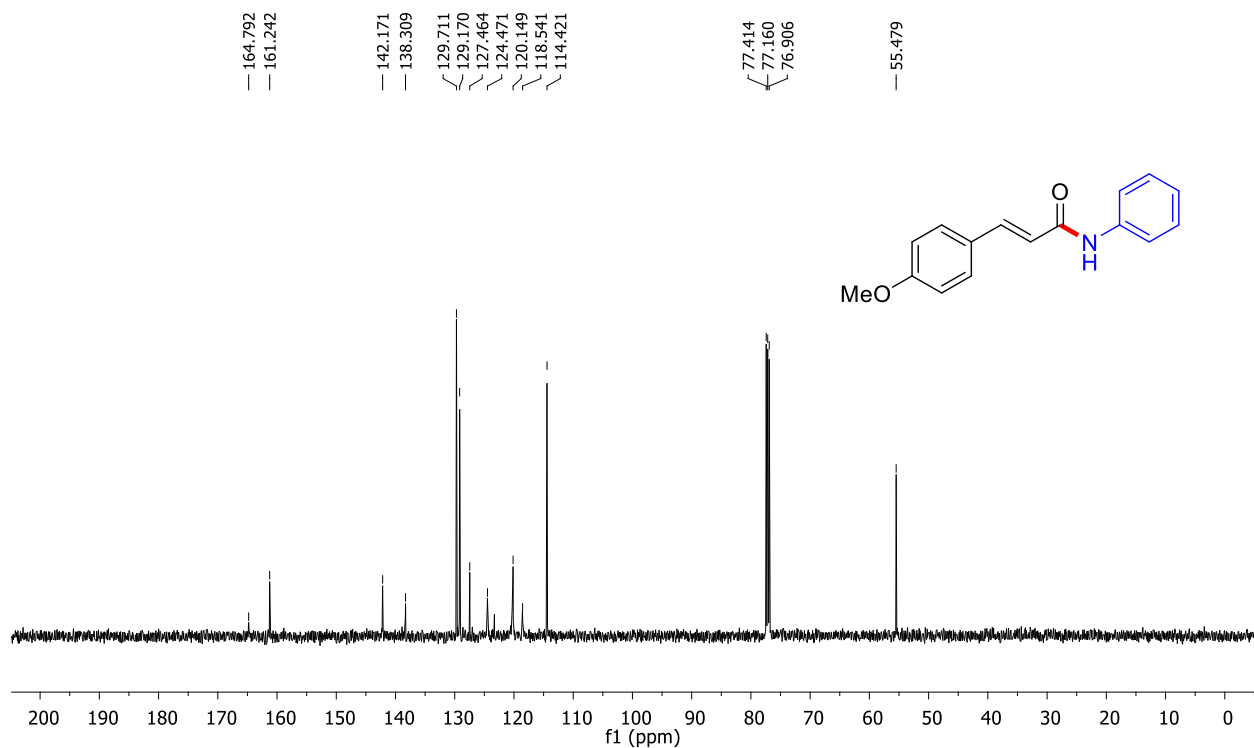

**(E)-3-([1,1'-Biphenyl]-4-yl)-N-phenylacrylamide (3d):**

<sup>1</sup>H NMR (500 MHz, CDCl<sub>3</sub>)

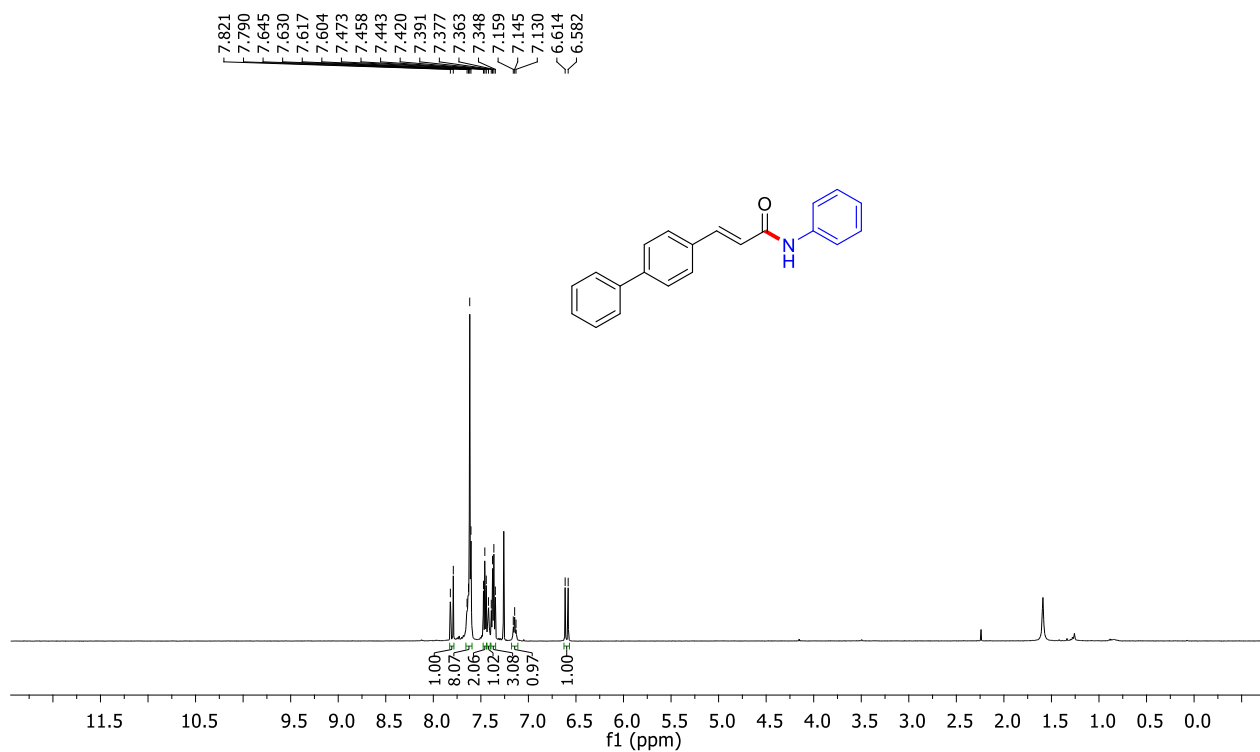

<sup>13</sup>C{<sup>1</sup>H} NMR (126 MHz, CDCl<sub>3</sub>)

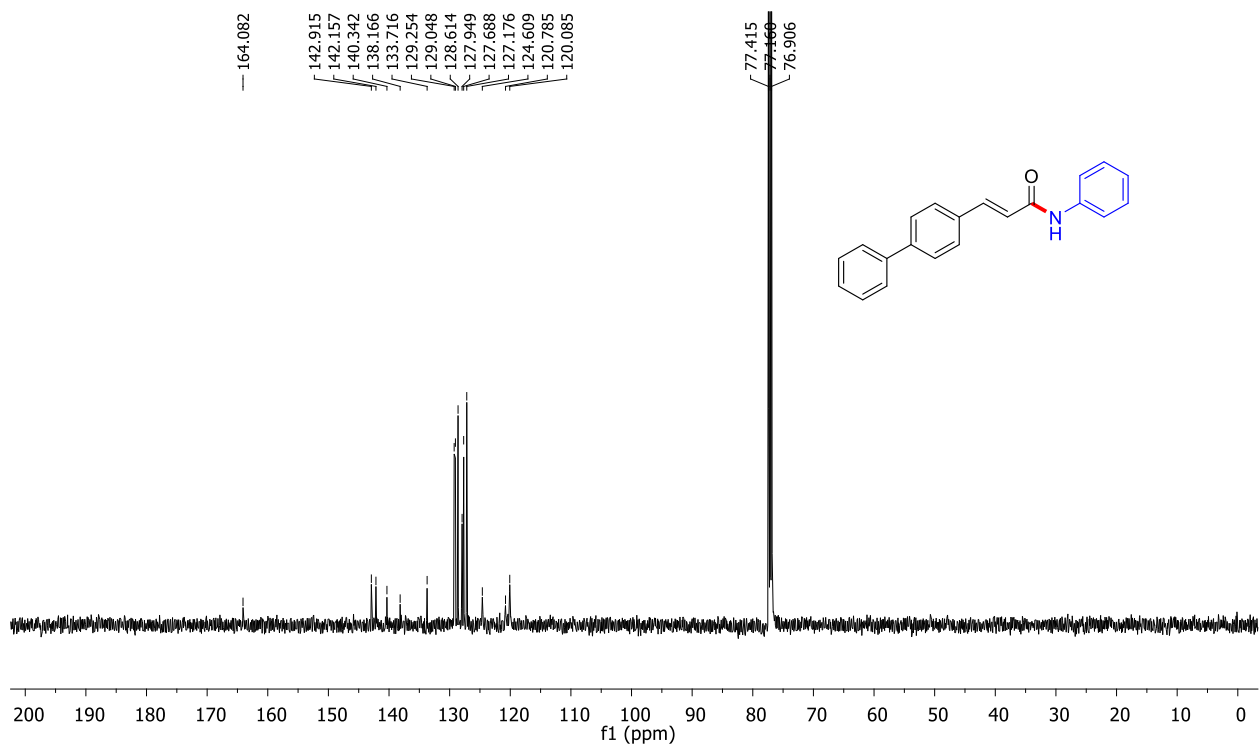

**(E)-3-(4-Fluorophenyl)-N-phenylacrylamide (3e):**

$^1\text{H}$  NMR (500 MHz,  $\text{CDCl}_3$ )

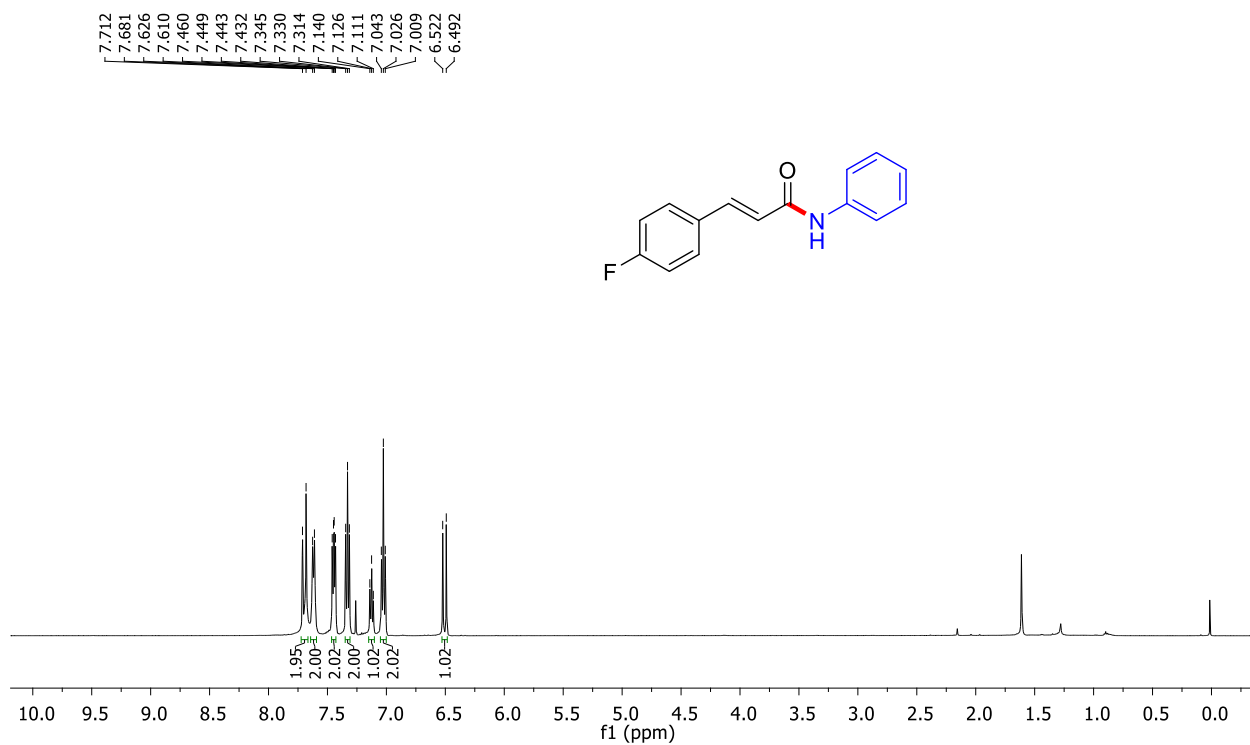

$^{13}\text{C}\{^1\text{H}\}$  NMR (126 MHz,  $\text{CDCl}_3$ )

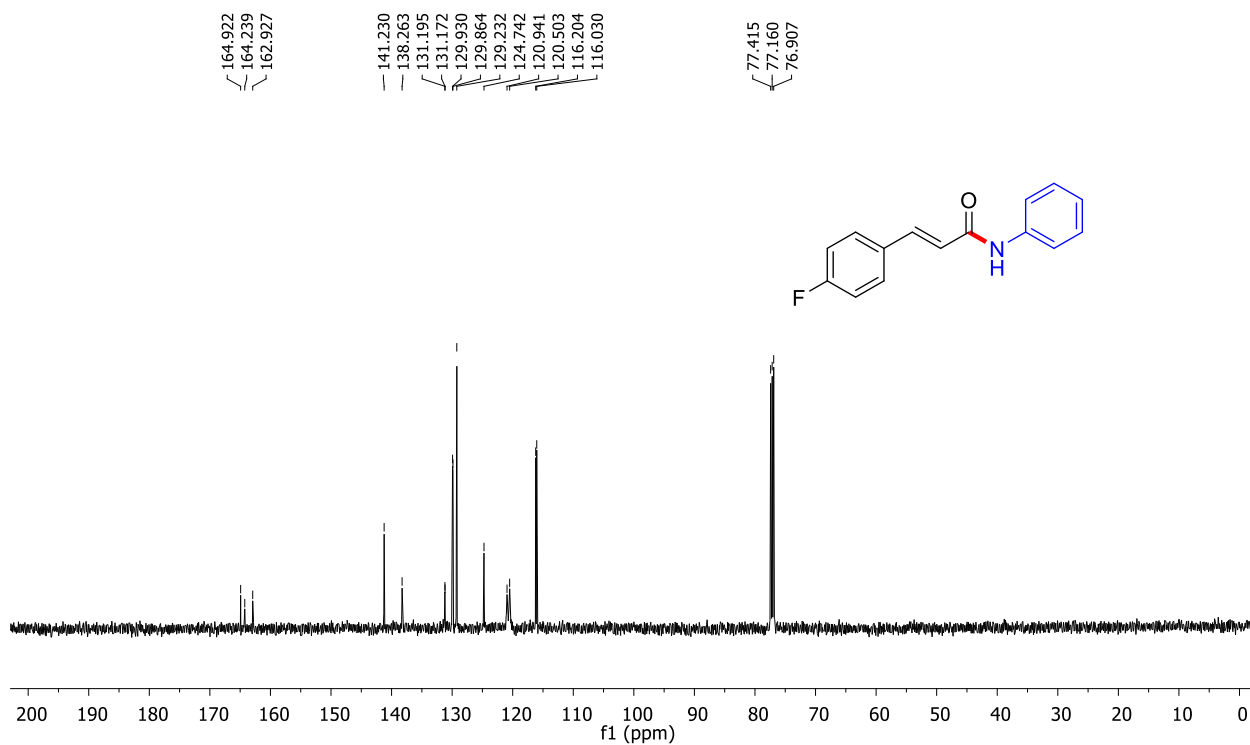

$^{19}\text{F}$  NMR (471 MHz,  $\text{CDCl}_3$ )

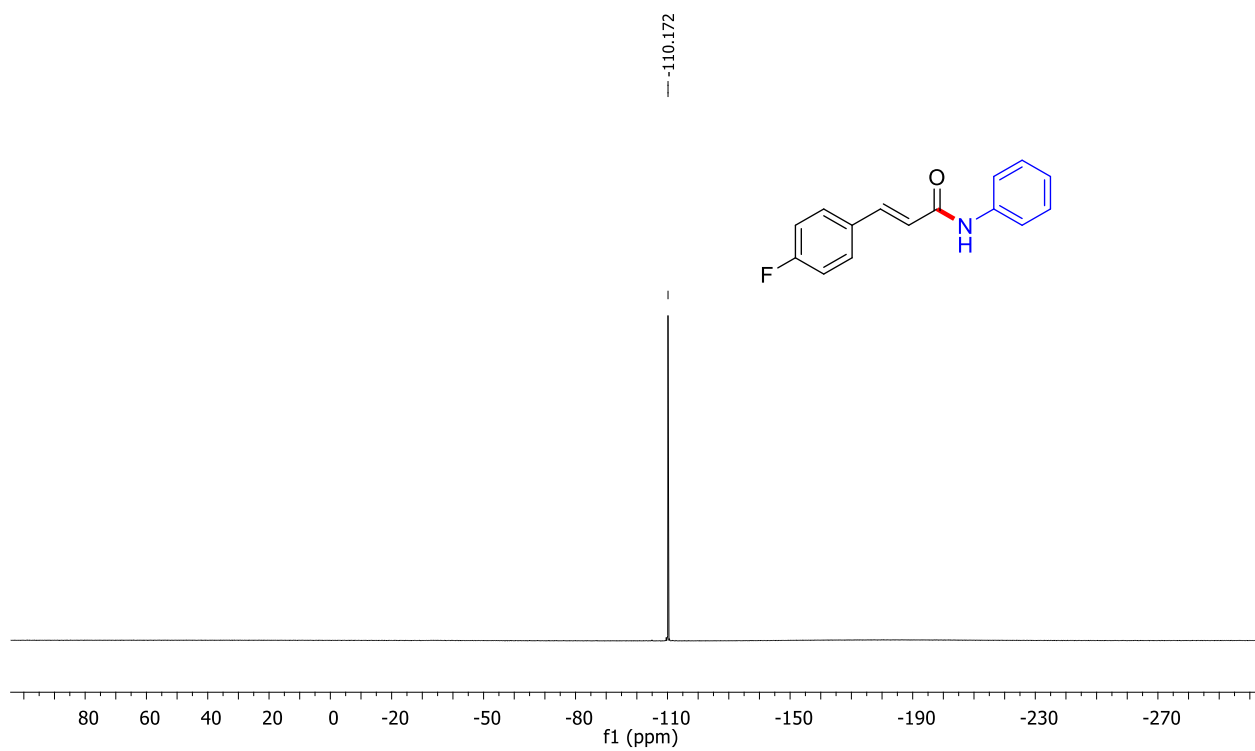

**(E)-3-(4-Chlorophenyl)-N-phenylacrylamide (3f):**

$^1\text{H}$  NMR (500 MHz,  $\text{CDCl}_3$ )

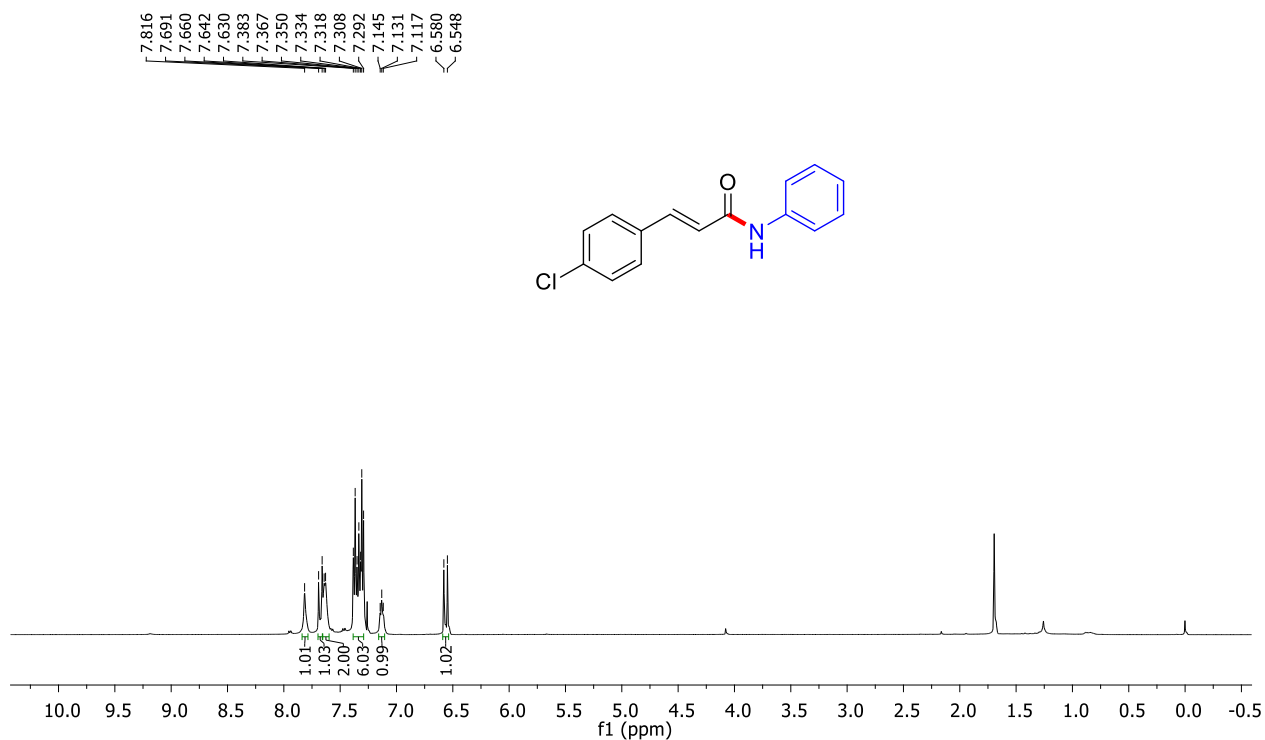

$^{13}\text{C}\{^1\text{H}\}$  NMR (151 MHz,  $\text{CDCl}_3$ )

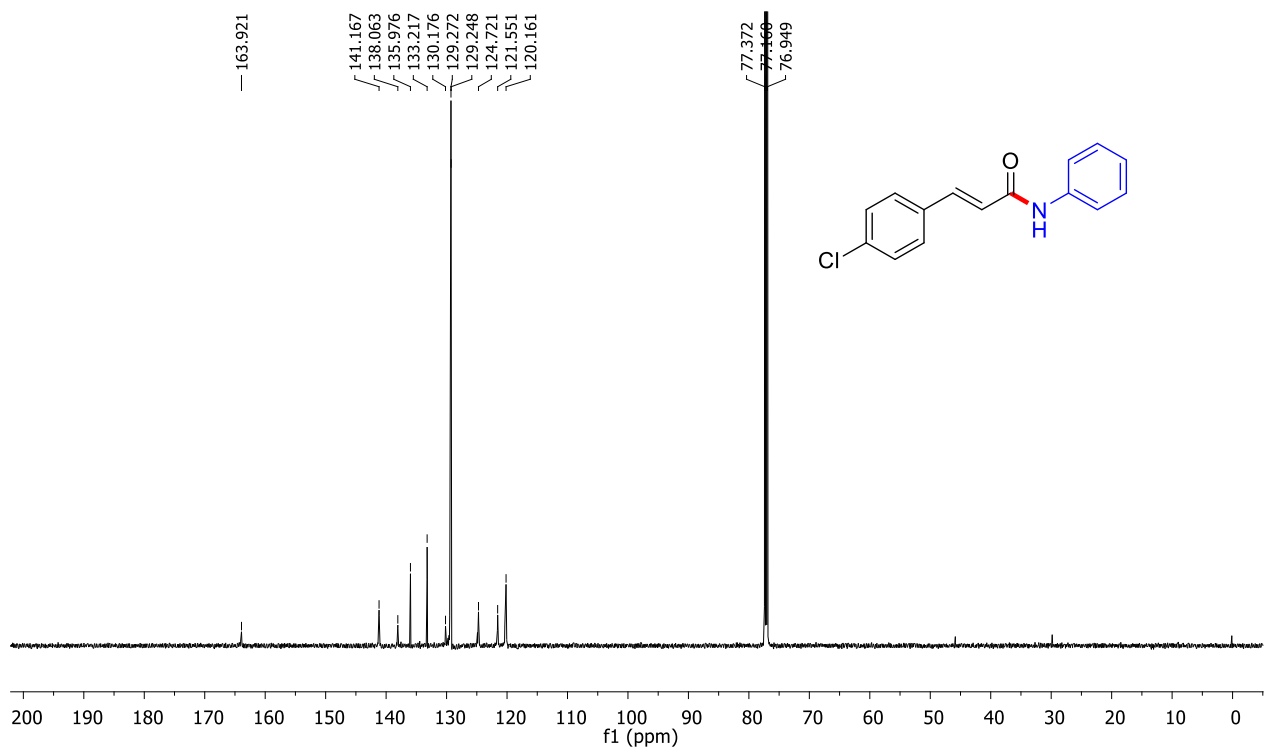

**(E)-3-(4-Bromophenyl)-N-phenylacrylamide (3g):**

$^1\text{H}$  NMR (500 MHz,  $\text{CDCl}_3$ )

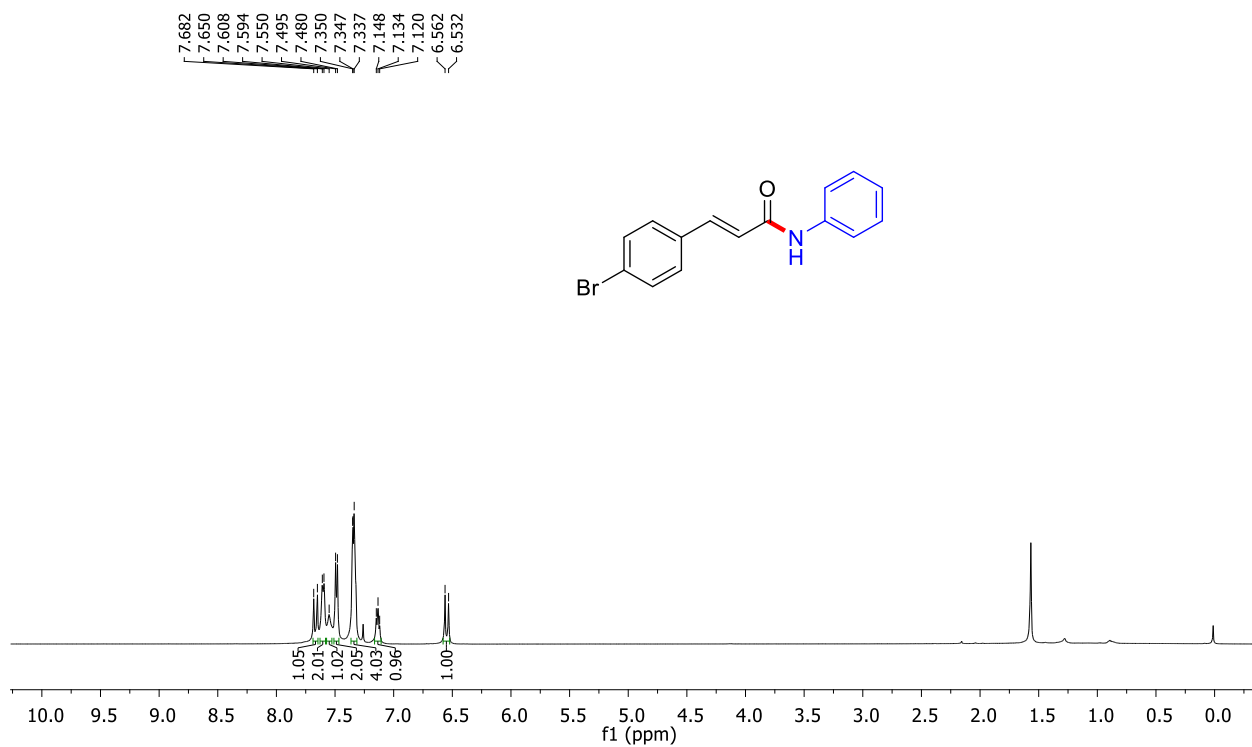

$^{13}\text{C}\{^1\text{H}\}$  NMR (151 MHz,  $\text{CDCl}_3$ )

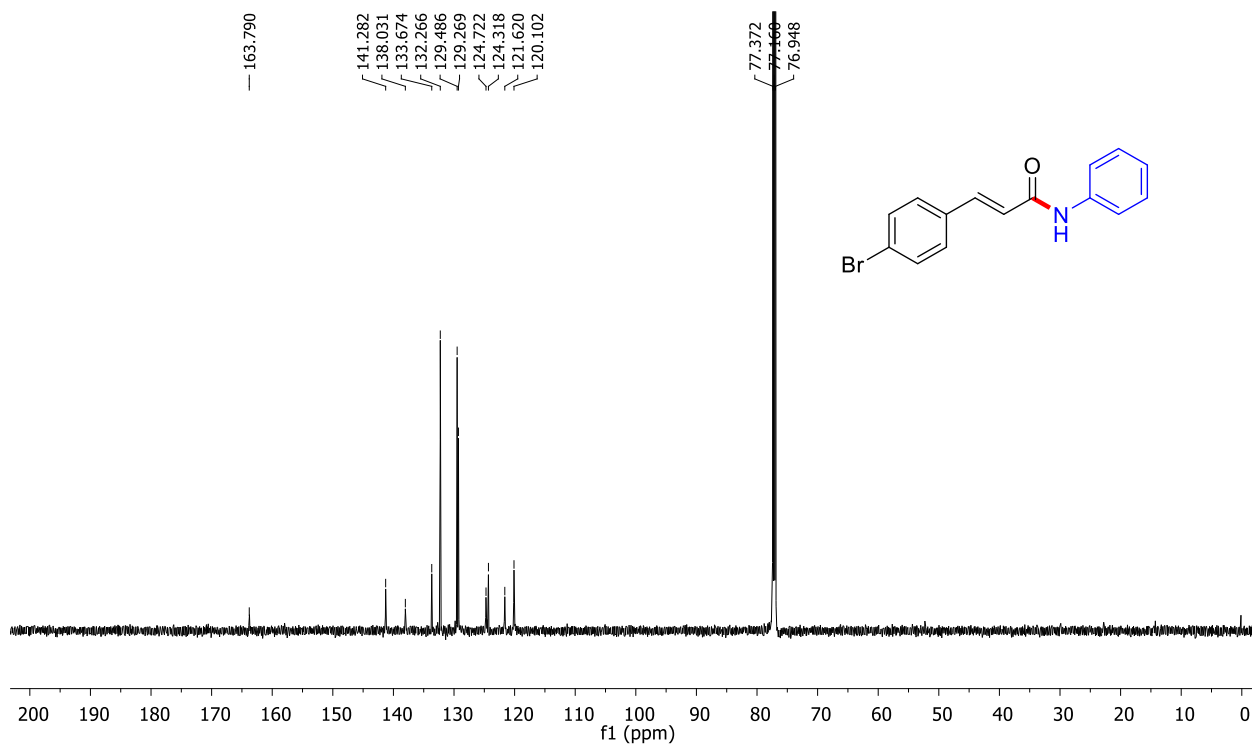

**(E)-3-(3,4-Dichlorophenyl)-N-phenylacrylamide (3h):**

$^1\text{H}$  NMR (500 MHz,  $\text{CDCl}_3$ )

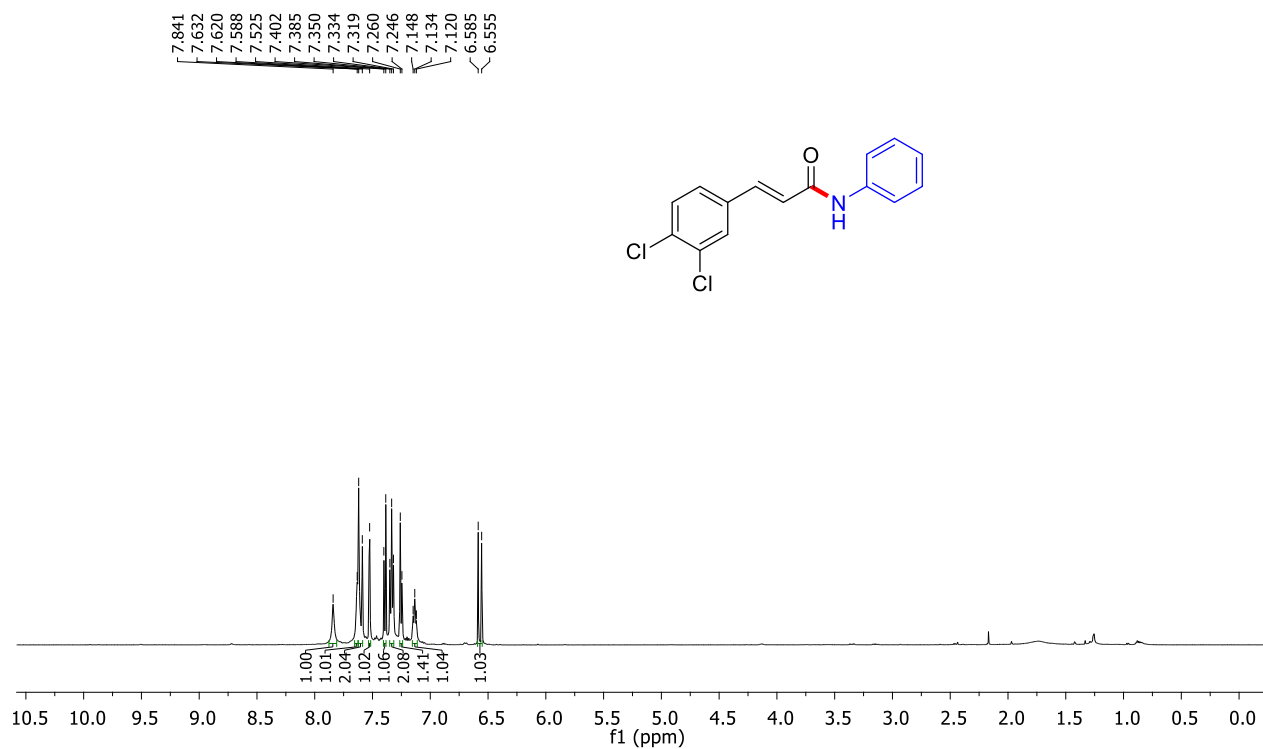

$^{13}\text{C}\{^1\text{H}\}$  NMR (126 MHz,  $\text{CDCl}_3$ )

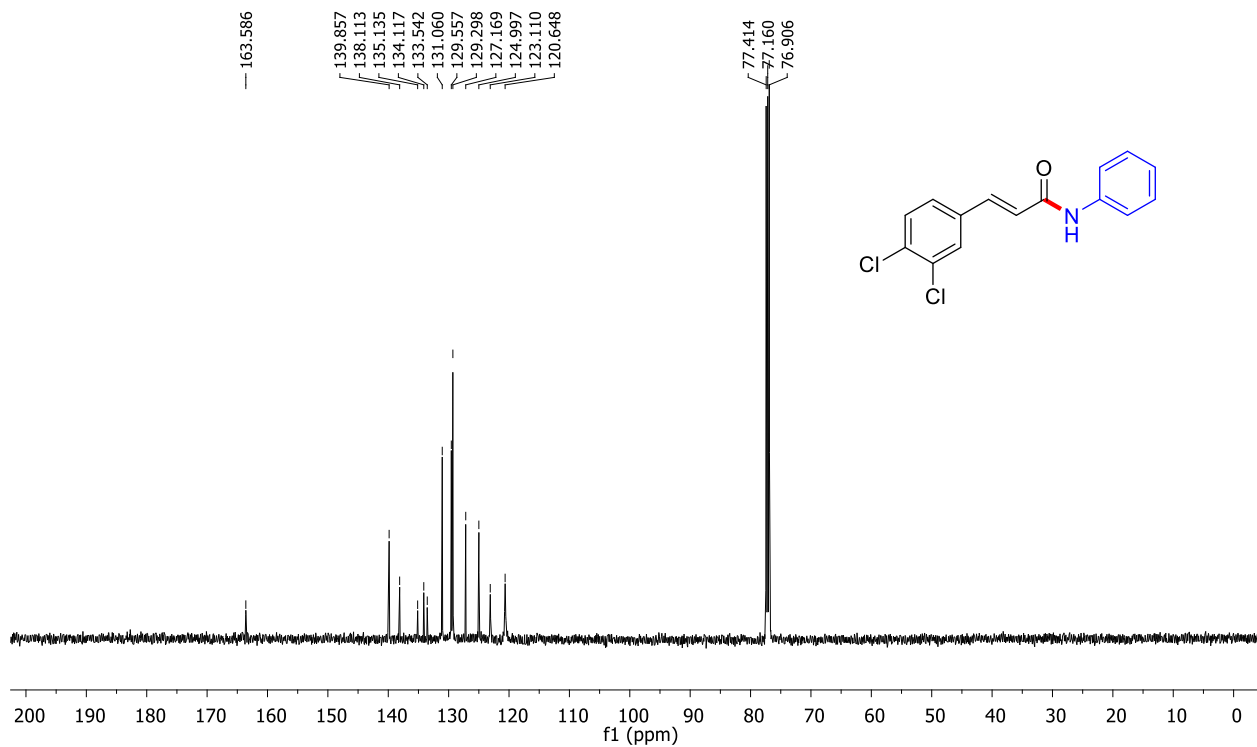

**(E)-3-(3-Methoxyphenyl)-N-phenylacrylamide (3i):**

$^1\text{H}$  NMR (500 MHz,  $\text{CDCl}_3$ )

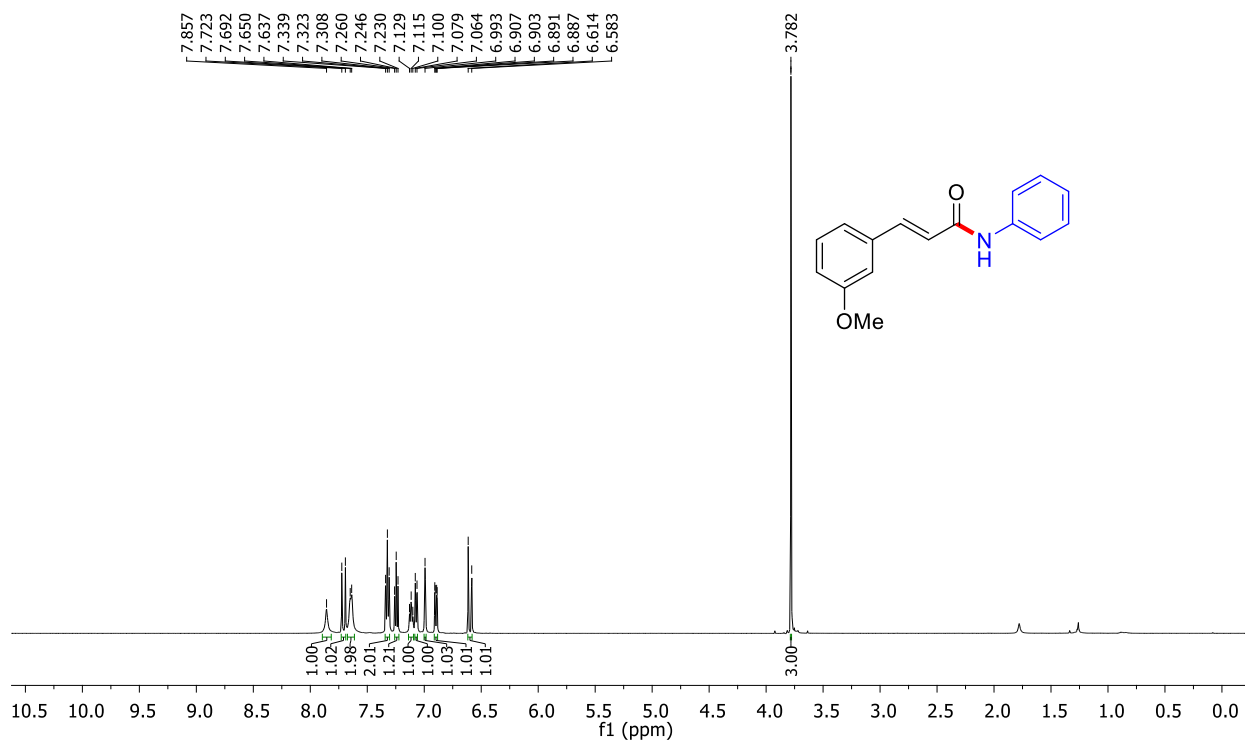

$^{13}\text{C}\{^1\text{H}\}$  NMR (126 MHz,  $\text{CDCl}_3$ )

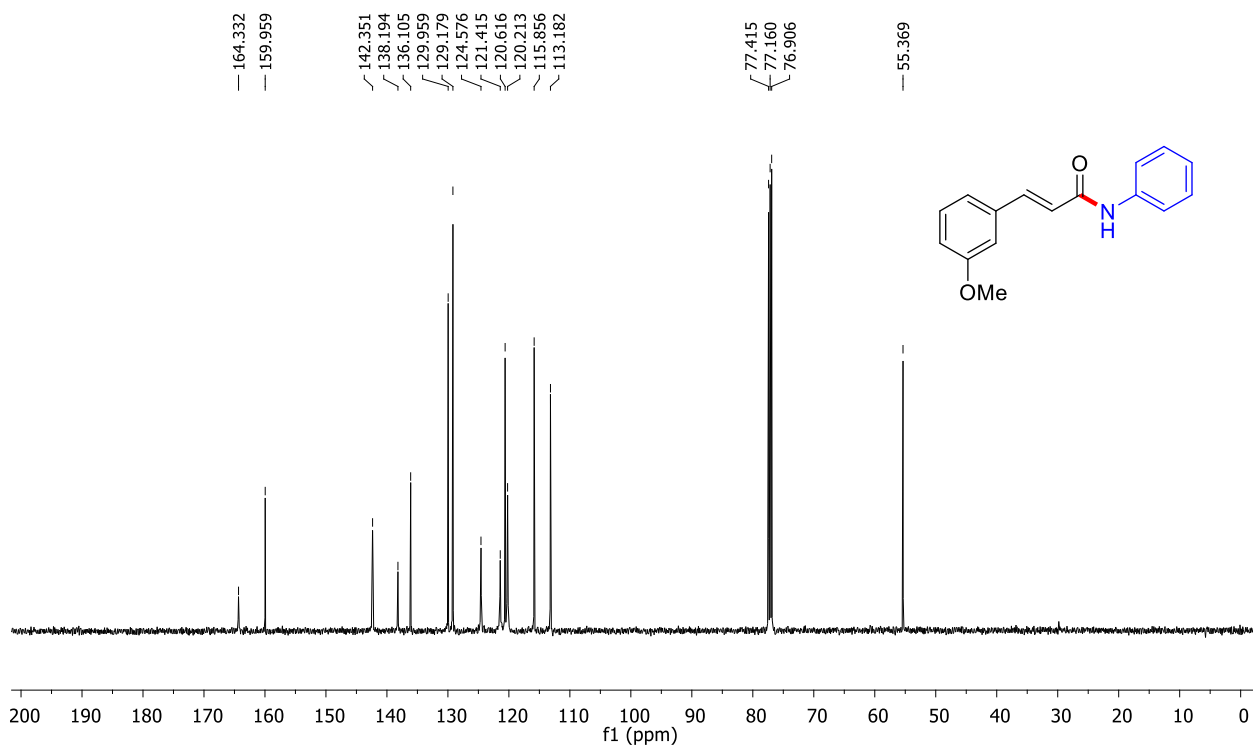

**(E)-N-Phenyl-3-(3-(trifluoromethyl)phenyl)acrylamide (3j):**

$^1\text{H}$  NMR (500 MHz,  $\text{CDCl}_3$ )

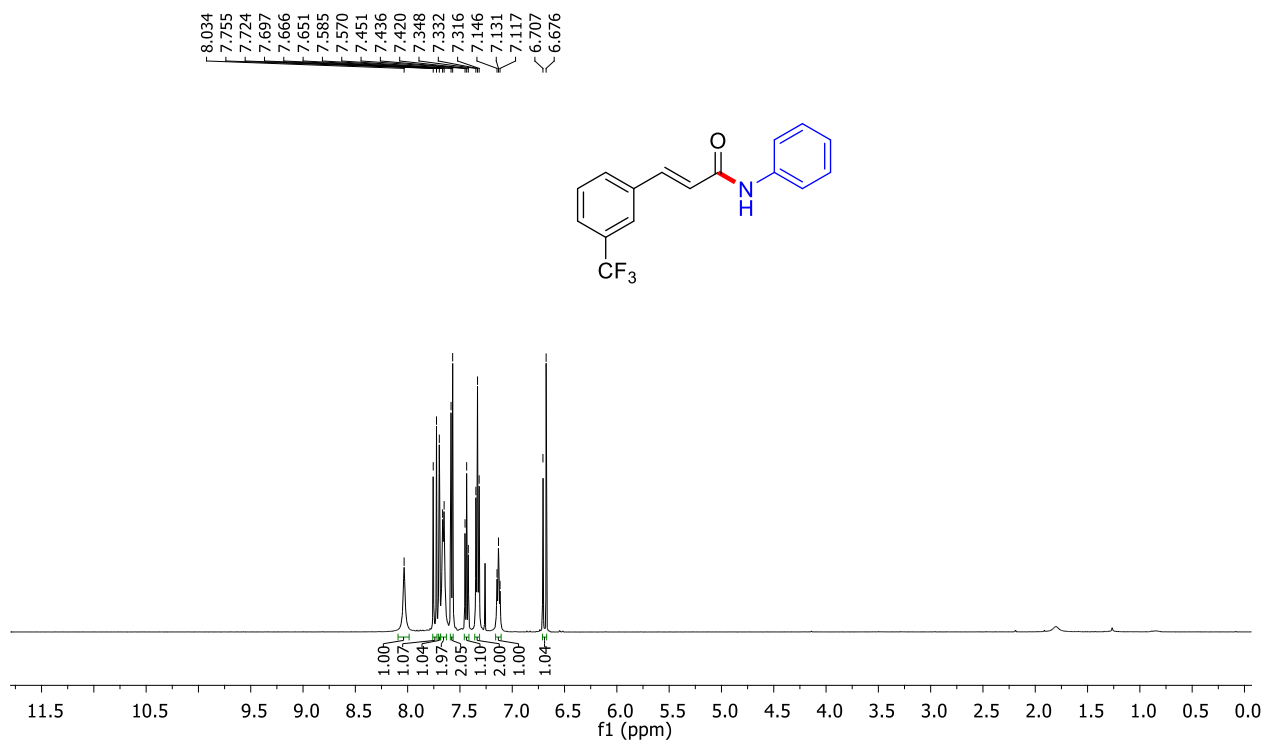

$^{13}\text{C}\{^1\text{H}\}$  NMR (126 MHz,  $\text{CDCl}_3$ )

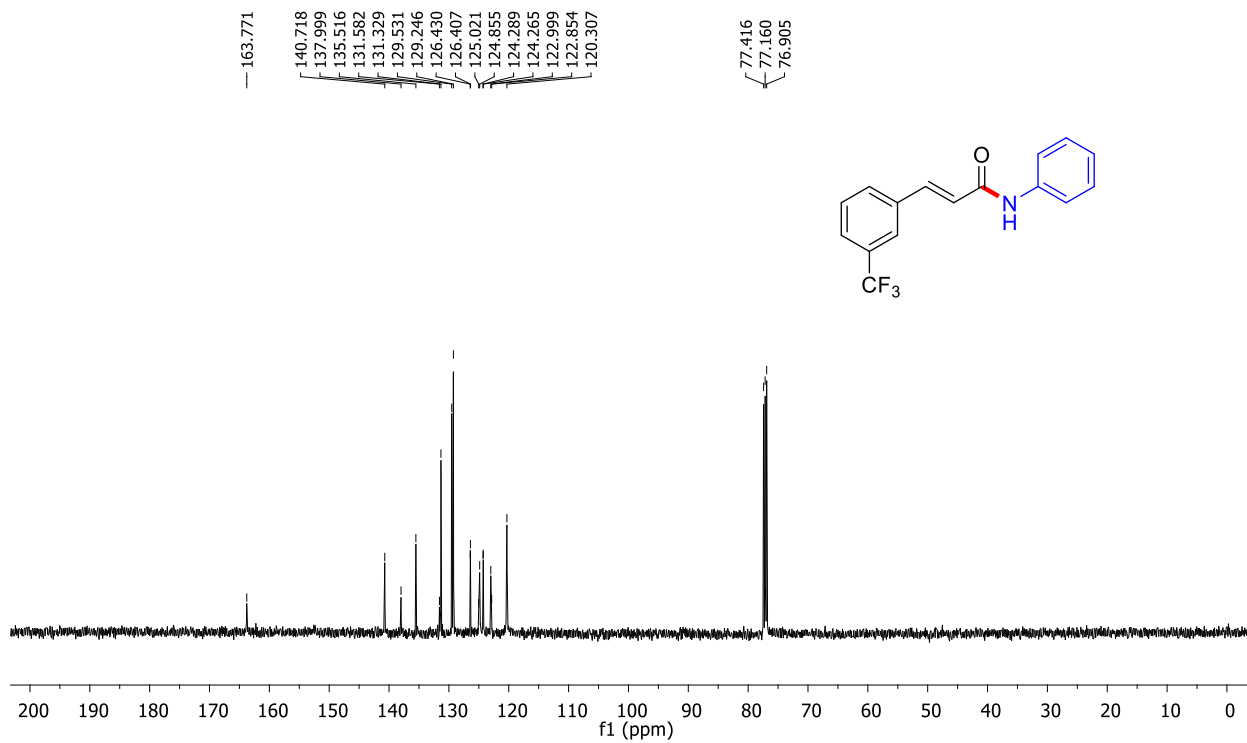

$^{19}\text{F}$  NMR (471 MHz,  $\text{CDCl}_3$ )

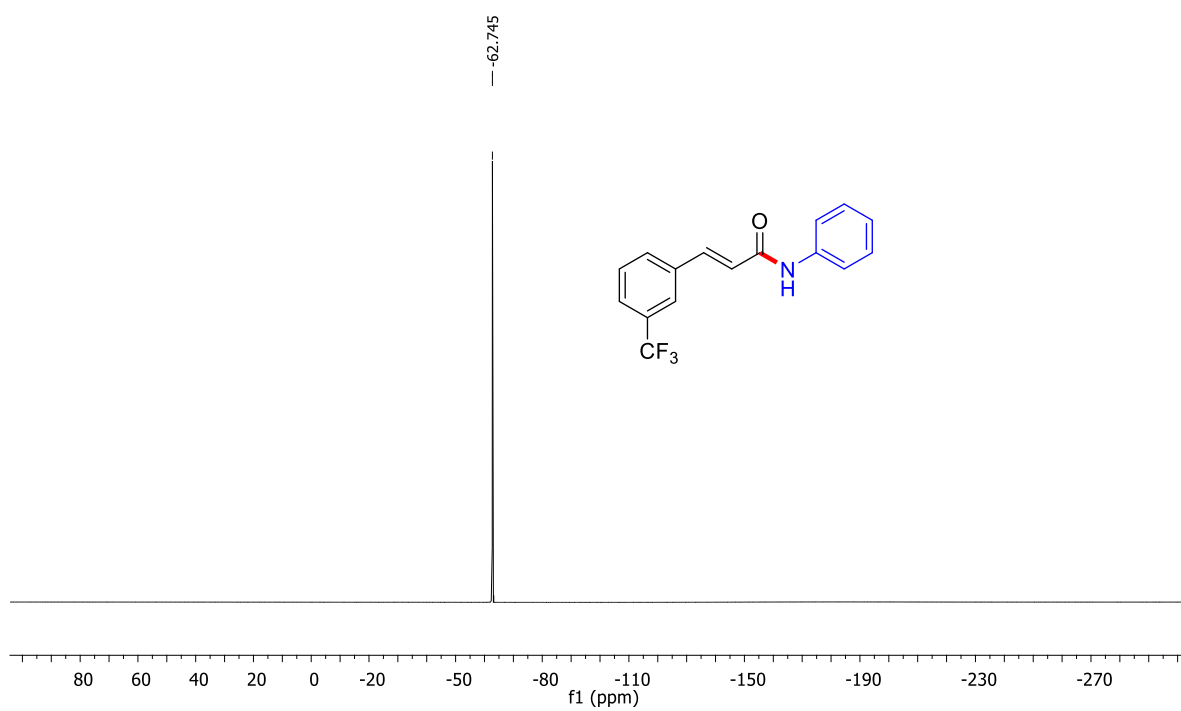

**(E)-N-Phenyl-3-(*o*-tolyl)acrylamide (3k):**

$^1\text{H}$  NMR (600 MHz,  $\text{CDCl}_3$ )

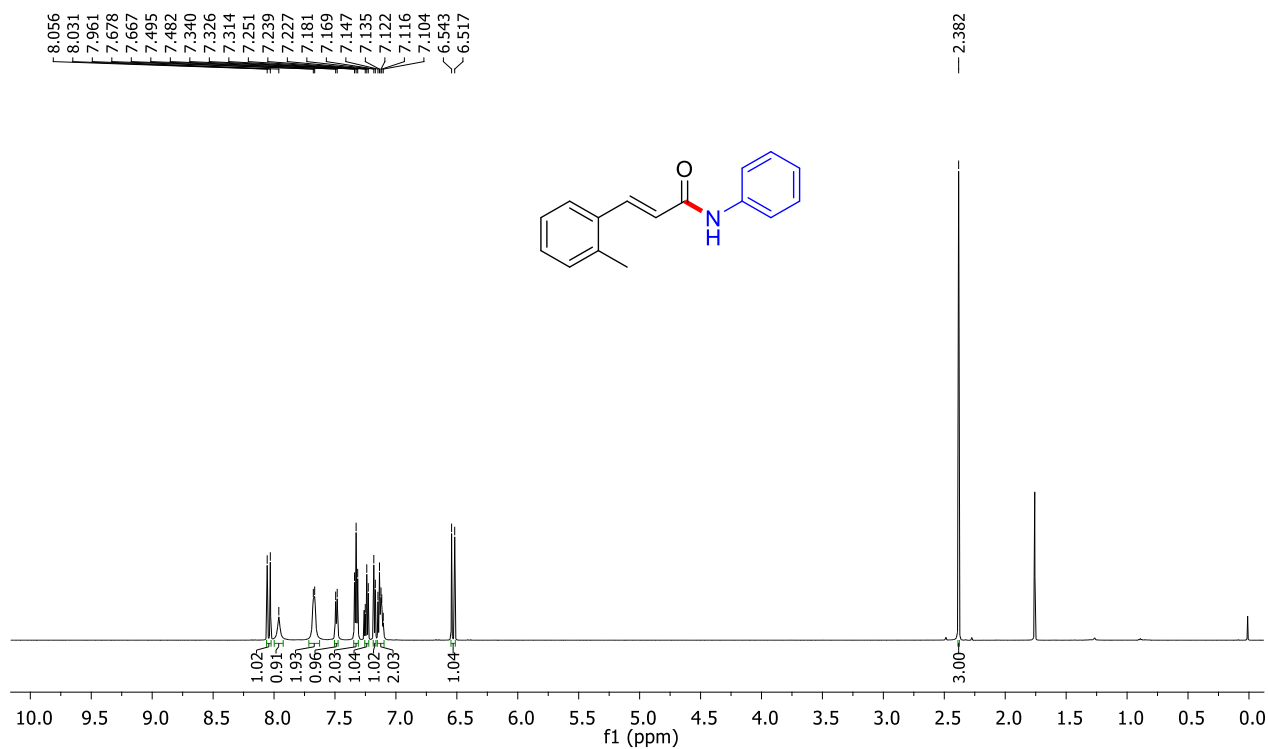

$^{13}\text{C}\{^1\text{H}\}$  NMR (151 MHz,  $\text{CDCl}_3$ )

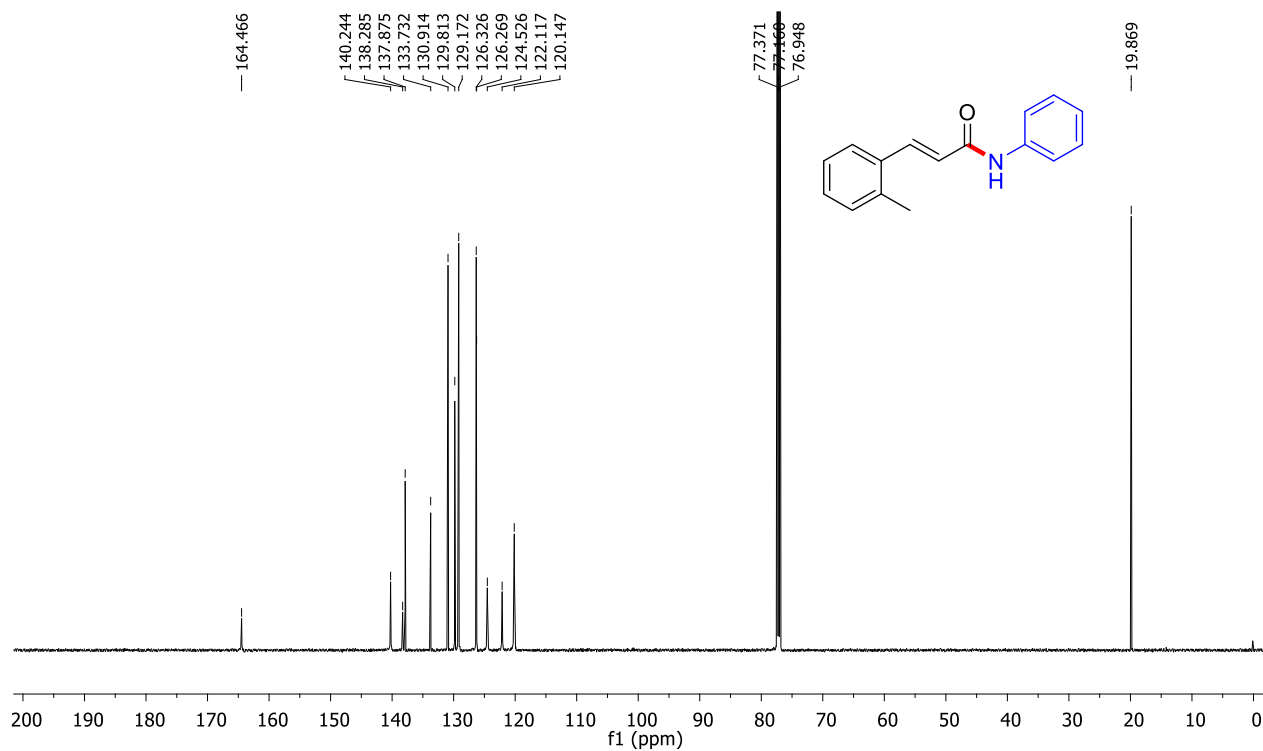

**(E)-3-(2-Methoxyphenyl)-N-phenylacrylamide (3l):**

$^1\text{H}$  NMR (500 MHz,  $\text{CDCl}_3$ )

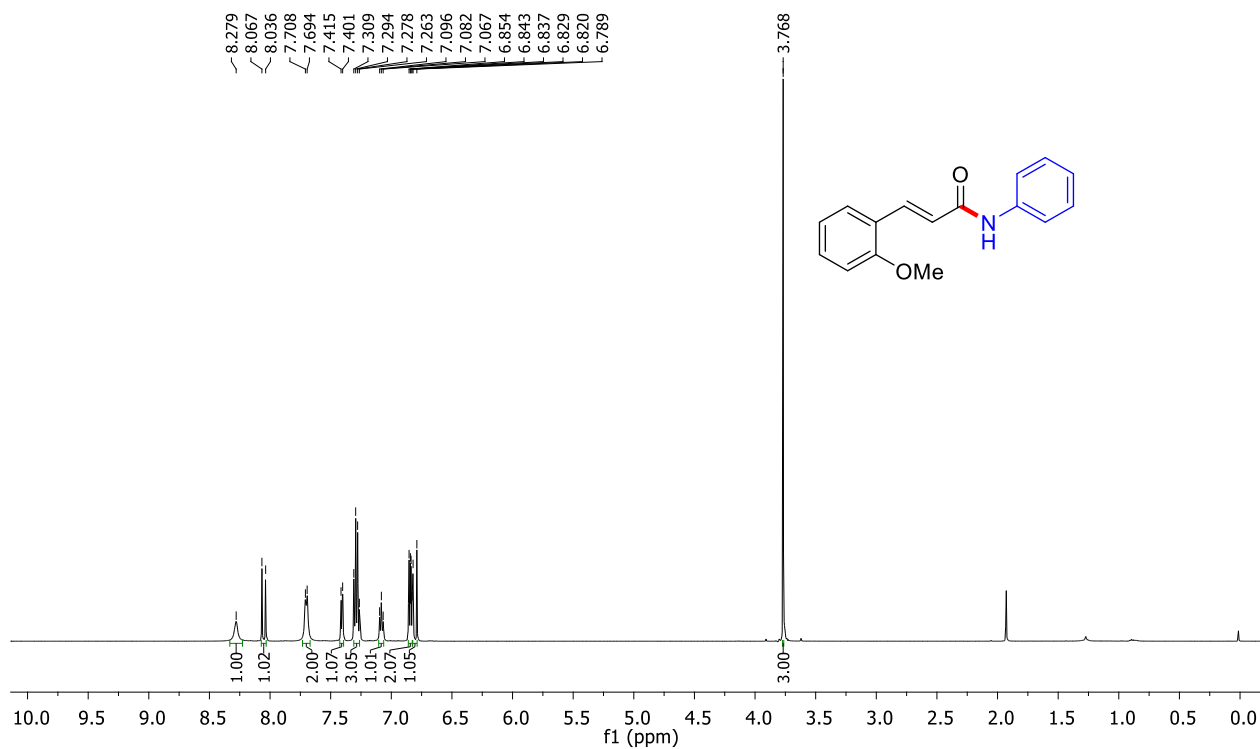

$^{13}\text{C}\{^1\text{H}\}$  NMR (126 MHz,  $\text{CDCl}_3$ )

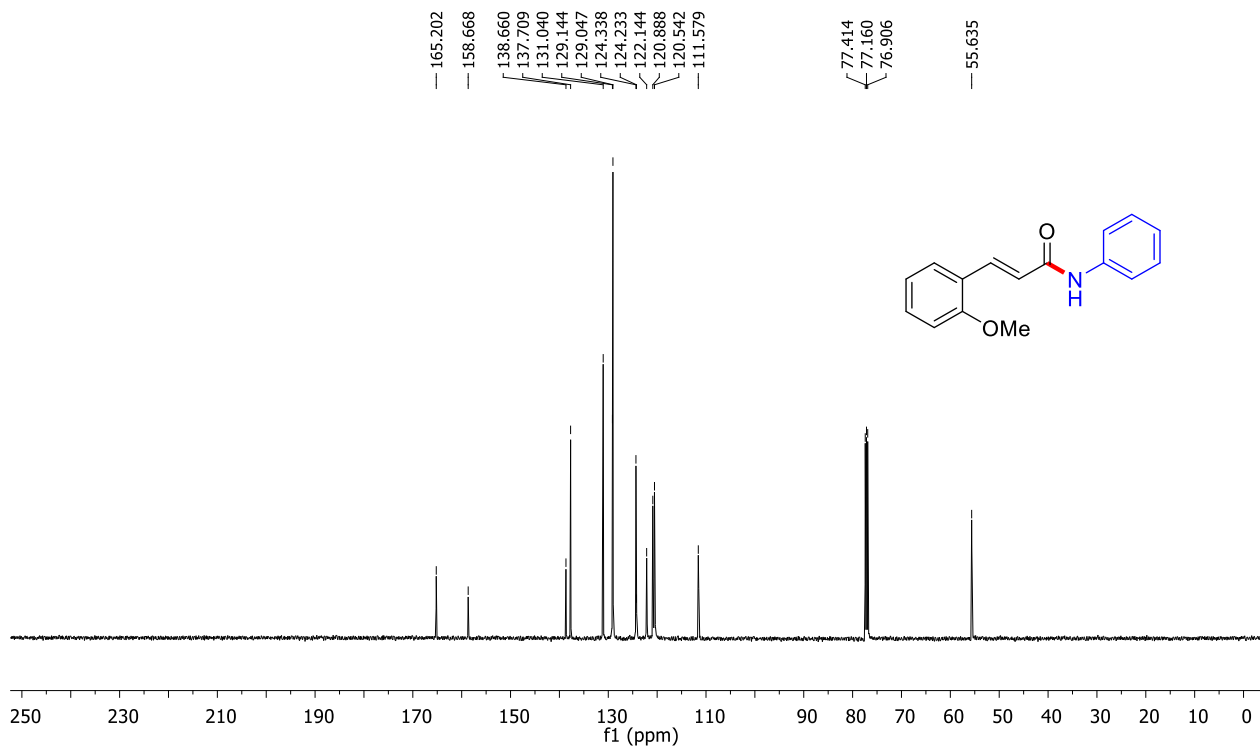

**(E)-3-(2-Chlorophenyl)-N-phenylacrylamide (3m):**

<sup>1</sup>H NMR (500 MHz, CDCl<sub>3</sub>)

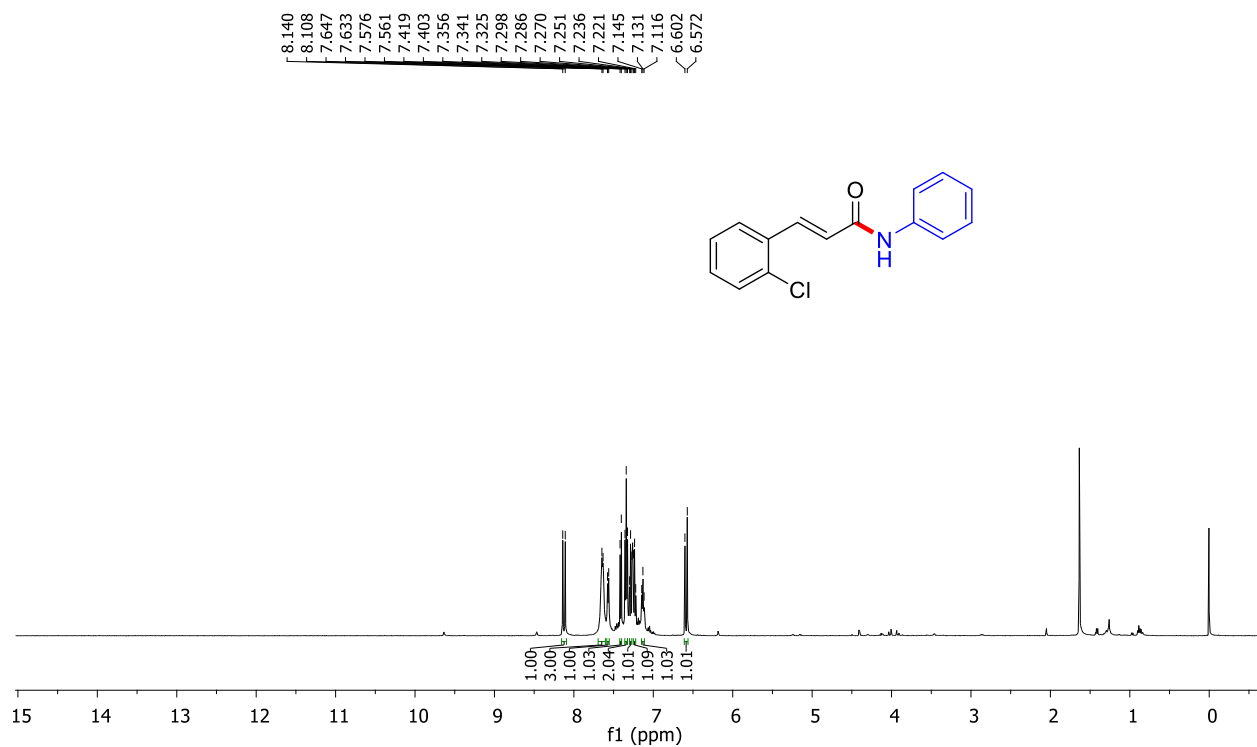

<sup>13</sup>C{<sup>1</sup>H} NMR (126 MHz, CDCl<sub>3</sub>)

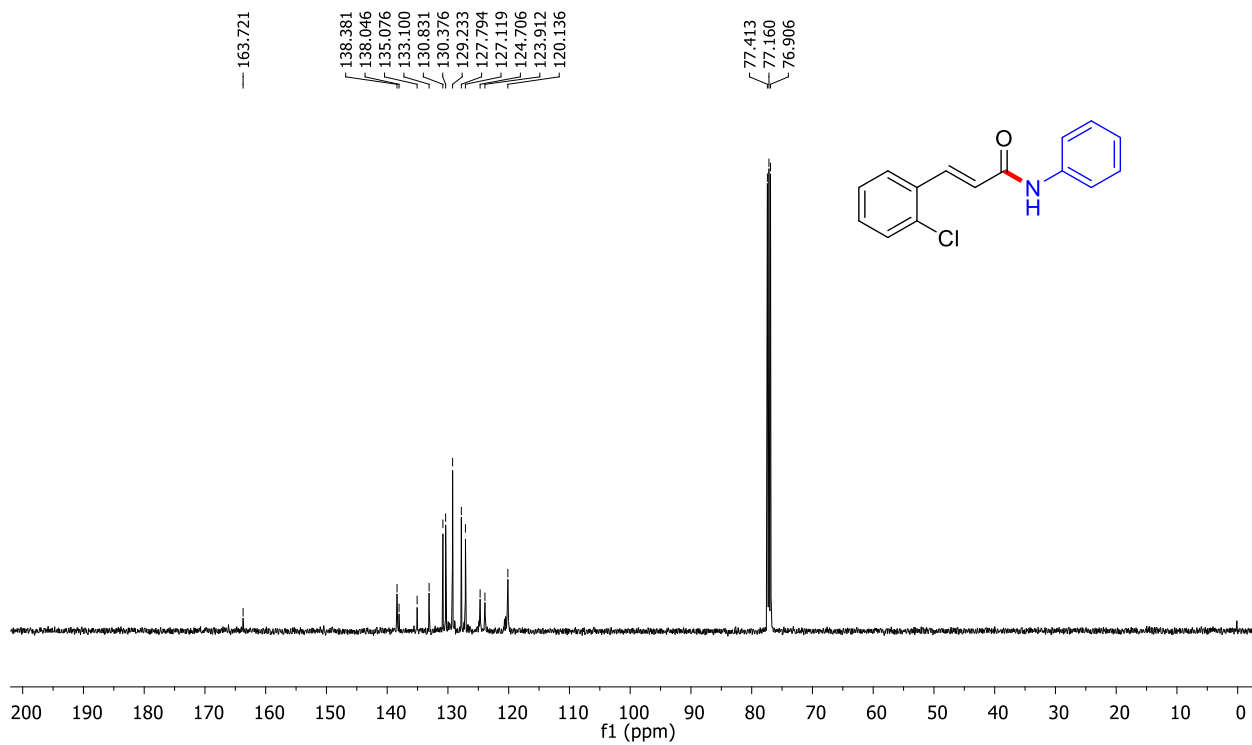

**(E)-N-Phenyl-3-(2-(trifluoromethyl)phenyl)acrylamide (3n):**

<sup>1</sup>H NMR (500 MHz, CDCl<sub>3</sub>)

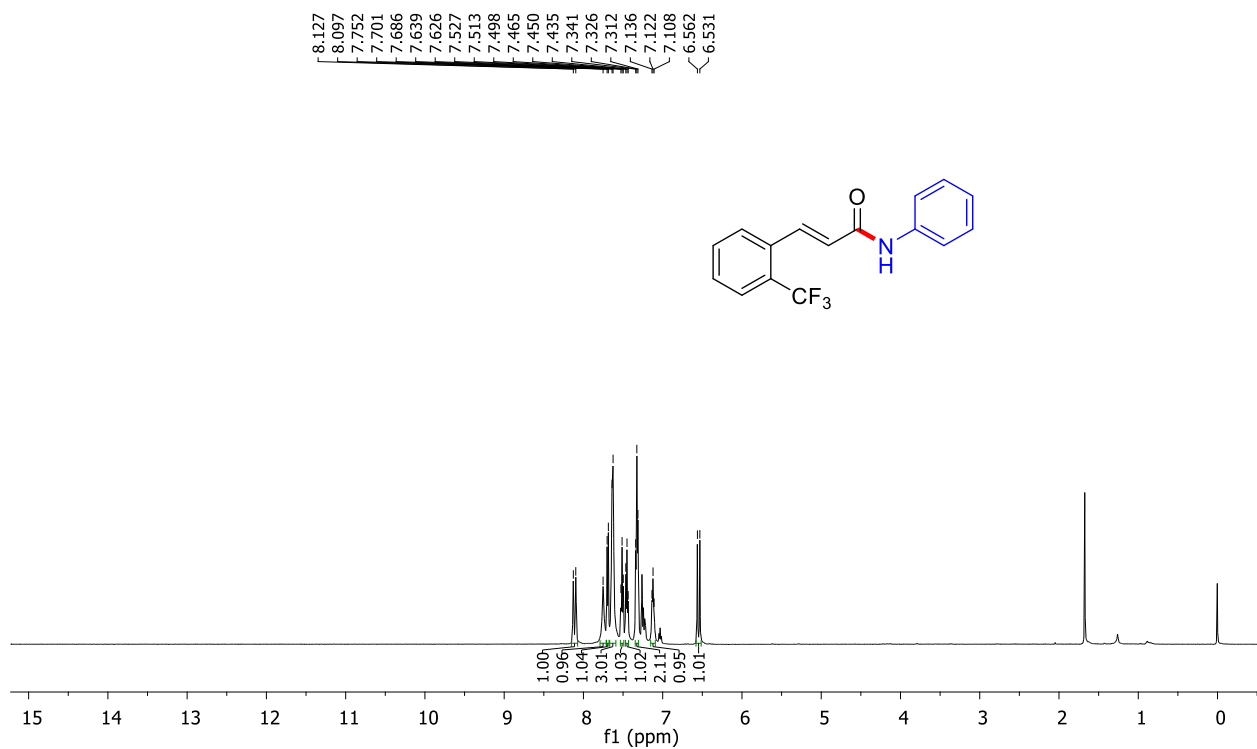

<sup>13</sup>C{<sup>1</sup>H} NMR (126 MHz, CDCl<sub>3</sub>)

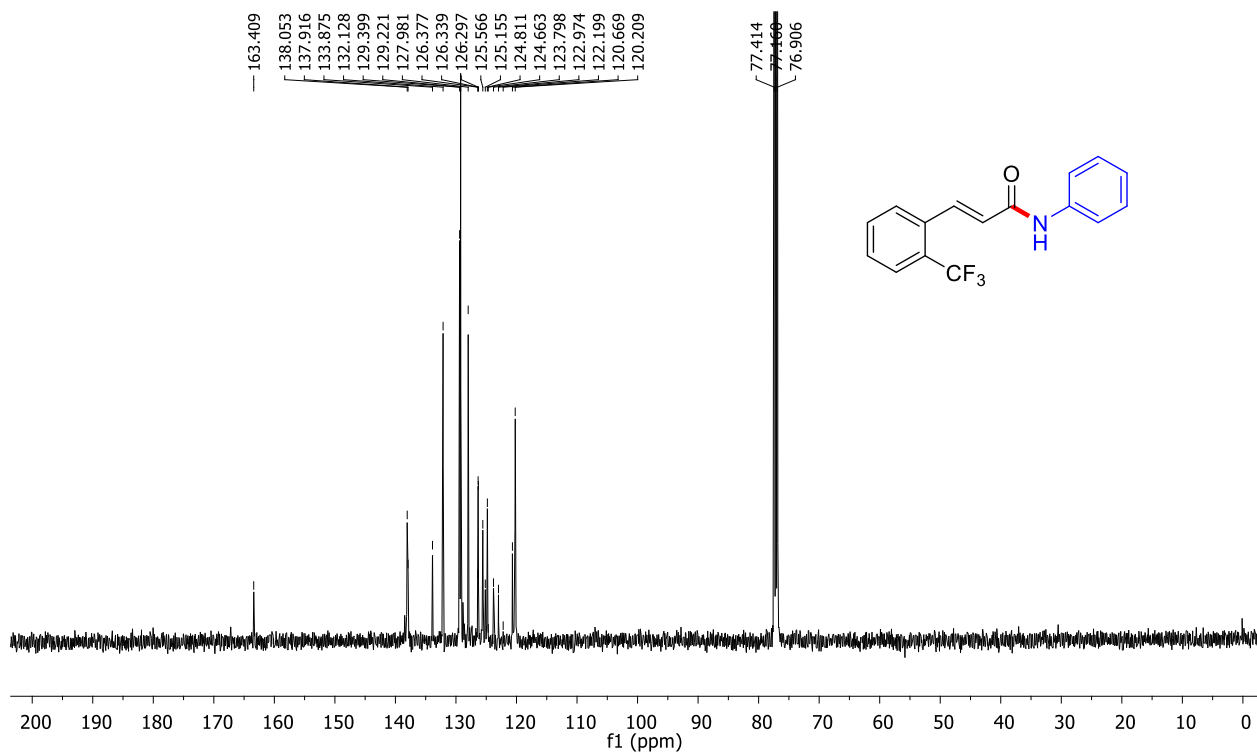

$^{19}\text{F}$  NMR (471 MHz,  $\text{CDCl}_3$ )

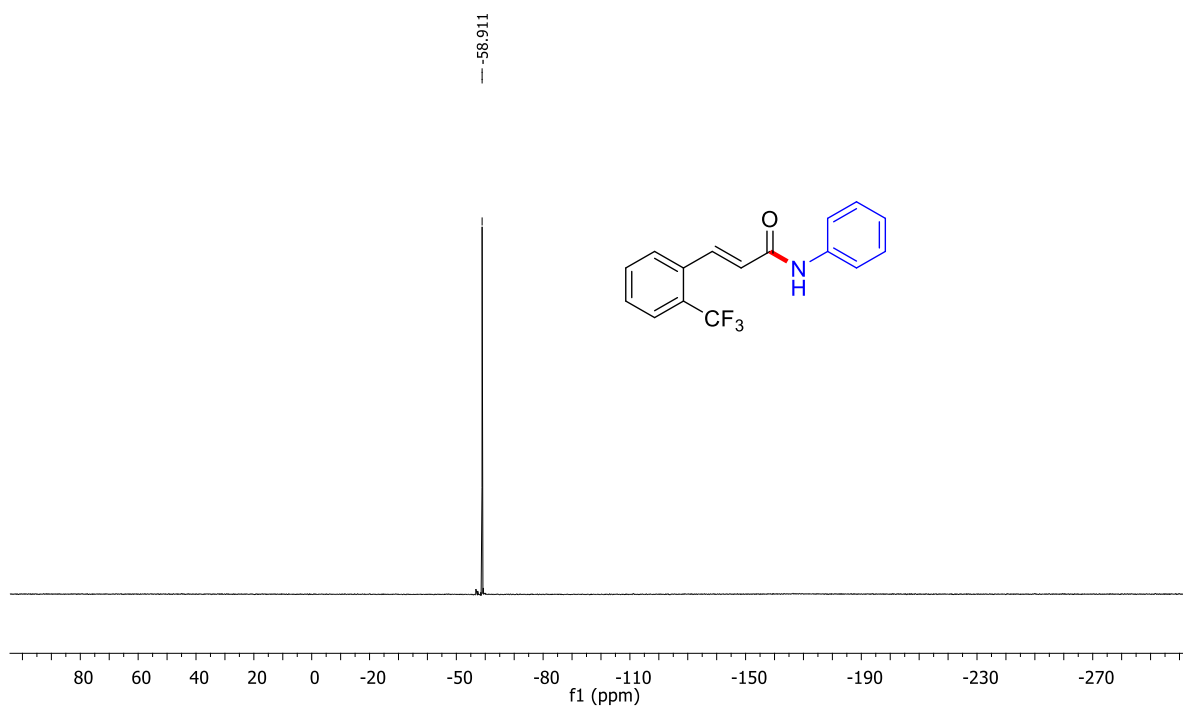

**(E)-3-(Naphthalen-1-yl)-N-phenylacrylamide (3o):**

$^1\text{H}$  NMR (500 MHz,  $\text{CDCl}_3$ )

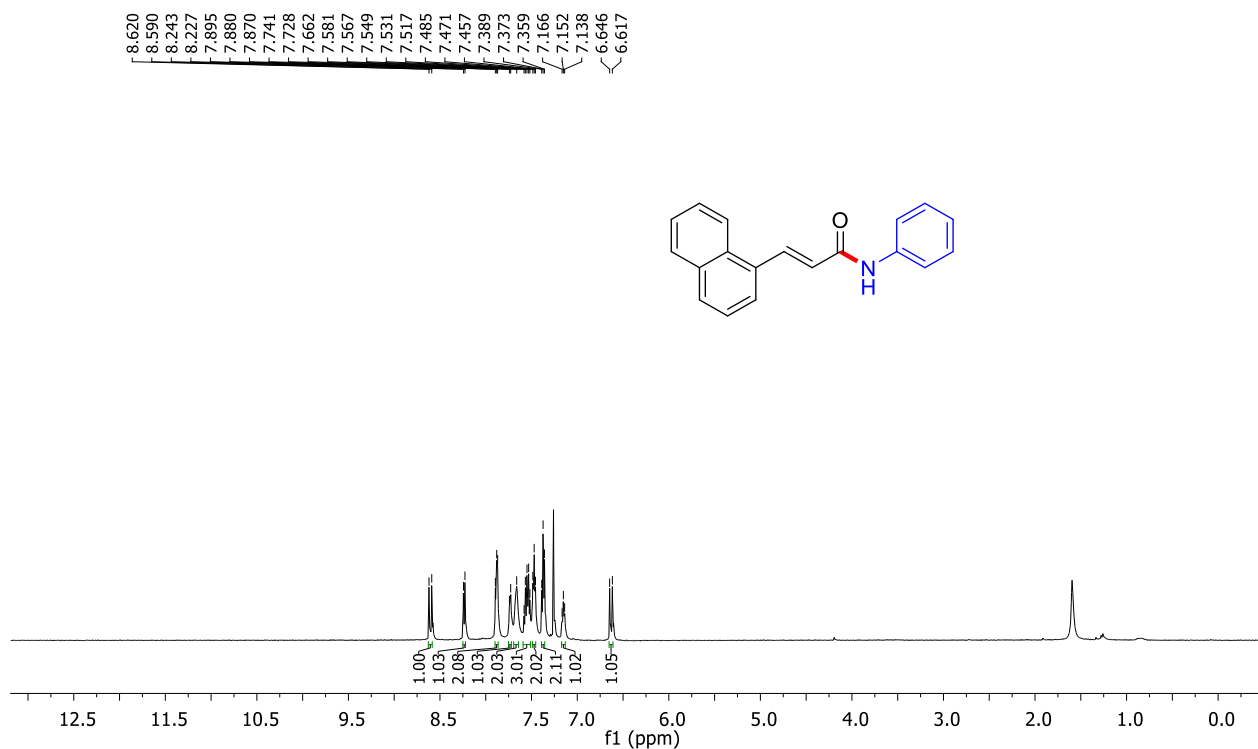

$^{13}\text{C}\{^1\text{H}\}$  NMR (126 MHz,  $\text{CDCl}_3$ )

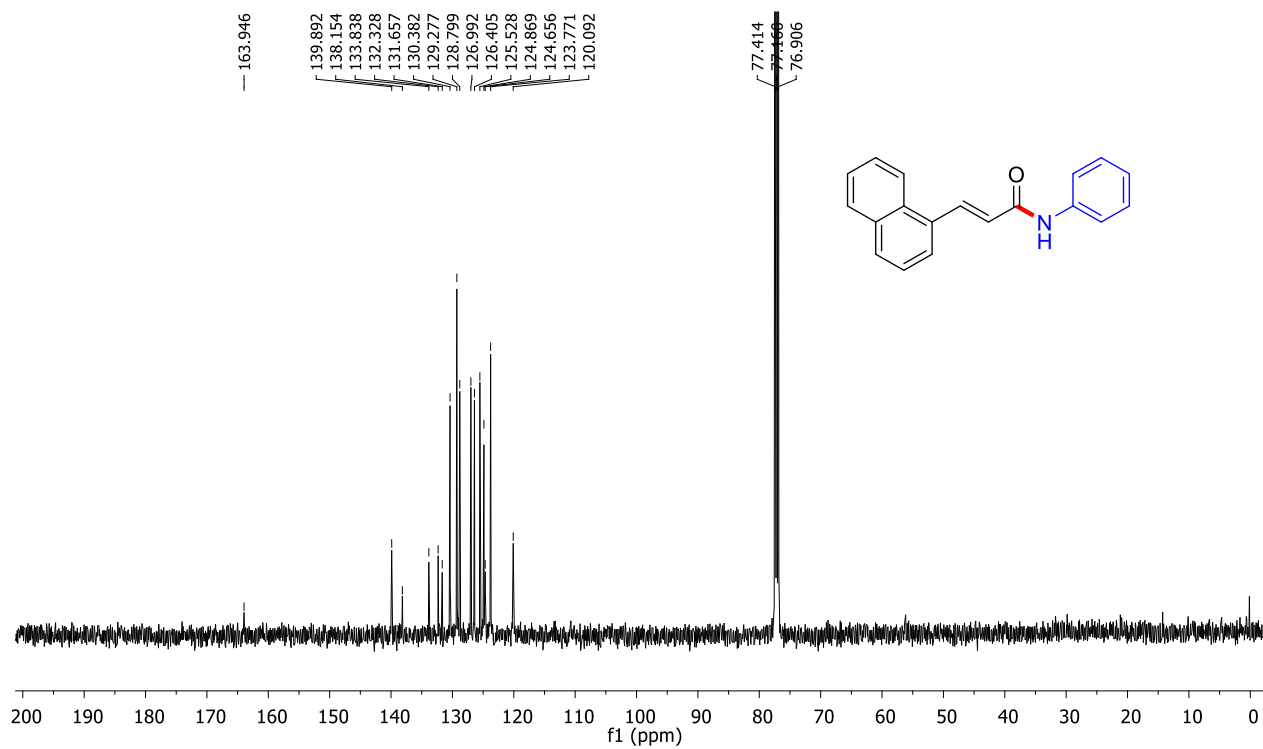

**(E)-3-(Furan-2-yl)-N-phenylacrylamide (3p):**

$^1\text{H}$  NMR (500 MHz,  $\text{CDCl}_3$ )

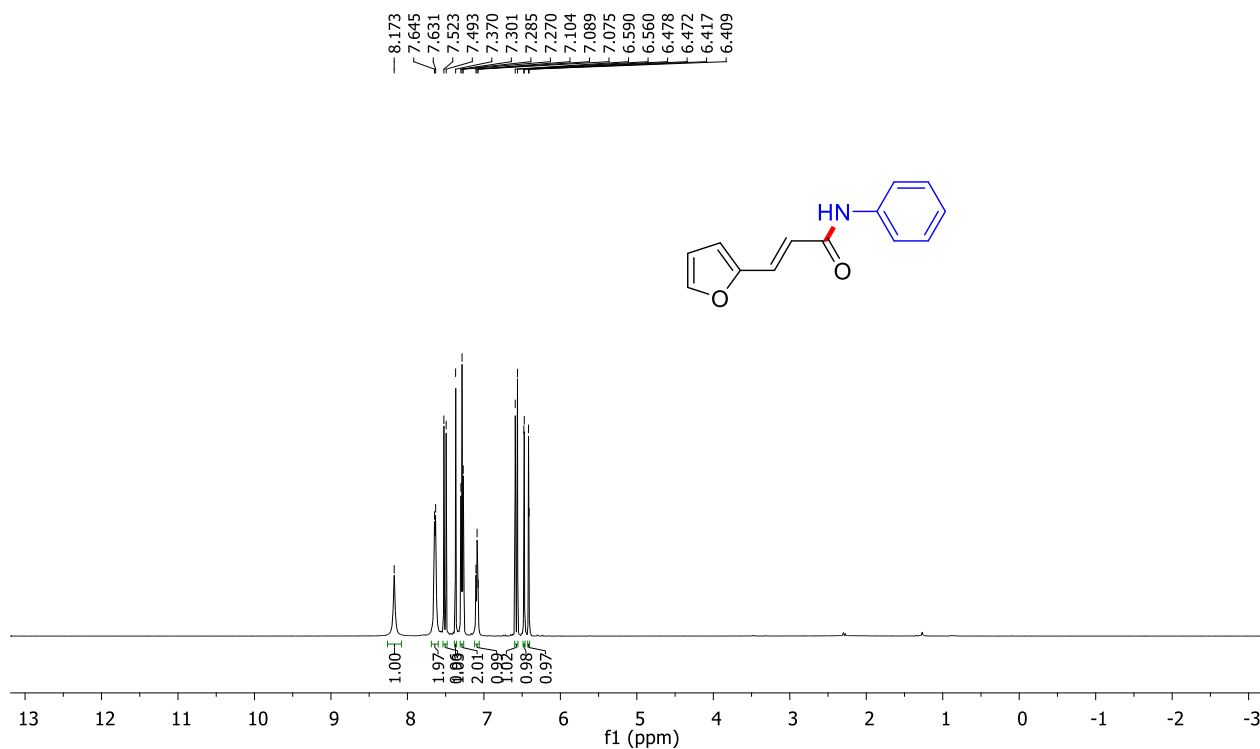

$^{13}\text{C}\{^1\text{H}\}$  NMR (126 MHz,  $\text{CDCl}_3$ )

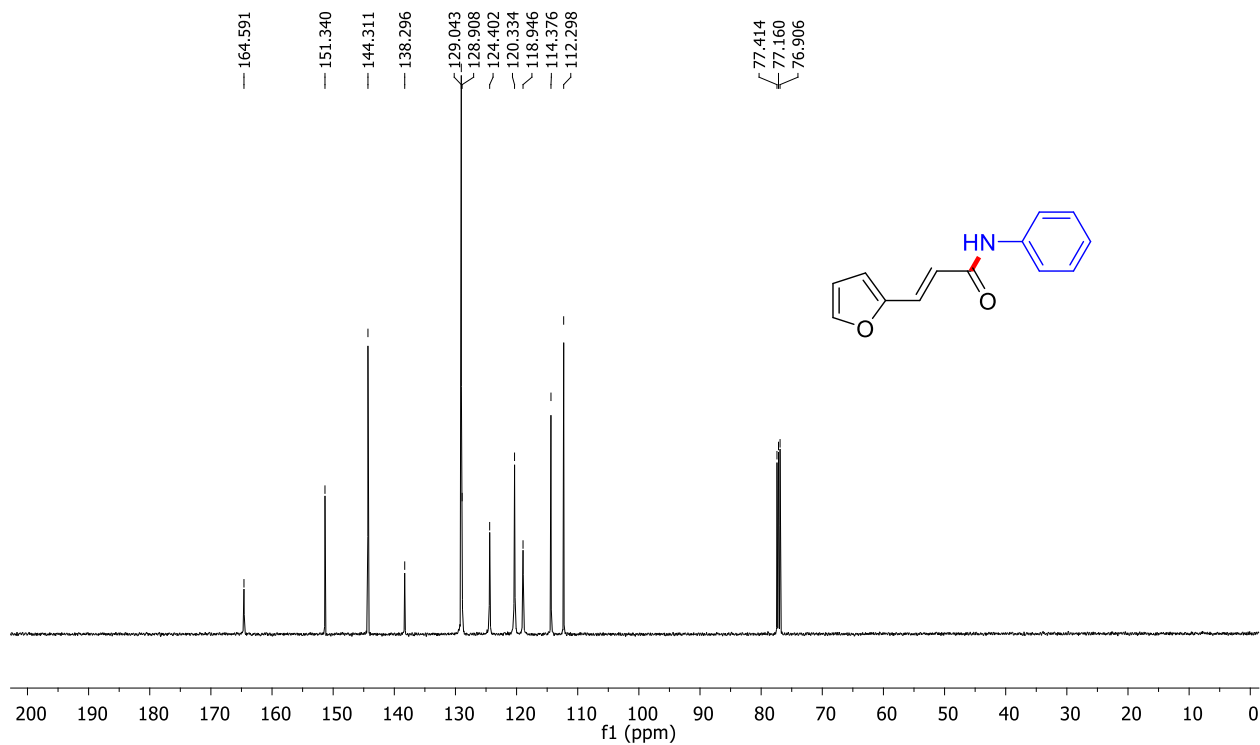

**(E)-N-Phenyl-3-(thiophen-2-yl)acrylamide (3q):**

$^1\text{H}$  NMR (500 MHz,  $\text{CDCl}_3$ )

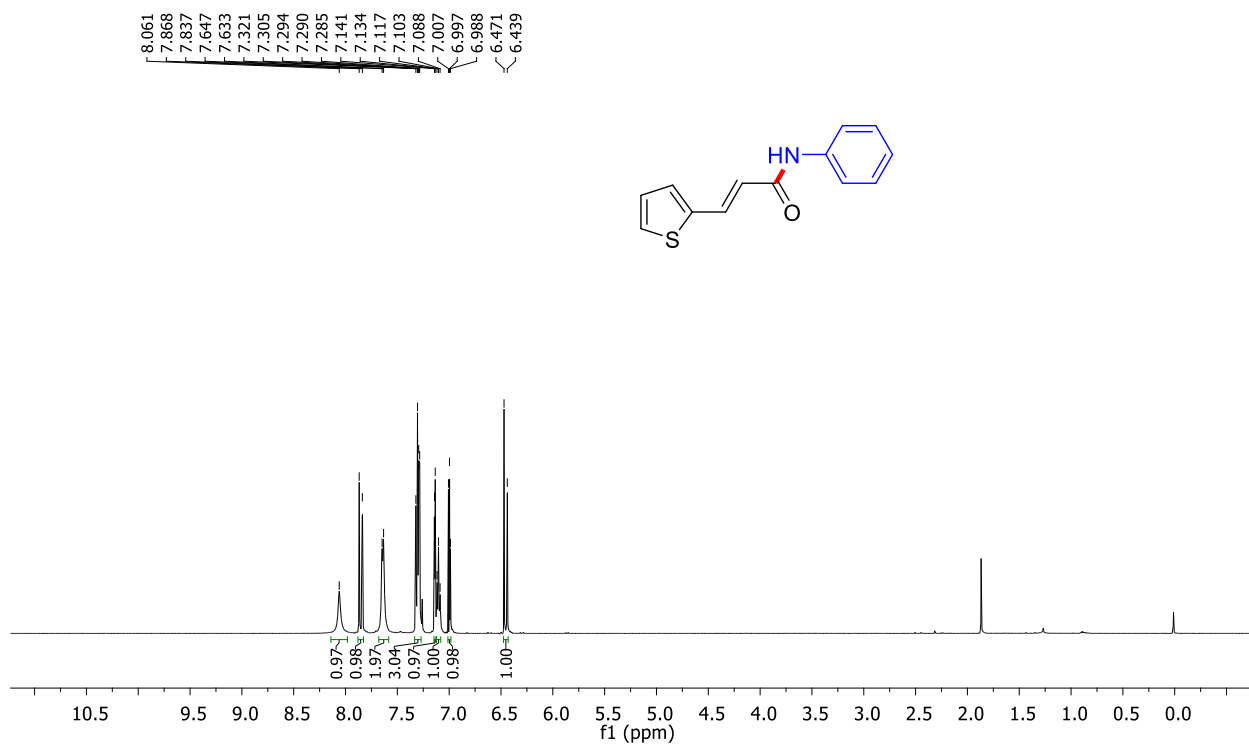

$^{13}\text{C}\{^1\text{H}\}$  NMR (126 MHz,  $\text{CDCl}_3$ )

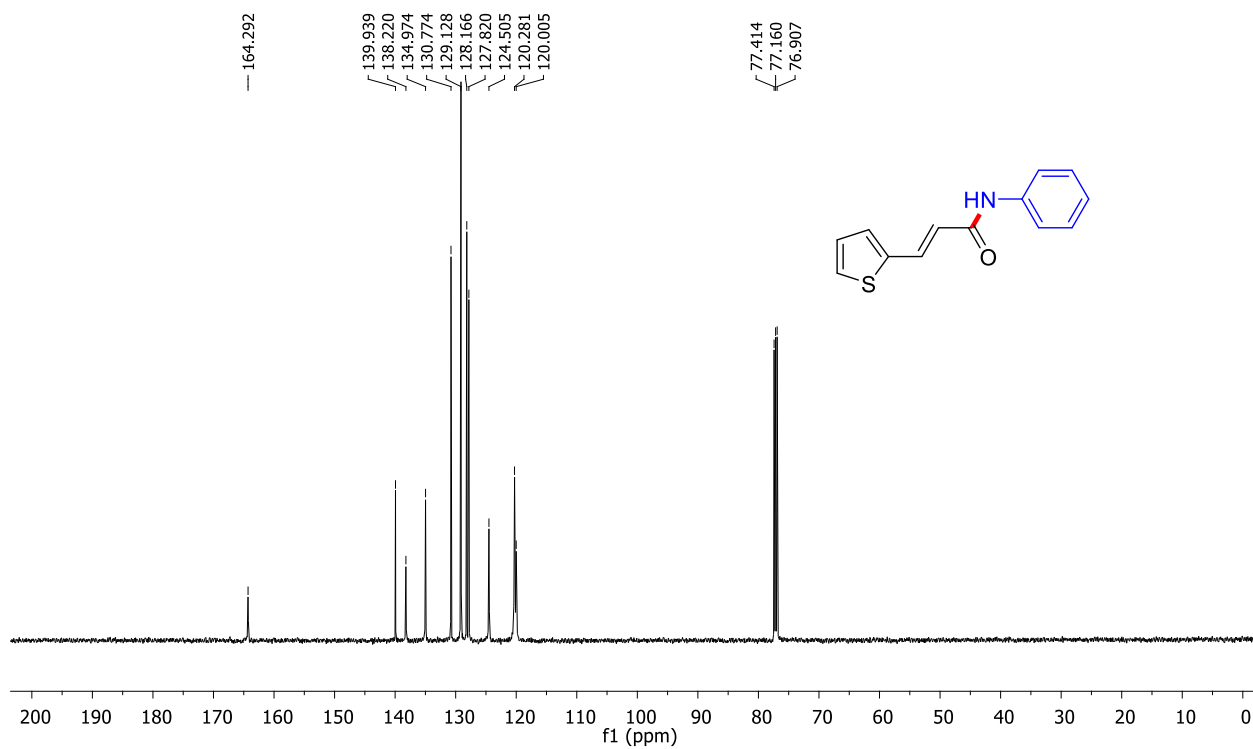

**(E)-N-Phenylbut-2-enamide (3r):**

$^1\text{H}$  NMR (500 MHz,  $\text{CDCl}_3$ )

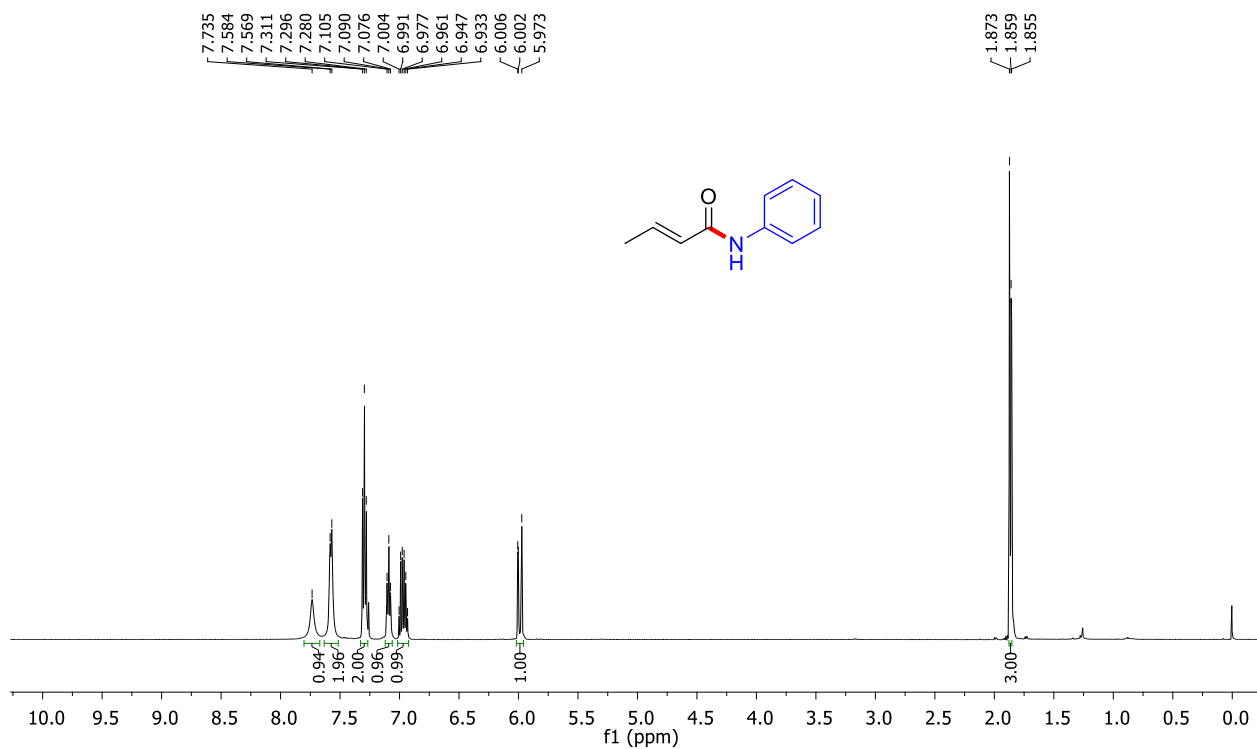

$^{13}\text{C}\{^1\text{H}\}$  NMR (126 MHz,  $\text{CDCl}_3$ )

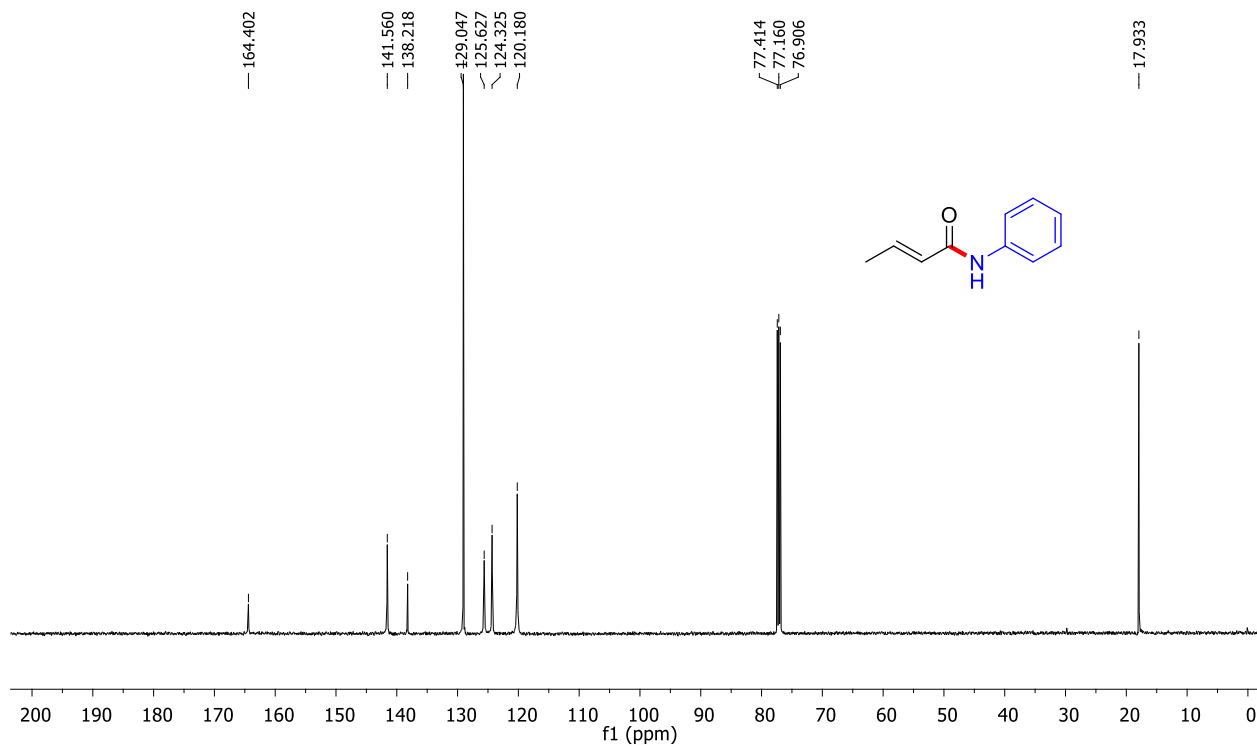

**(E)-N-Phenyl-oct-2-enamide (3s):**

$^1\text{H}$  NMR (500 MHz,  $\text{CDCl}_3$ )

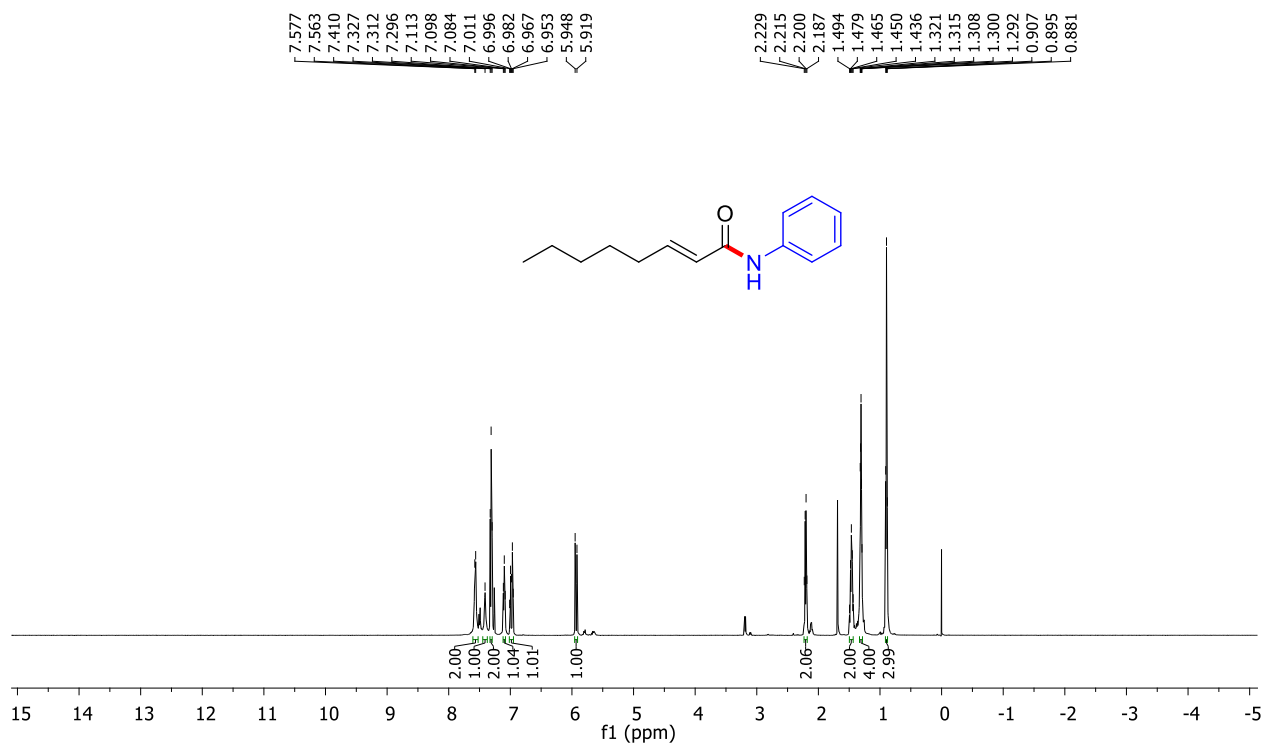

$^{13}\text{C}\{^1\text{H}\}$  NMR (126 MHz,  $\text{CDCl}_3$ )

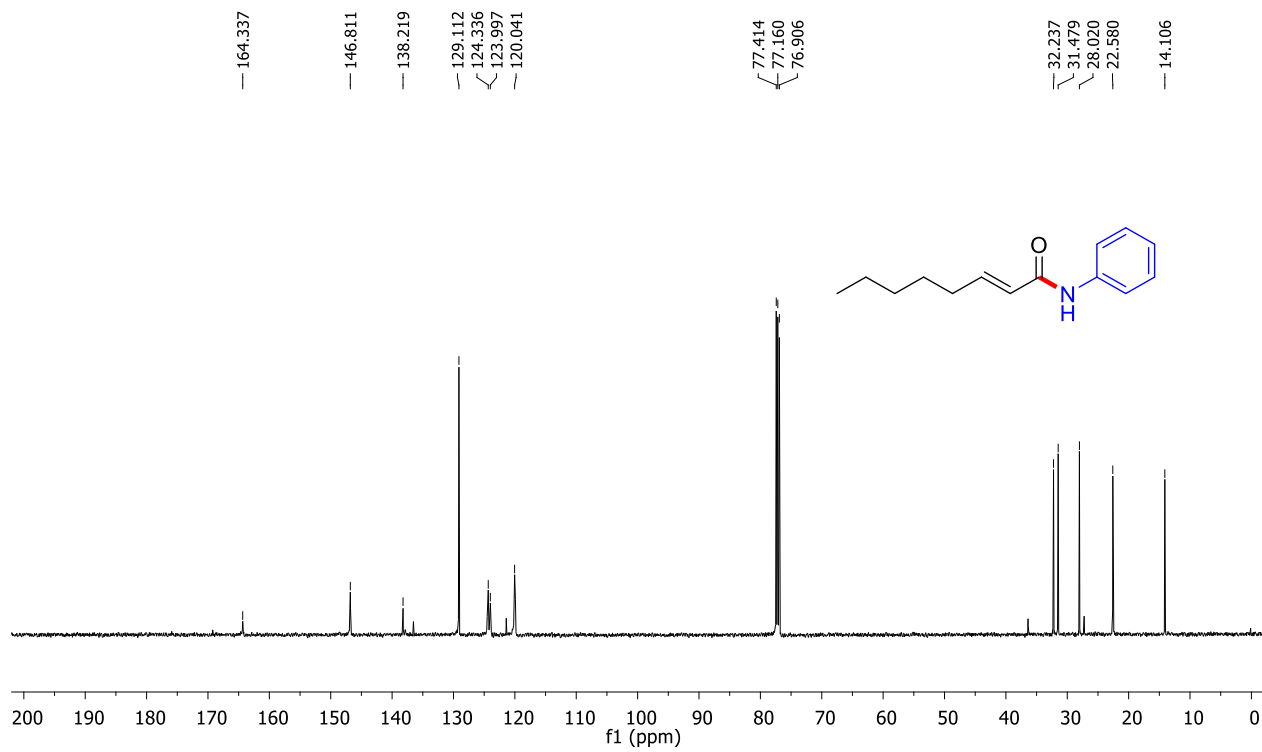

### *N*-(4-Ethylphenyl)cinnamamide (3t):

$^1\text{H}$  NMR (500 MHz,  $\text{CDCl}_3$ )

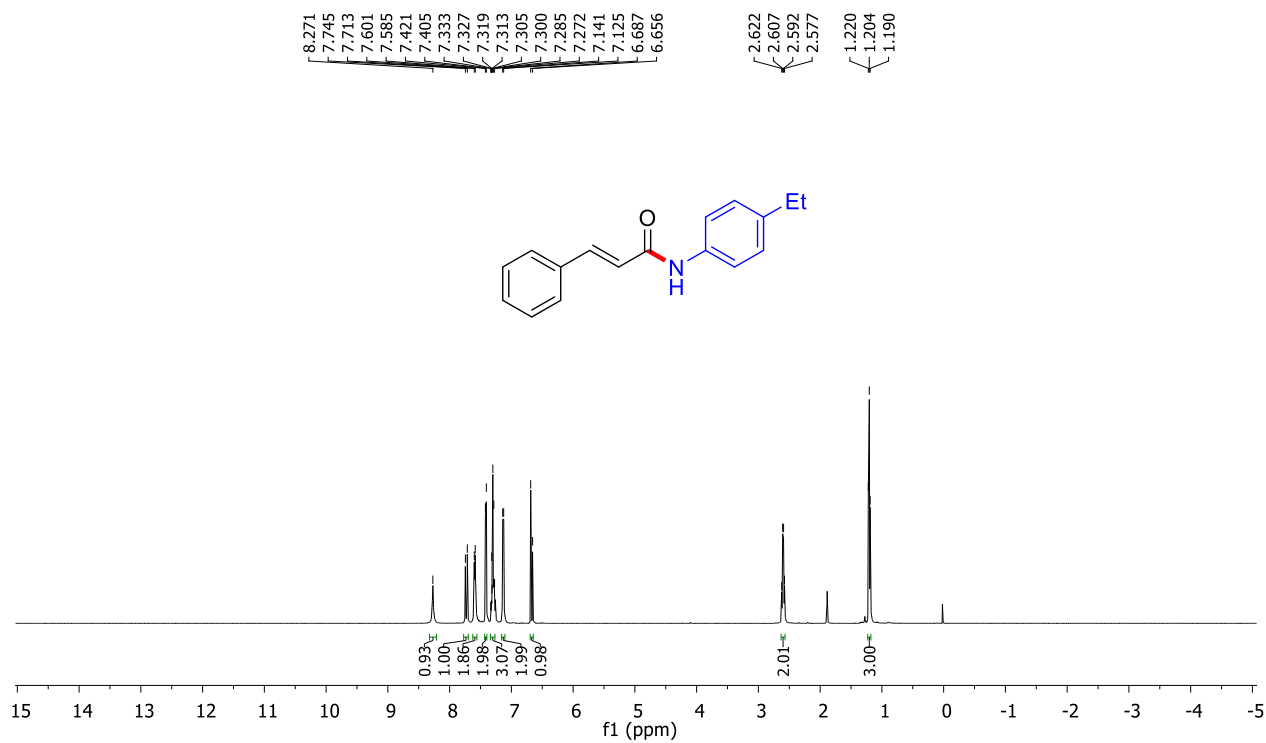

$^{13}\text{C}\{^1\text{H}\}$  NMR (126 MHz,  $\text{CDCl}_3$ )

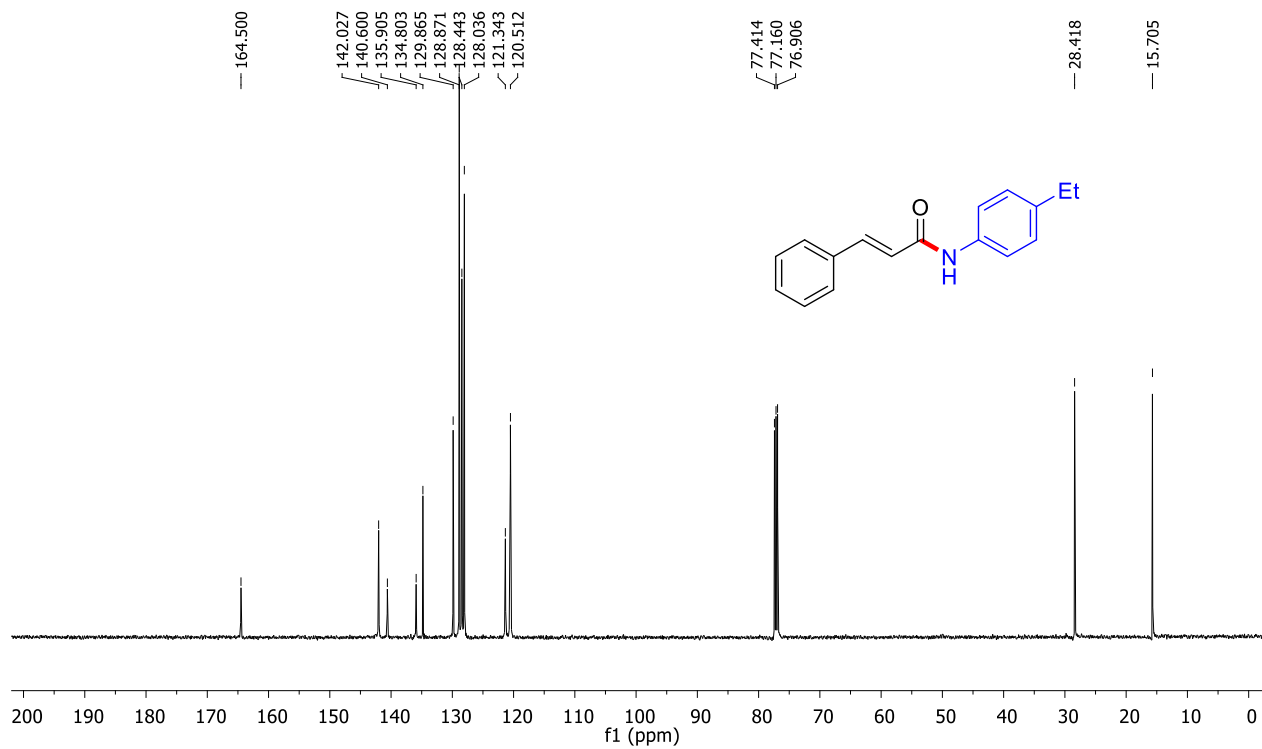

### *N*-(4-(*Tert*-butyl)phenyl)cinnamamide (**3u**):

$^1\text{H}$  NMR (500 MHz,  $\text{CDCl}_3$ )

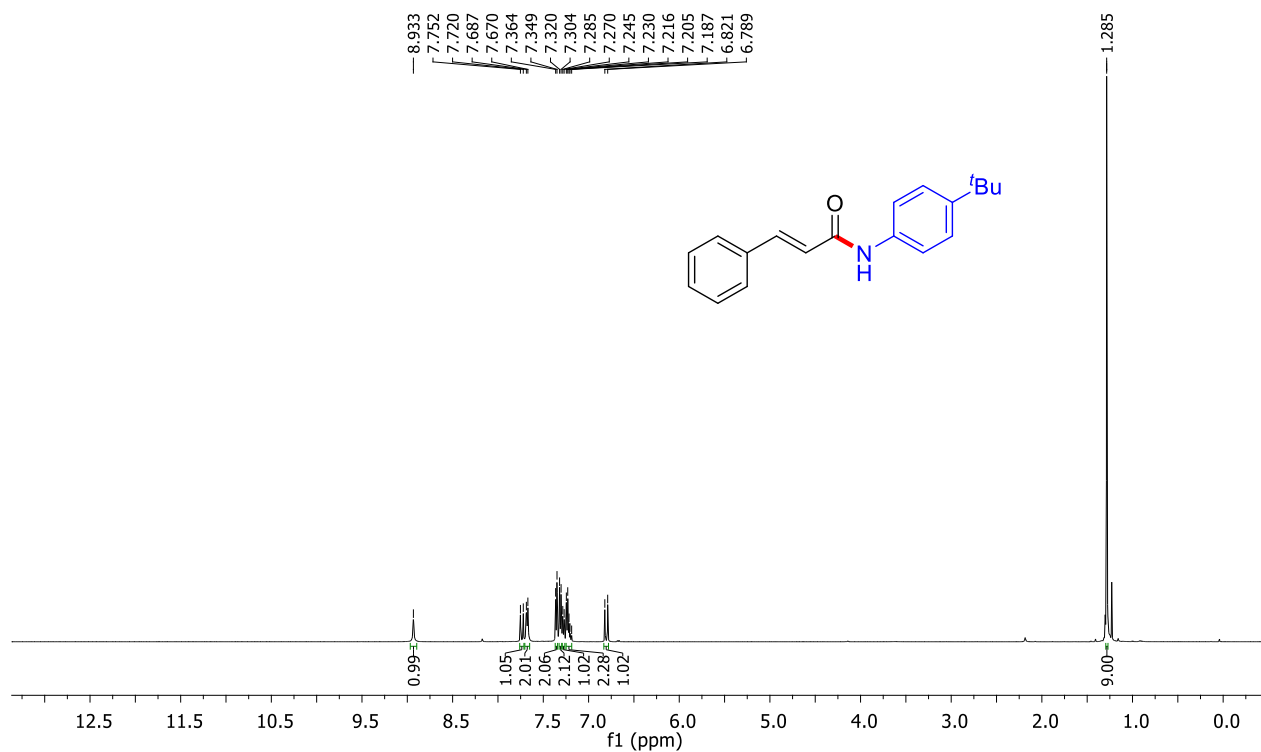

$^{13}\text{C}\{^1\text{H}\}$  NMR (126 MHz,  $\text{CDCl}_3$ )

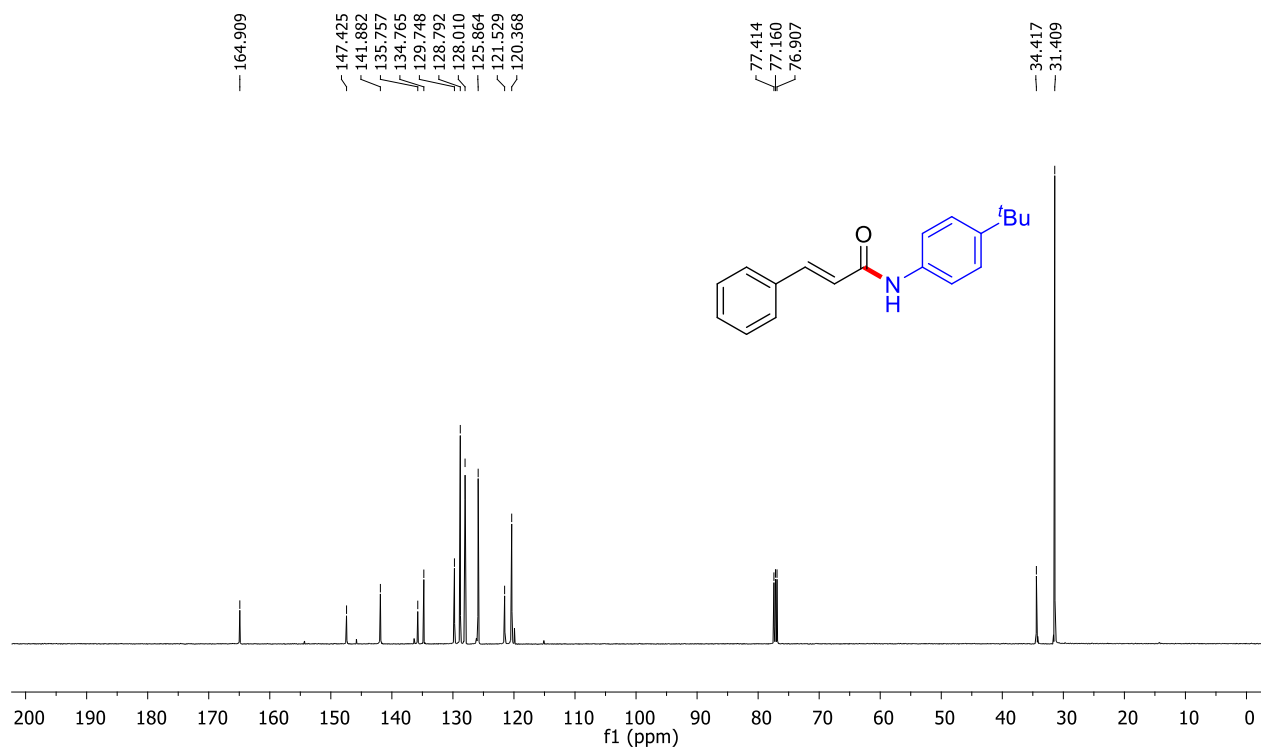

### ***N*-(4-Methoxyphenyl)cinnamamide (3v):**

<sup>1</sup>H NMR (500 MHz, CDCl<sub>3</sub>)

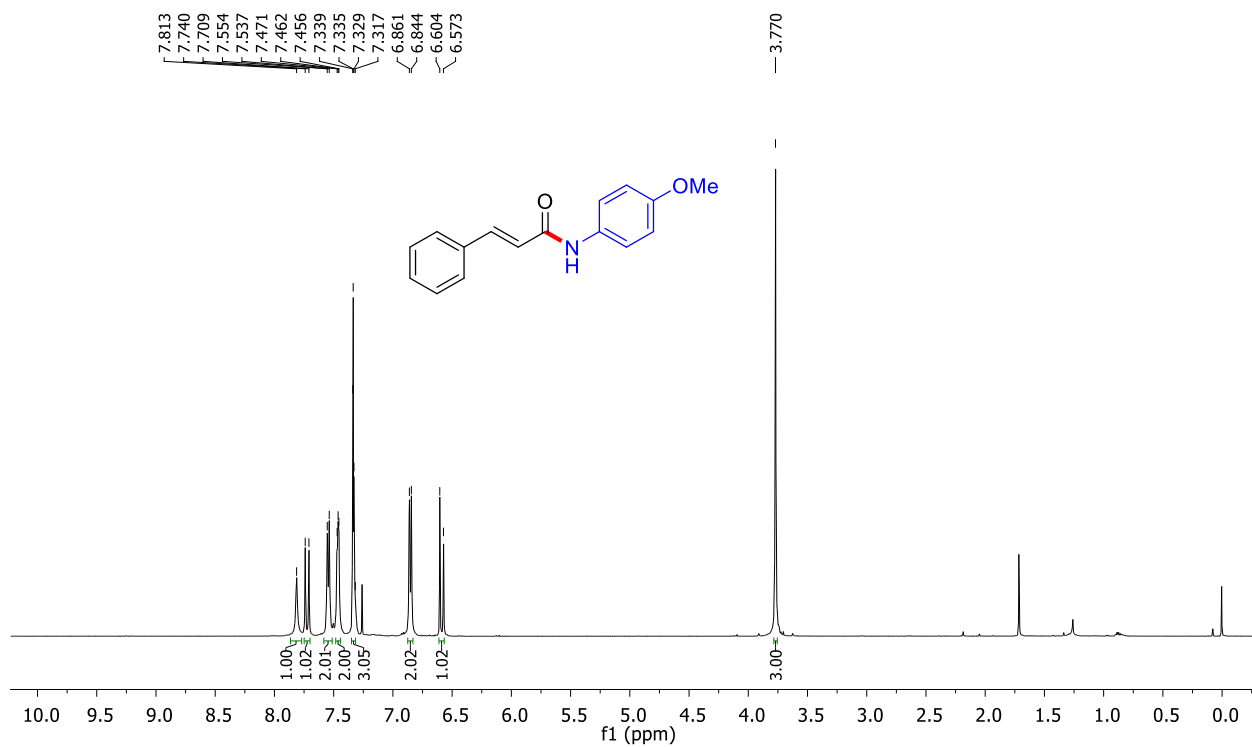

<sup>13</sup>C{<sup>1</sup>H} NMR (126 MHz, CDCl<sub>3</sub>)

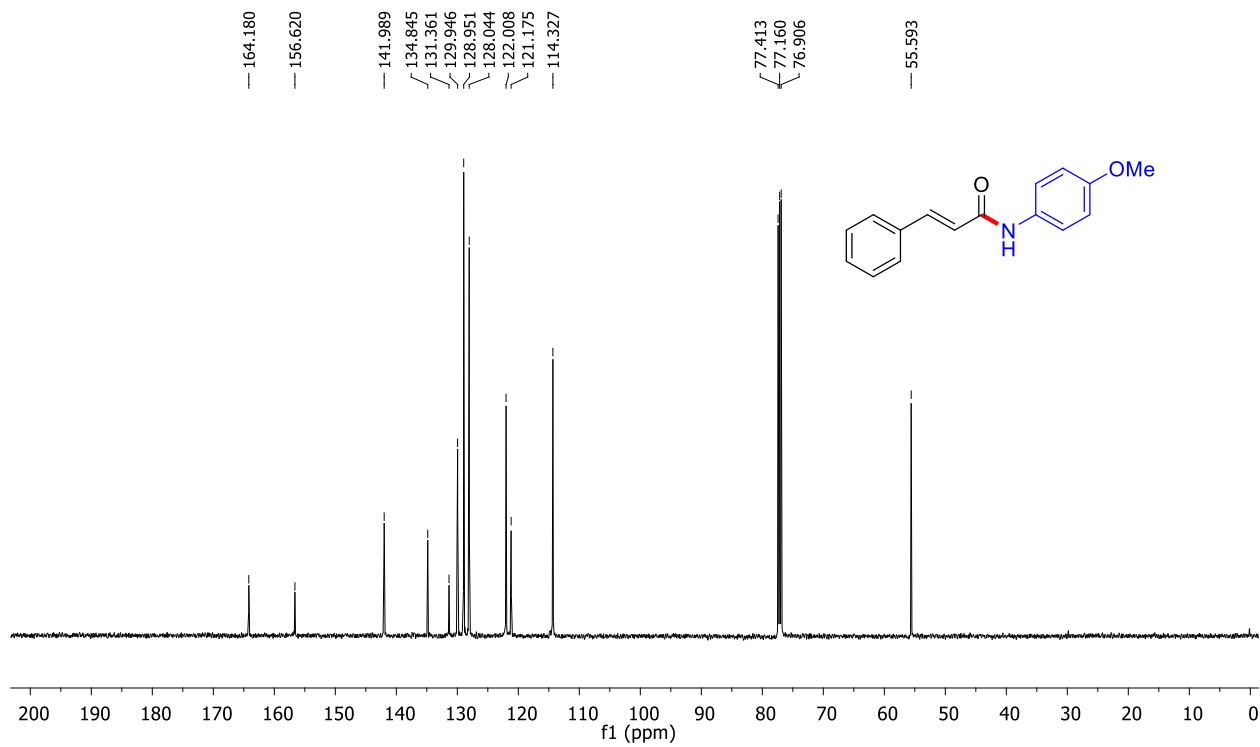

### *N*-(4-Fluorophenyl)cinnamamide (**3w**):

$^1\text{H}$  NMR (500 MHz,  $\text{CDCl}_3$ )

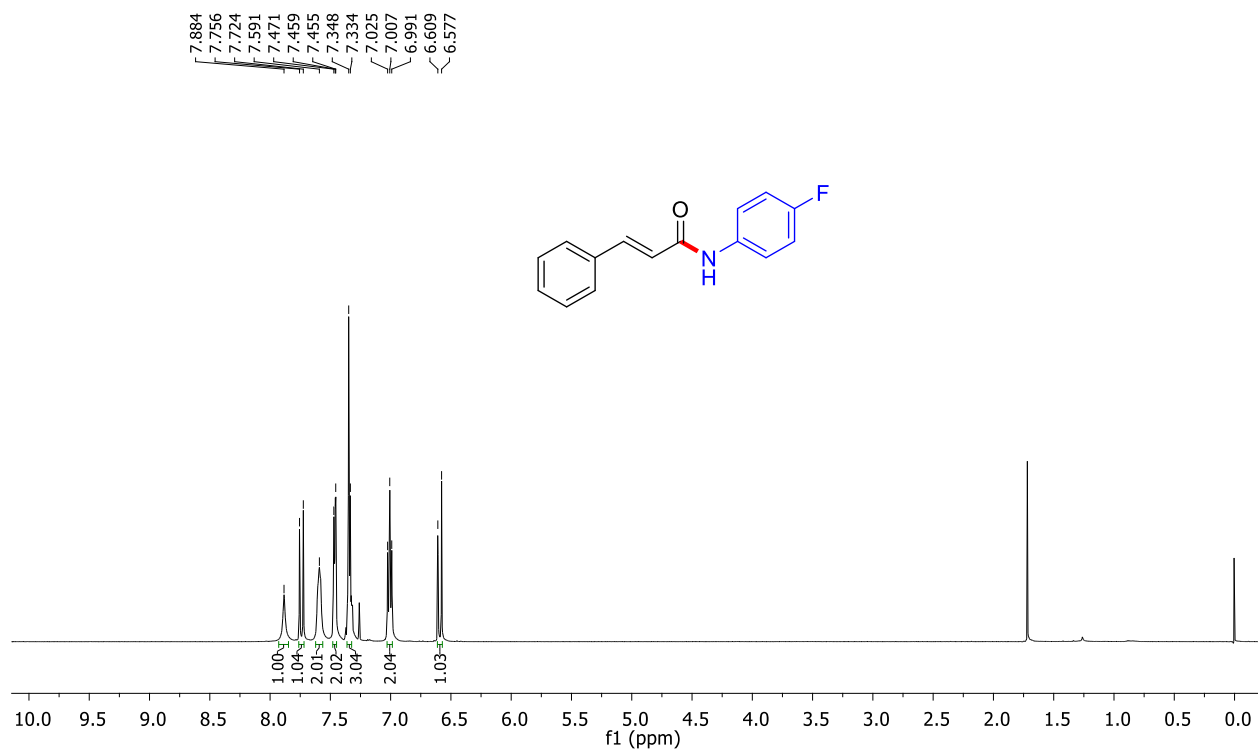

$^{13}\text{C}\{^1\text{H}\}$  NMR (126 MHz,  $\text{CDCl}_3$ )

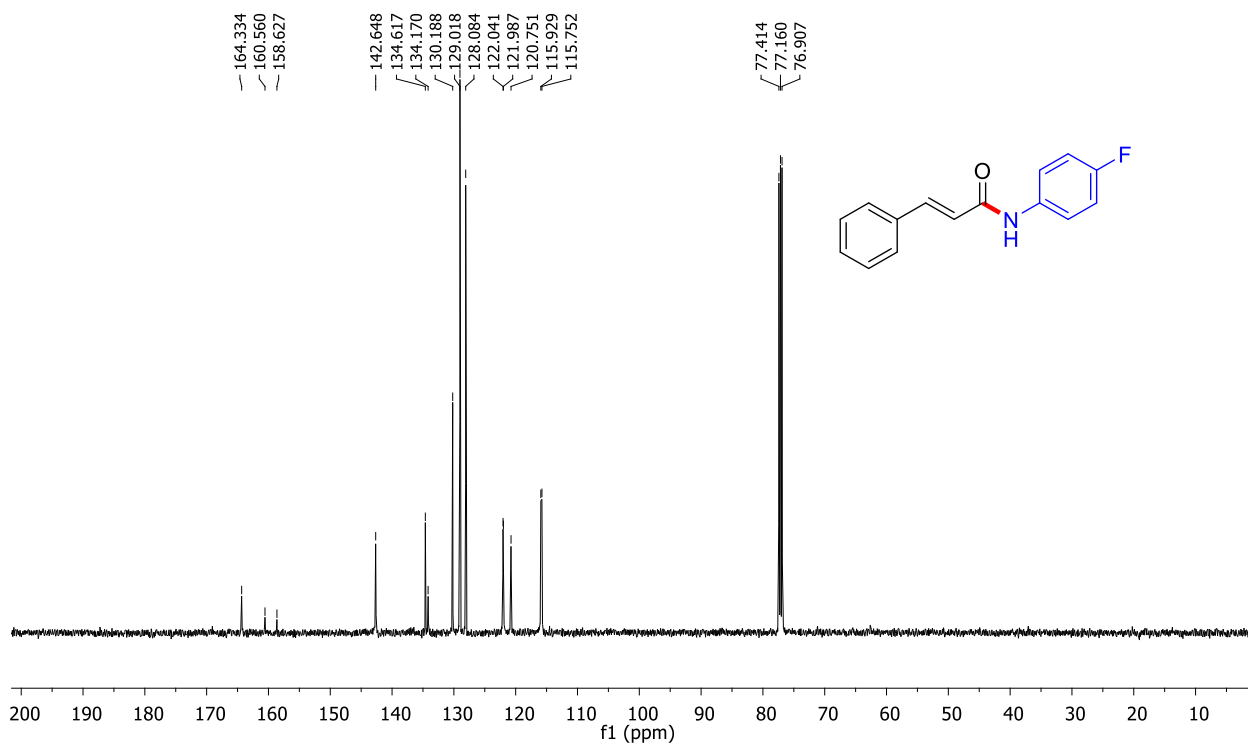

$^{19}\text{F}$  NMR (471 MHz,  $\text{CDCl}_3$ )

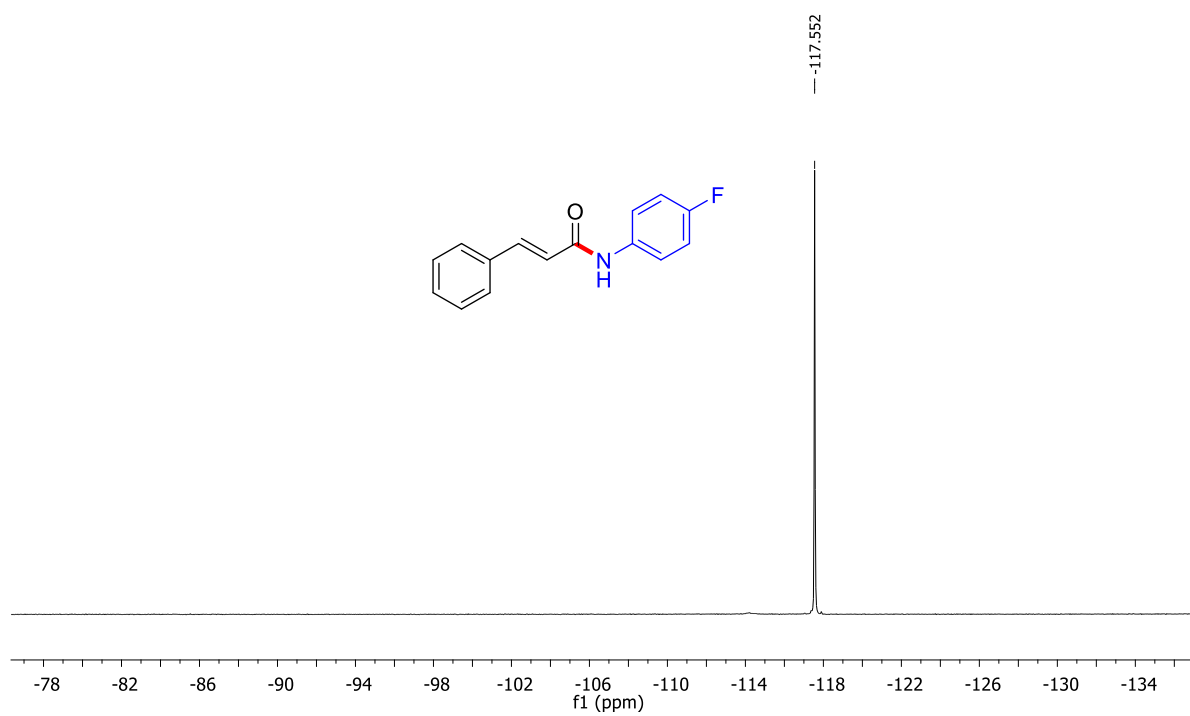

***N*-(3,5-Dimethylphenyl)cinnamamide (3x):**

$^1\text{H}$  NMR (500 MHz,  $\text{CDCl}_3$ )

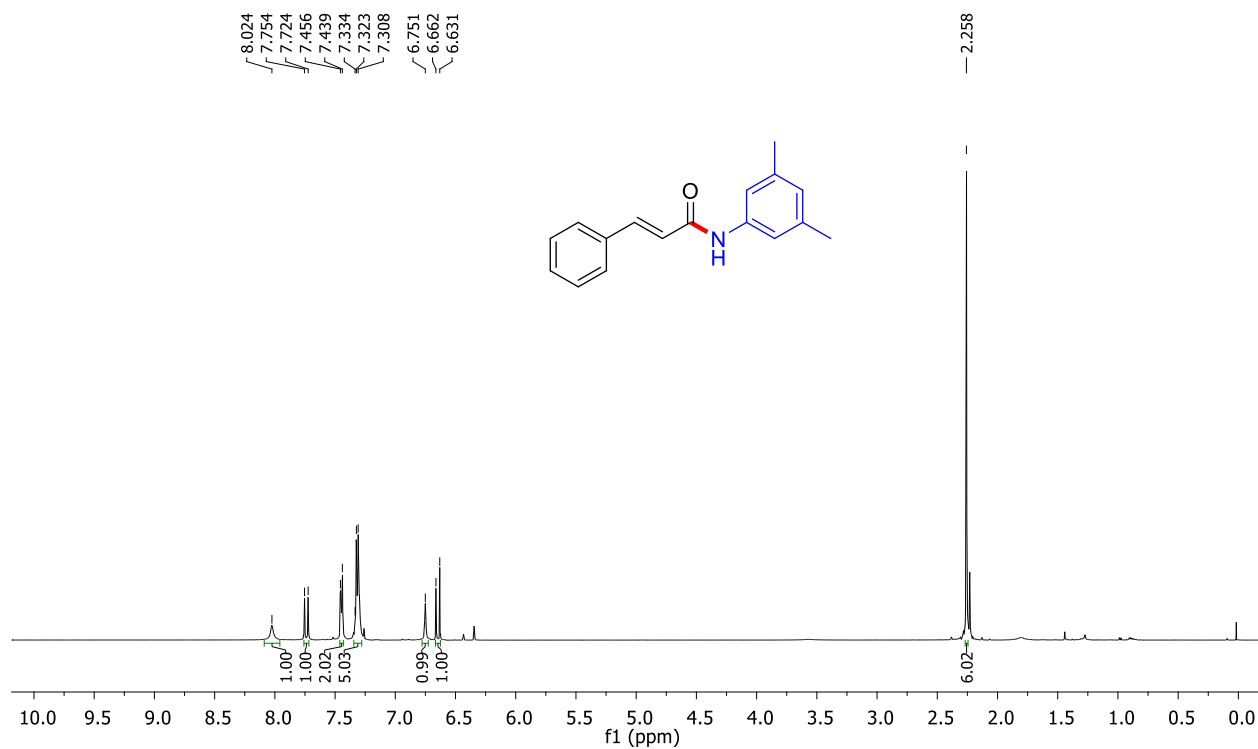

$^{13}\text{C}\{^1\text{H}\}$  NMR (126 MHz,  $\text{CDCl}_3$ )

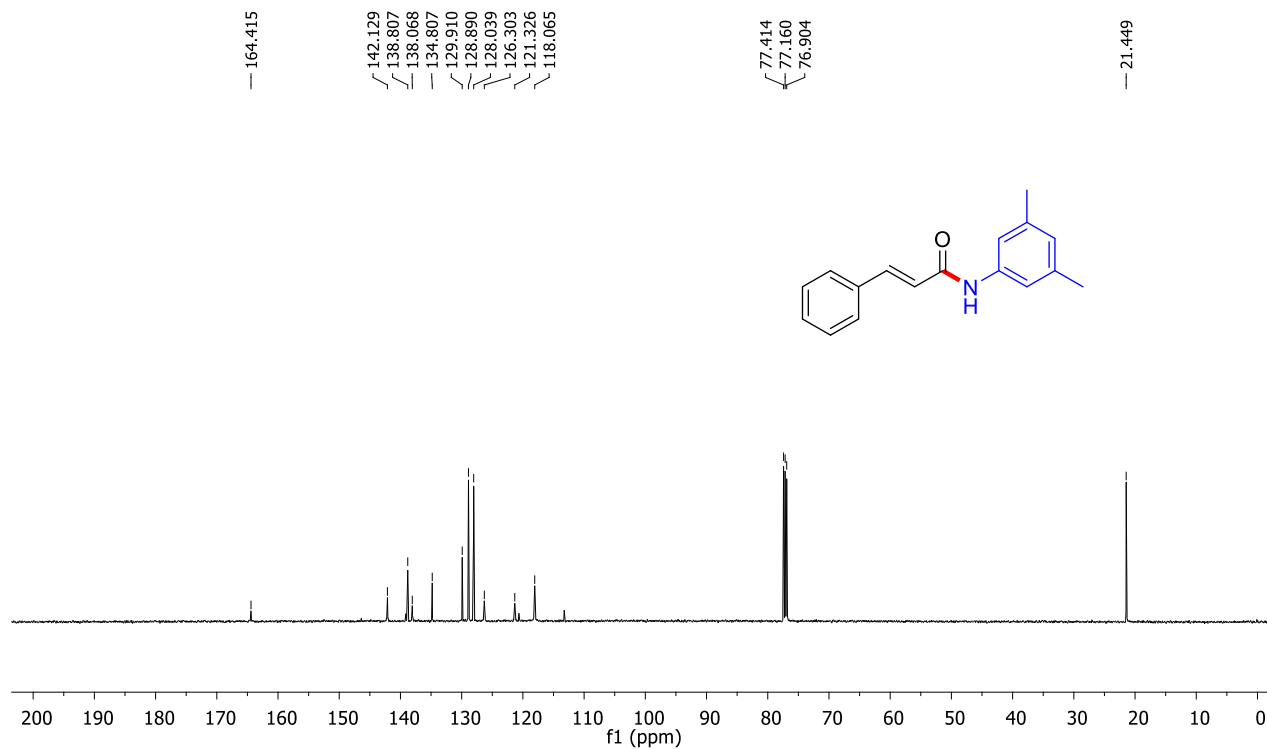

### *N*-(3-Chlorophenyl)cinnamamide (3y):

$^1\text{H}$  NMR (500 MHz,  $\text{CDCl}_3$ )

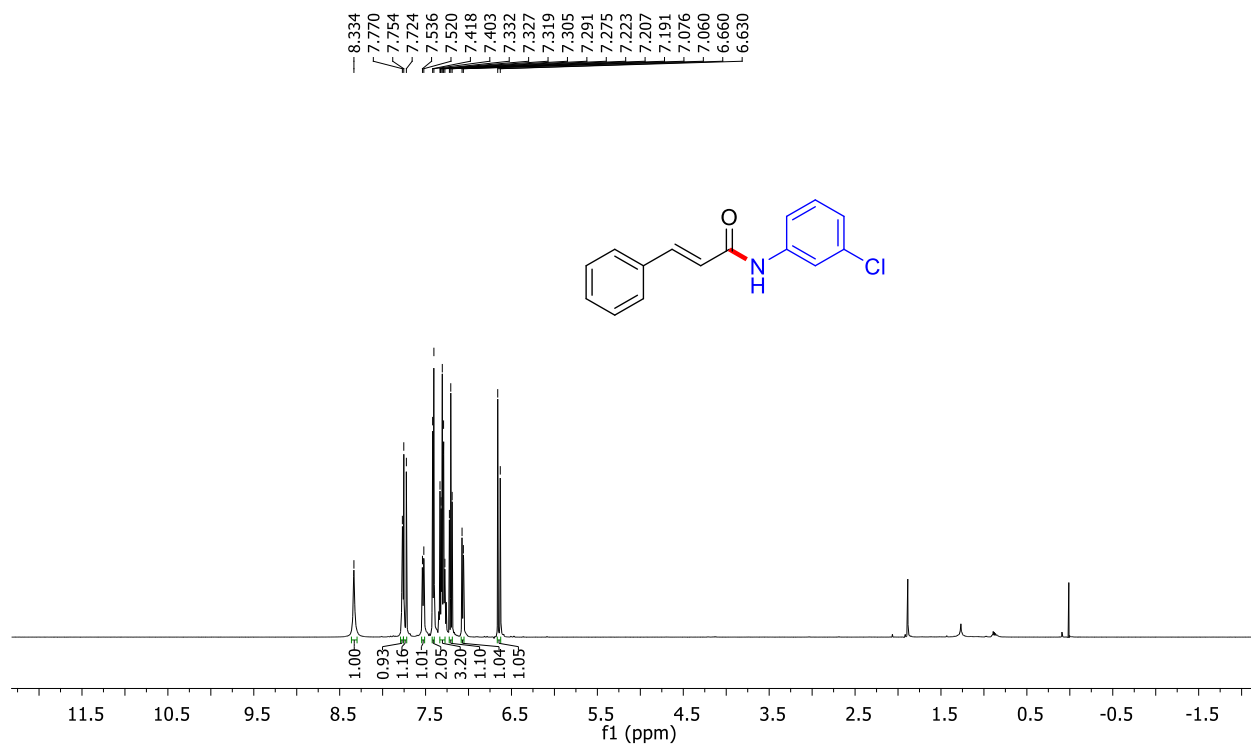

$^{13}\text{C}\{^1\text{H}\}$  NMR (126 MHz,  $\text{CDCl}_3$ )

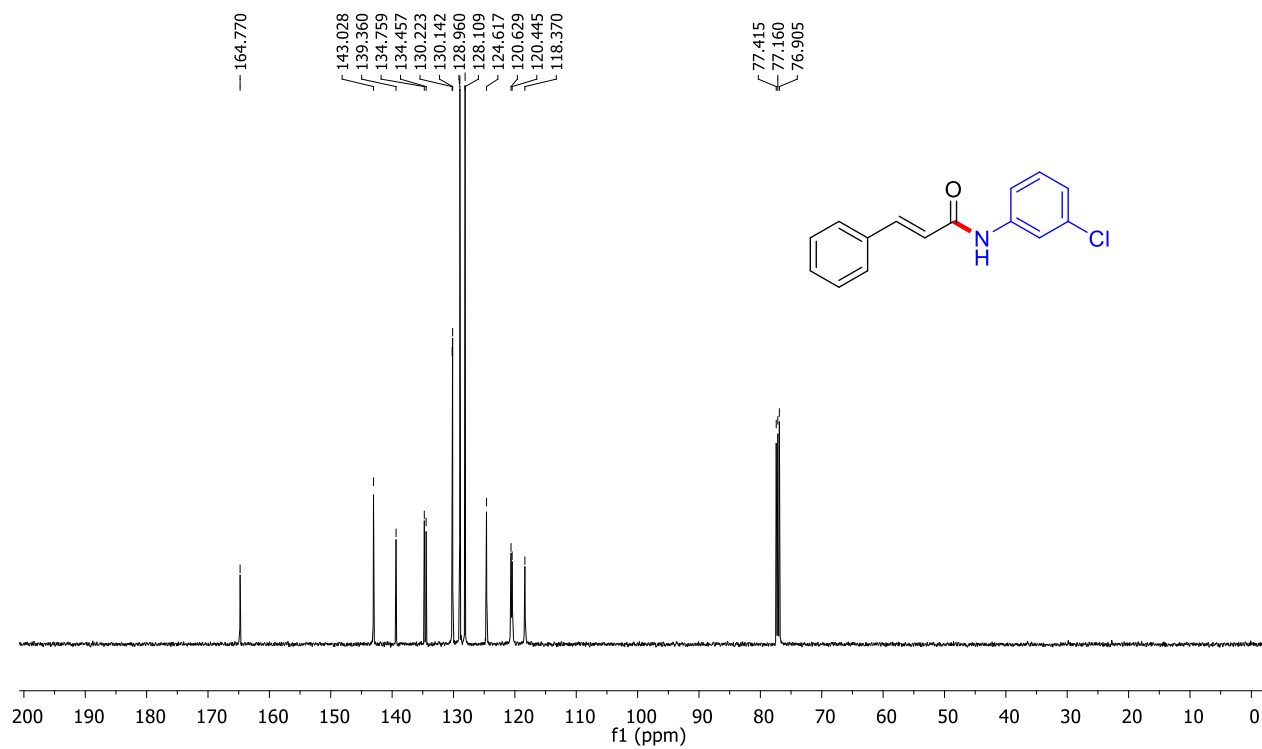

***N*-3-(Trifluoromethyl)phenylcinnamamide (3z):**

$^1\text{H}$  NMR (500 MHz,  $\text{CDCl}_3$ )

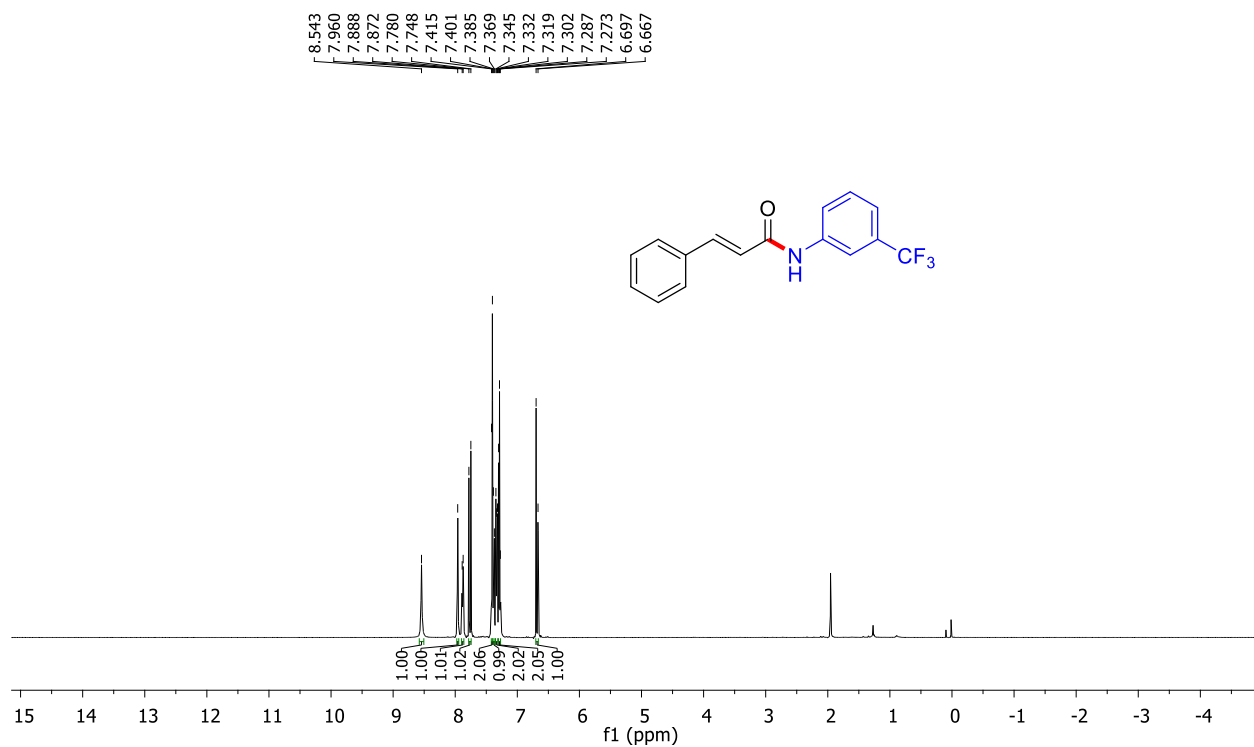

$^{13}\text{C}\{^1\text{H}\}$  NMR (126 MHz,  $\text{CDCl}_3$ )

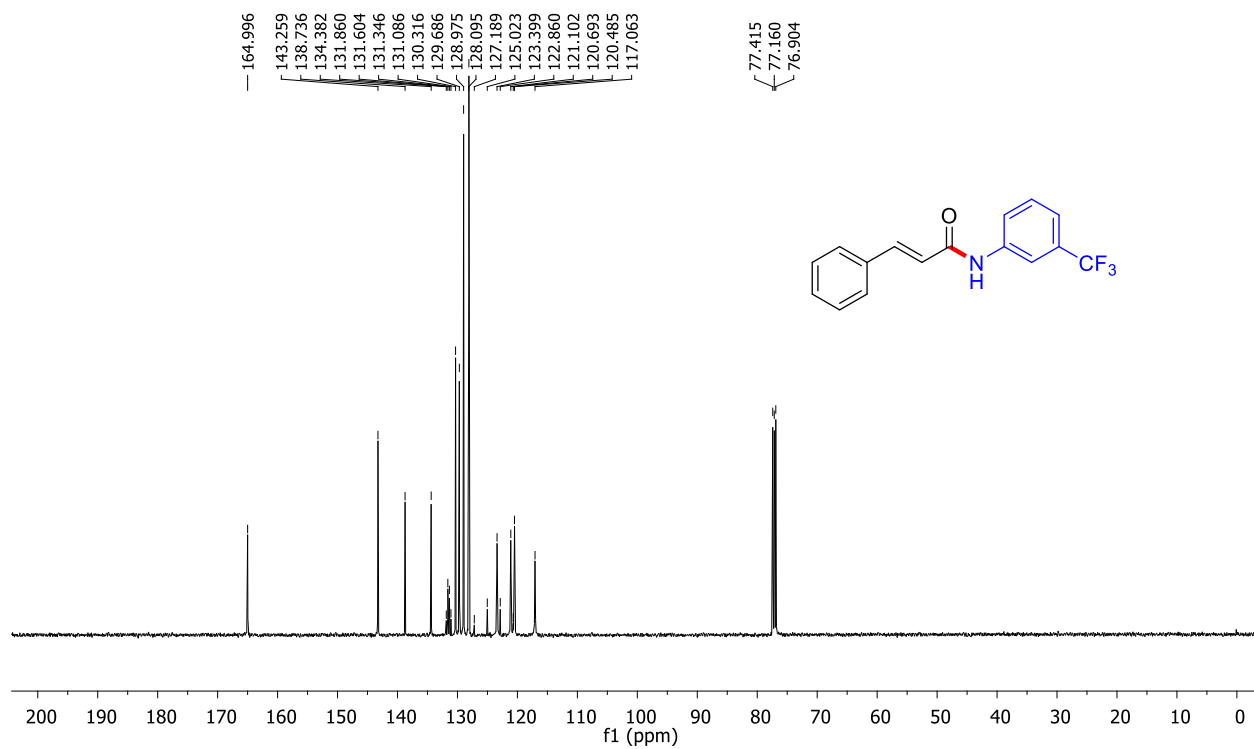

$^{19}\text{F}$  NMR (471 MHz,  $\text{CDCl}_3$ )

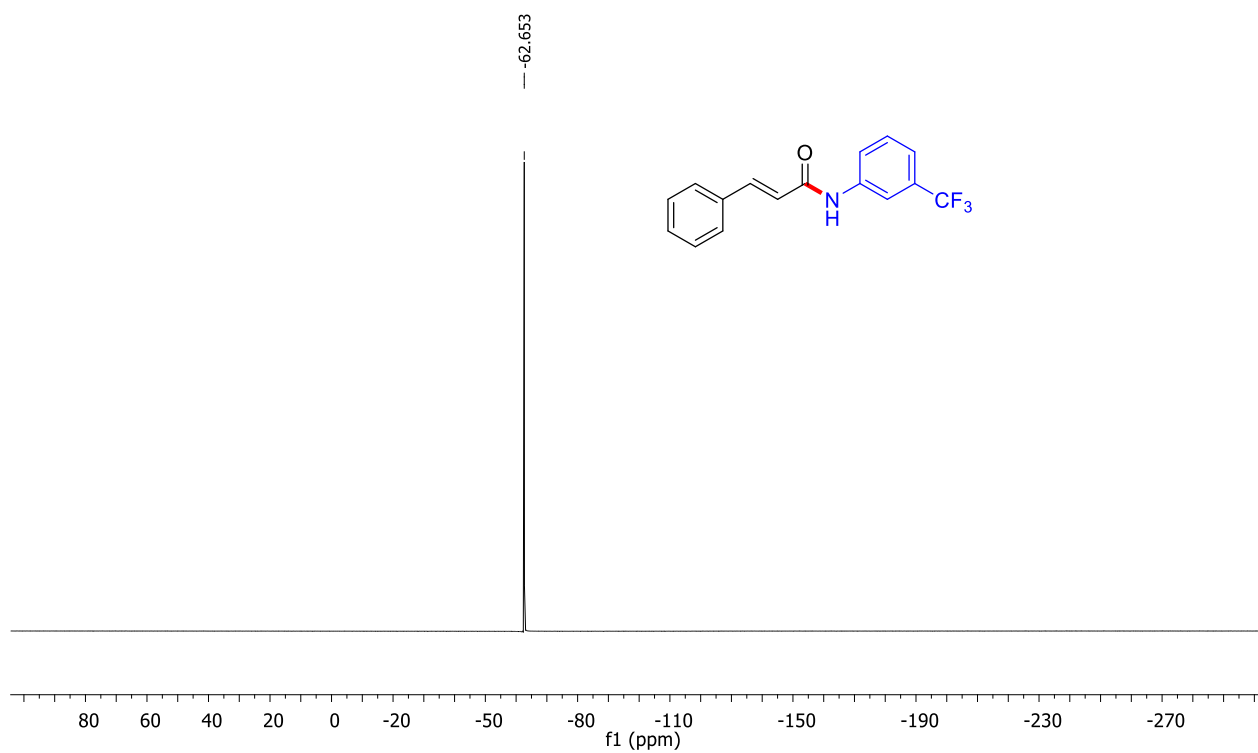

### *N*-(*o*-Tolyl)cinnamamide (3aa):

$^1\text{H}$  NMR (500 MHz,  $\text{CDCl}_3$ )

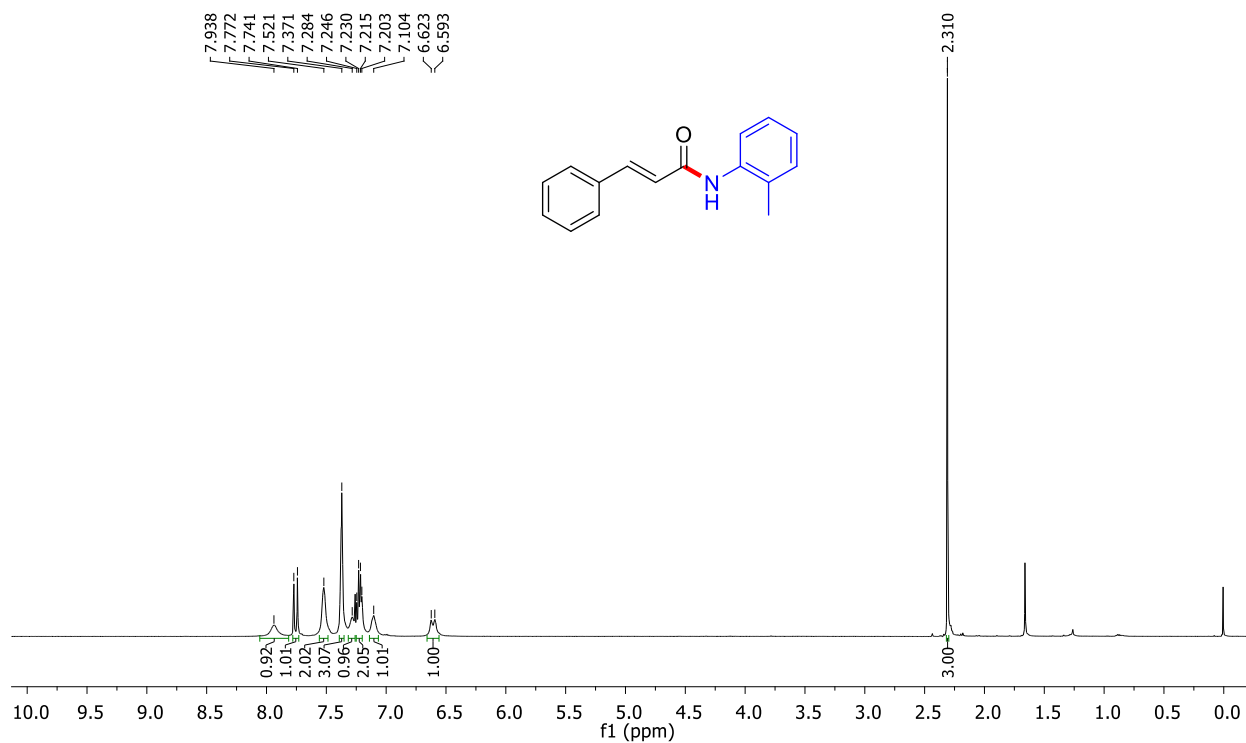

$^{13}\text{C}\{^1\text{H}\}$  NMR (126 MHz,  $\text{CDCl}_3$ )

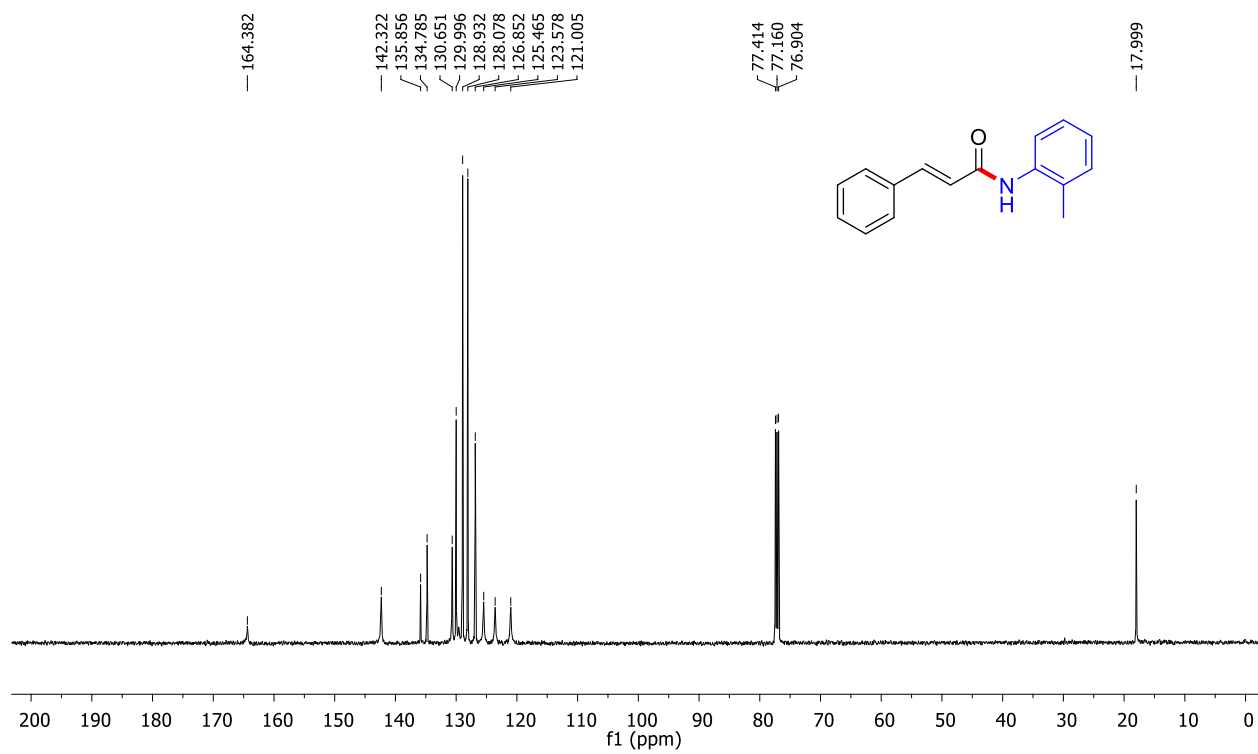

### *N*-Benzylcinnamamide (3ab):

$^1\text{H}$  NMR (500 MHz,  $\text{CDCl}_3$ )

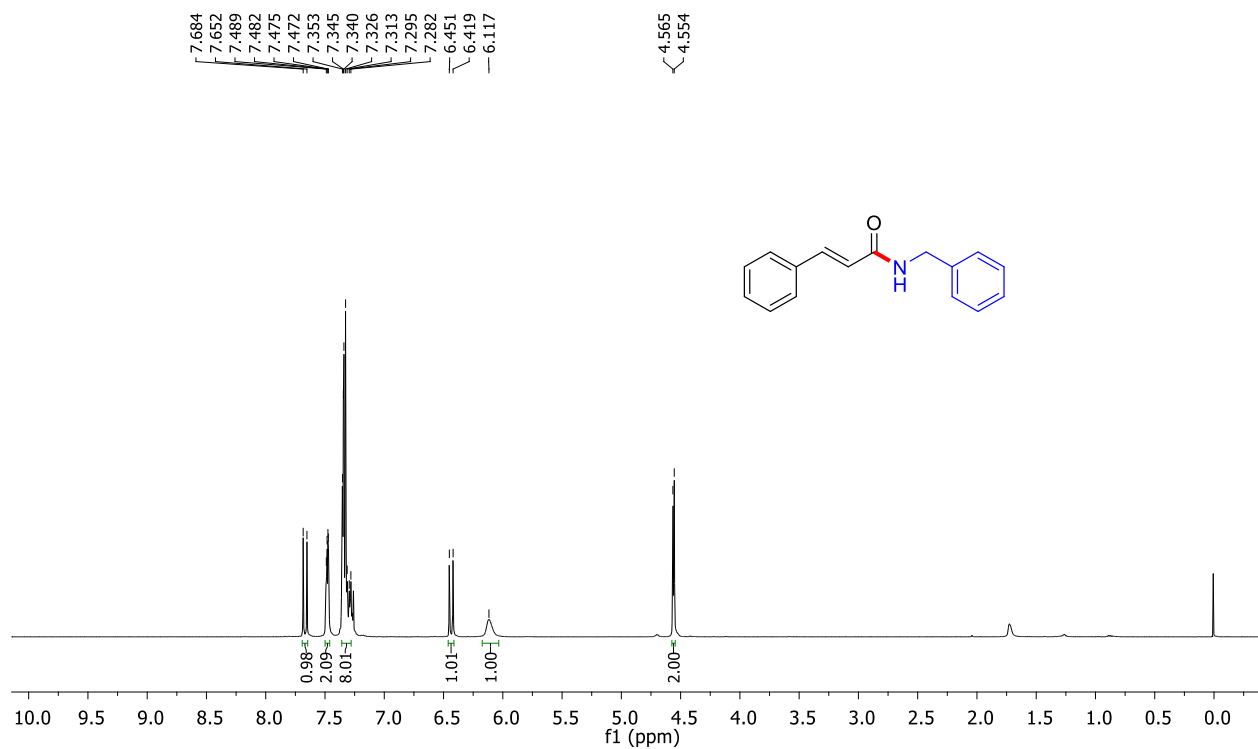

$^{13}\text{C}\{^1\text{H}\}$  NMR (126 MHz,  $\text{CDCl}_3$ )

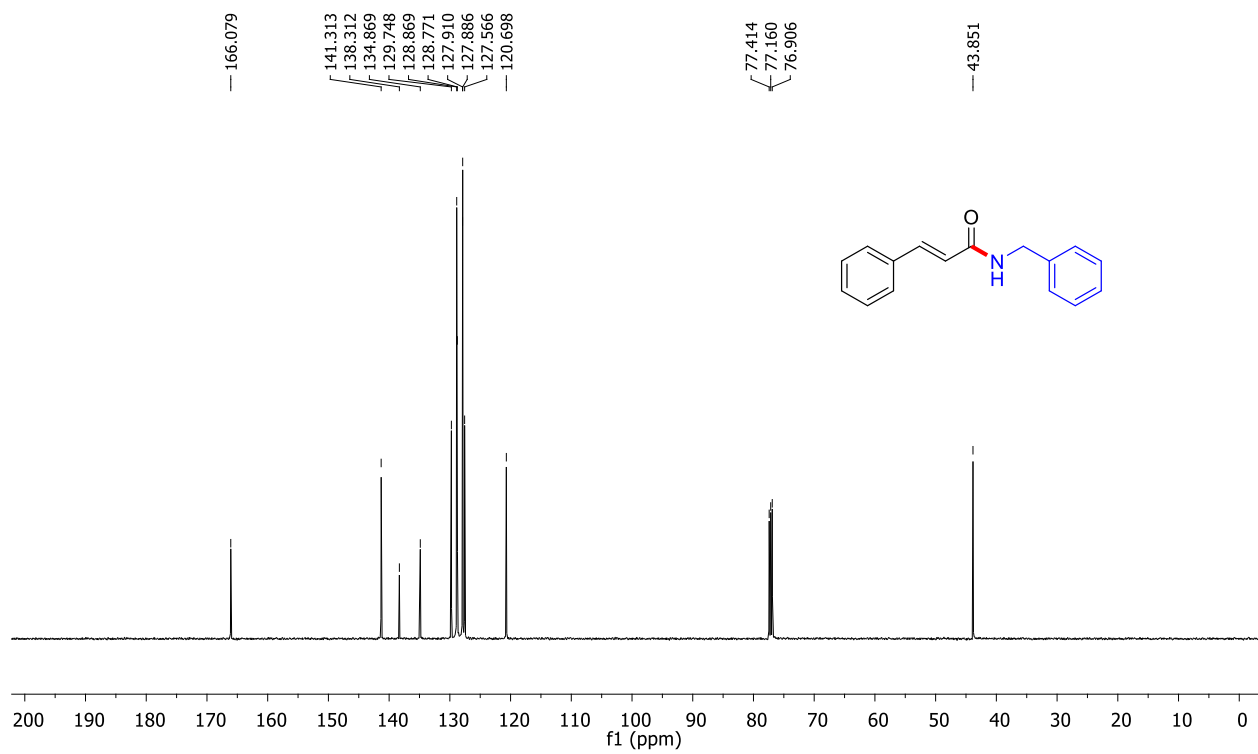

### ***N*-Phenethylcinnamamide (3ac):**

<sup>1</sup>H NMR (500 MHz, CDCl<sub>3</sub>)

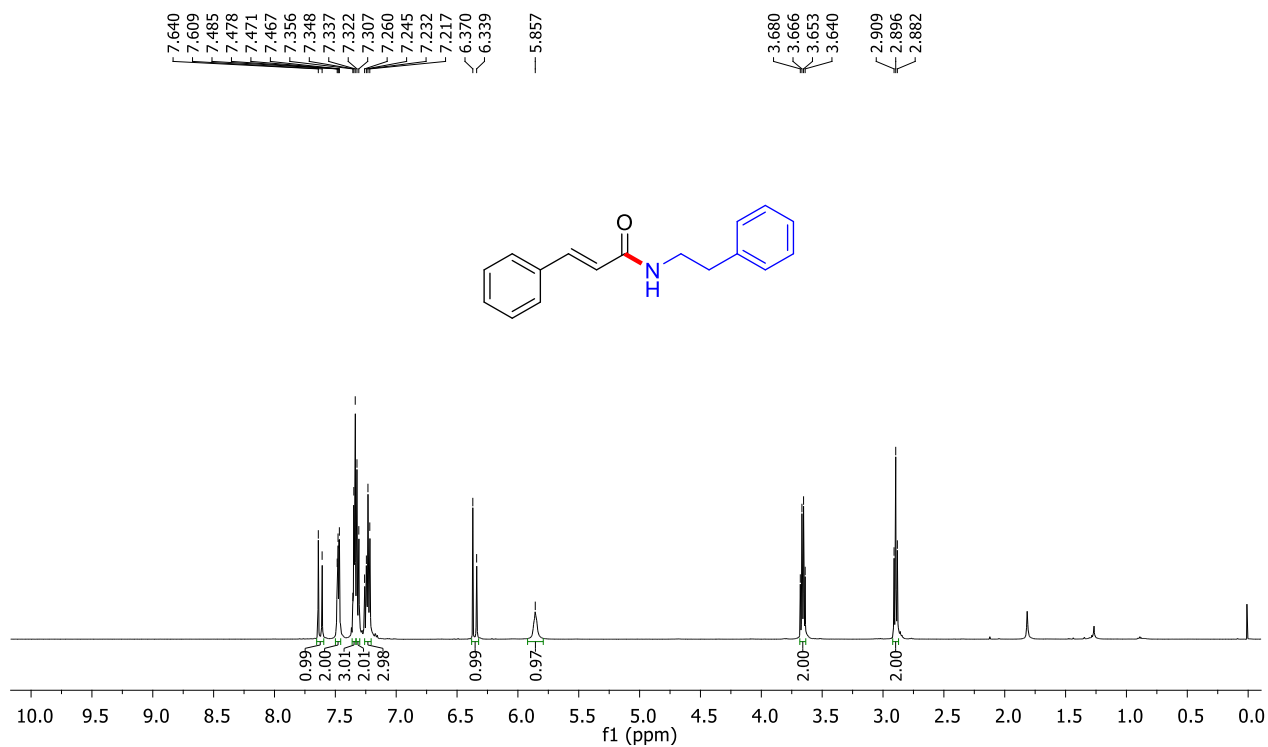

<sup>13</sup>C{<sup>1</sup>H} NMR (126 MHz, CDCl<sub>3</sub>)

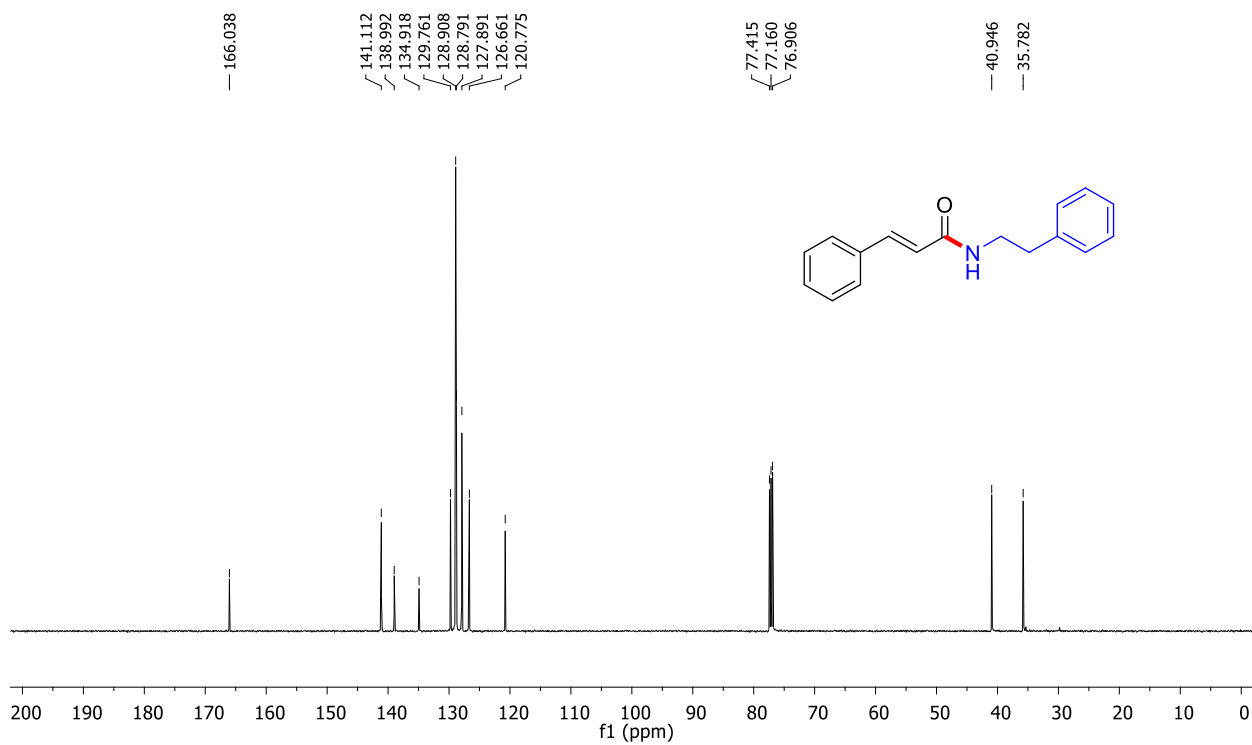

### ***N*-Cyclohexylcinnamamide (3ad):**

<sup>1</sup>H NMR (500 MHz, CDCl<sub>3</sub>)

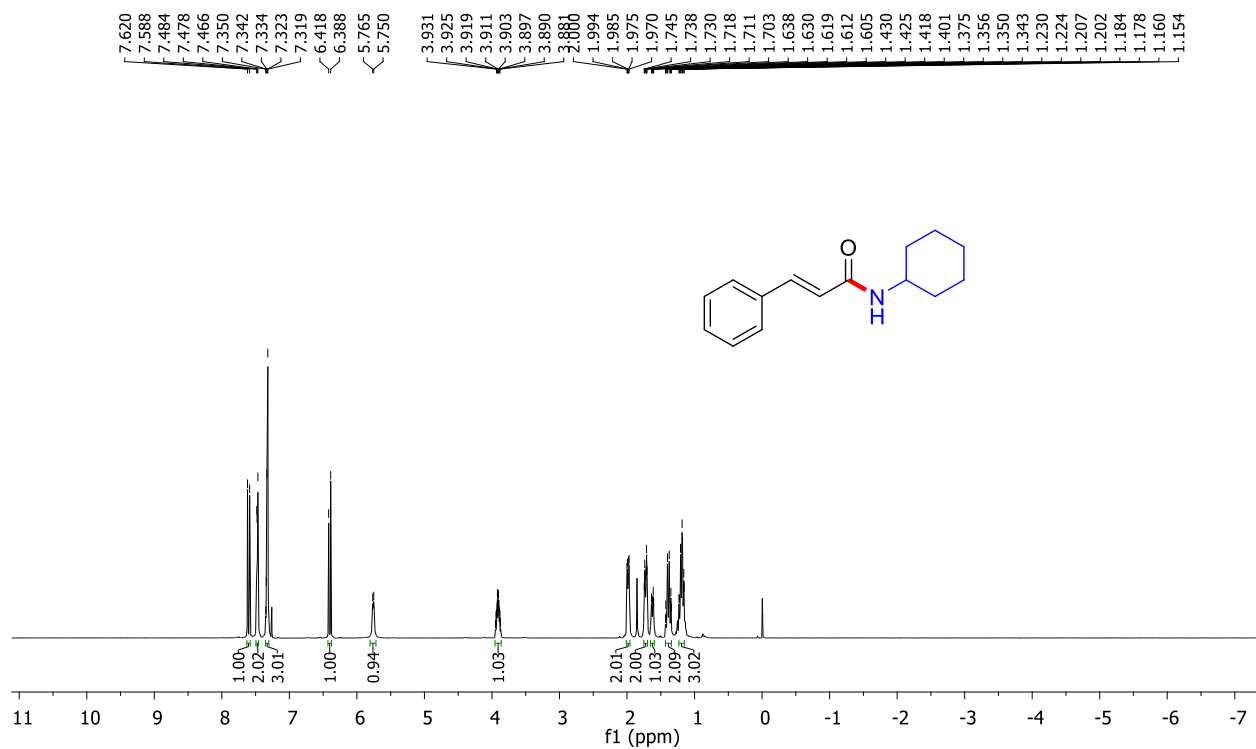

<sup>13</sup>C{<sup>1</sup>H} NMR (126 MHz, CDCl<sub>3</sub>)

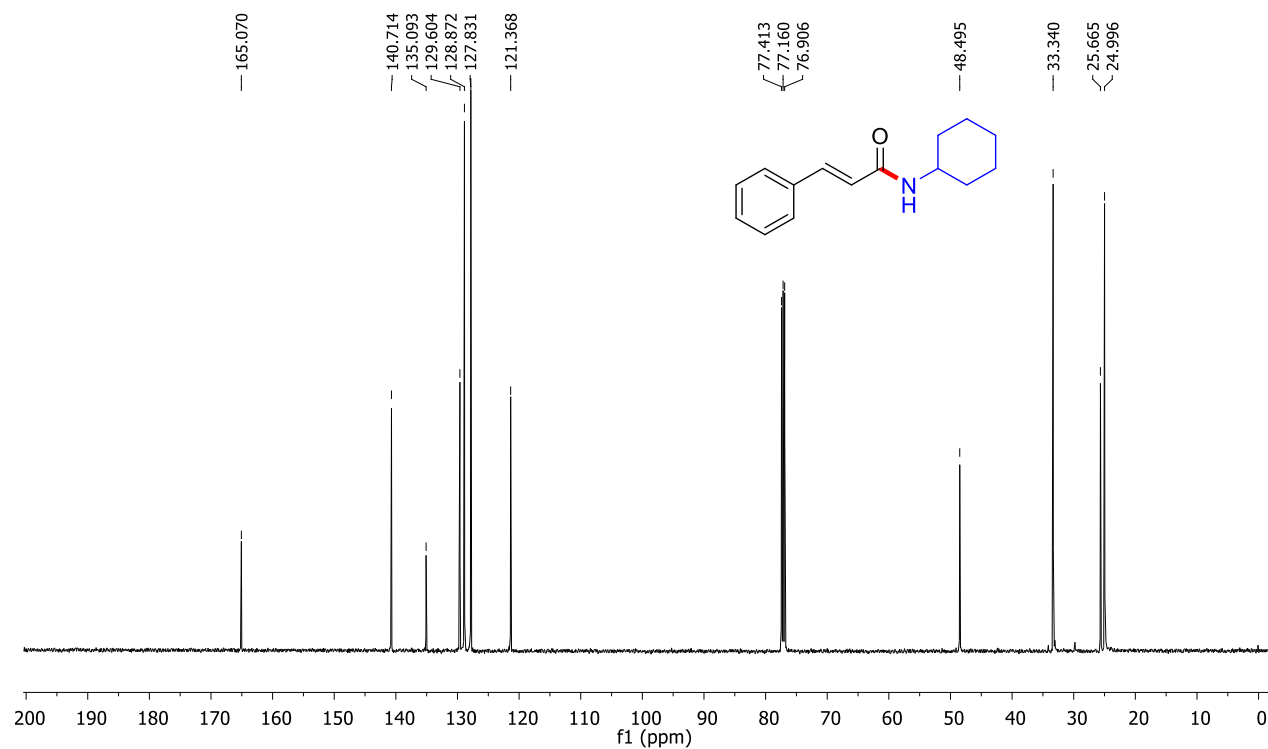

## 4. Copies of HRMS Spectra of the Unknown Products 3.

### (*E*)-3-(3,4-Dichlorophenyl)-*N*-phenylacrylamide (3h):

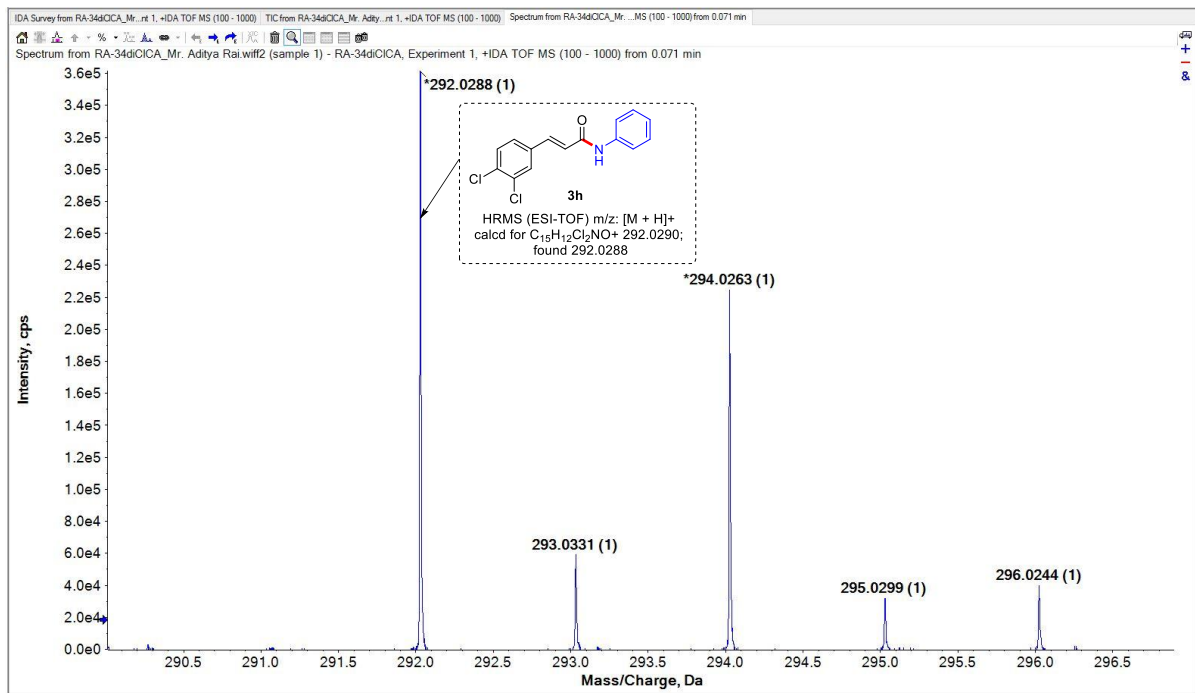

### (*E*)-3-(3-Methoxyphenyl)-*N*-phenylacrylamide (3i):

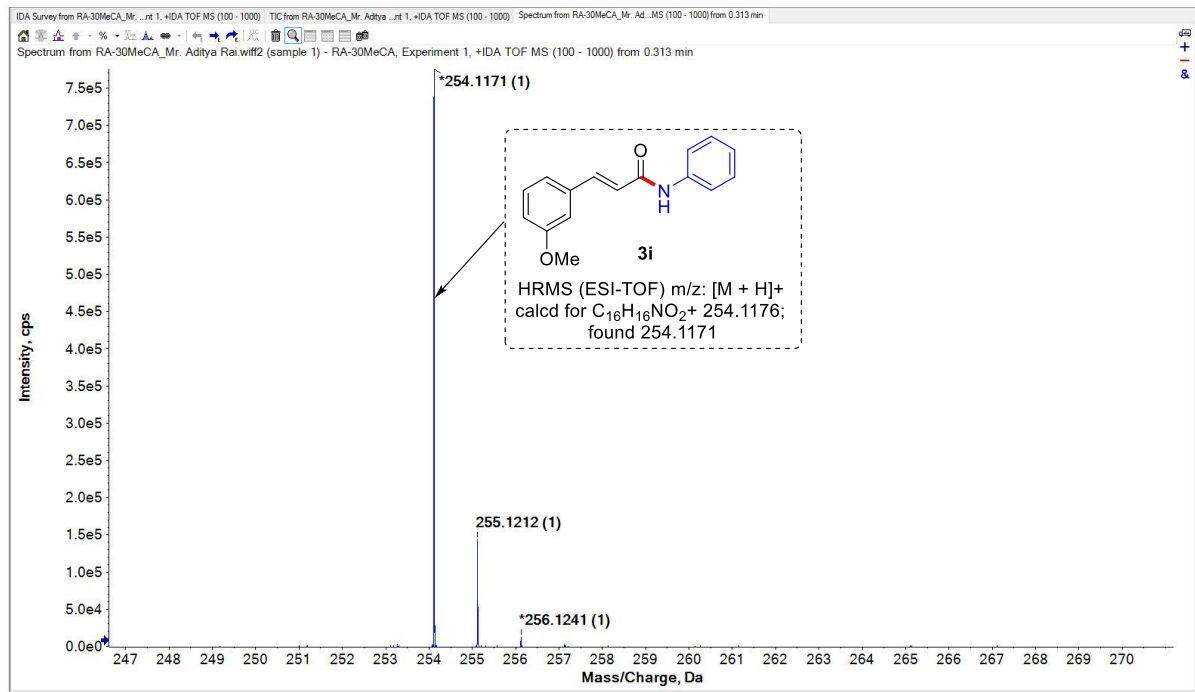

### (E)-N-Phenyl-3-(3-(trifluoromethyl)phenyl)acrylamide (3j):

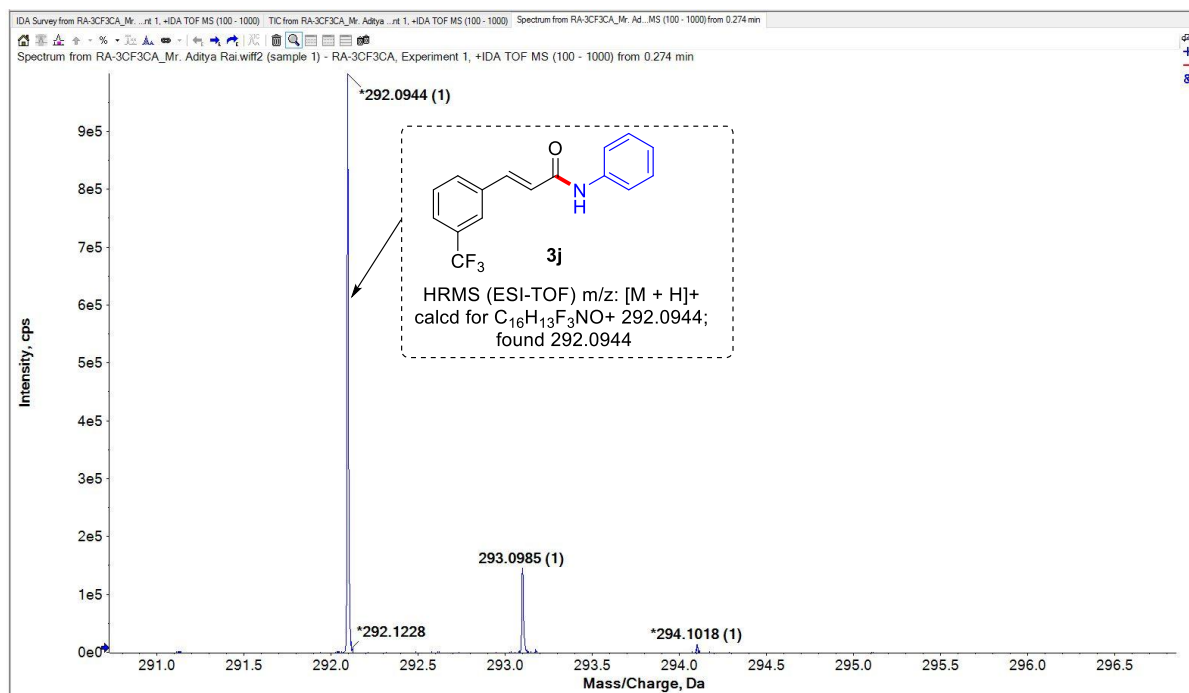

### (E)-3-(2-Chlorophenyl)-N-phenylacrylamide (3m):

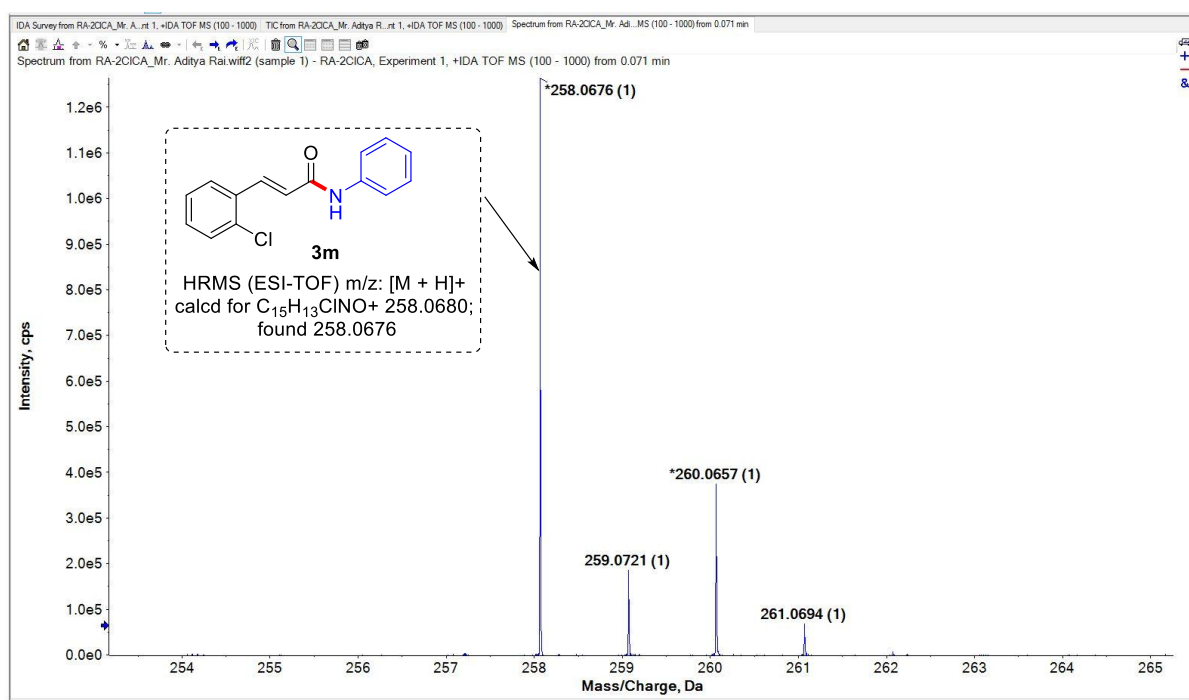

### (E)-N-Phenyl-3-(2-(trifluoromethyl)phenyl)acrylamide (3n):

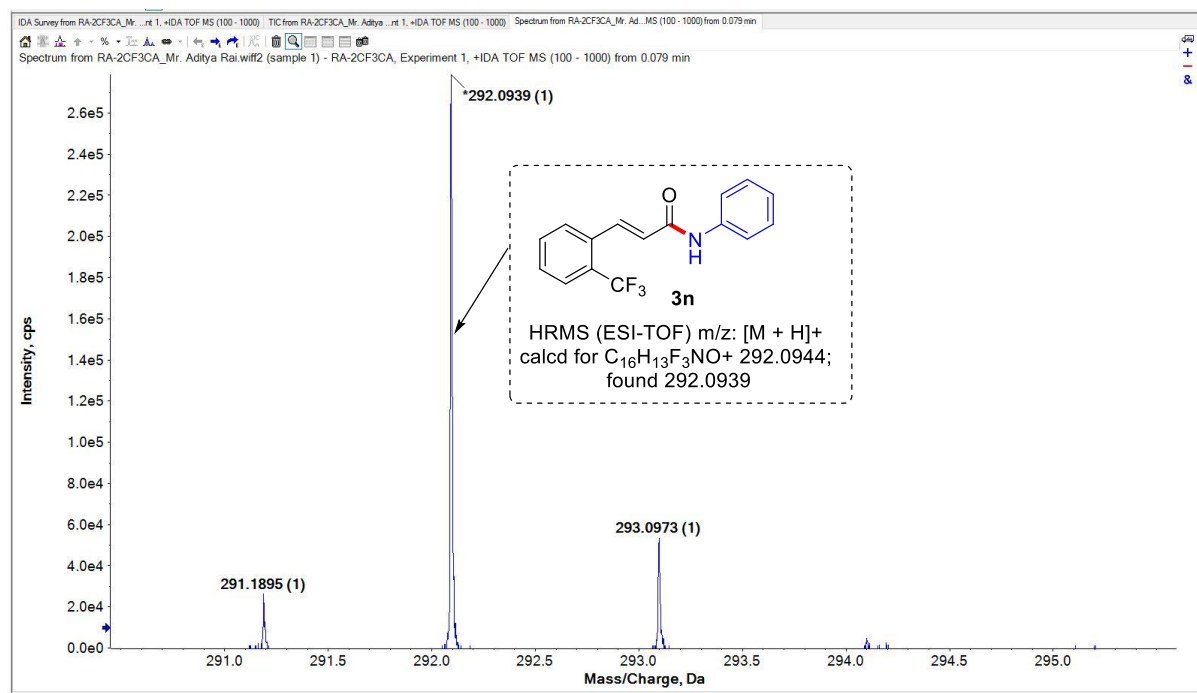

### (E)-N-Phenyl-2-octenamide (3s):

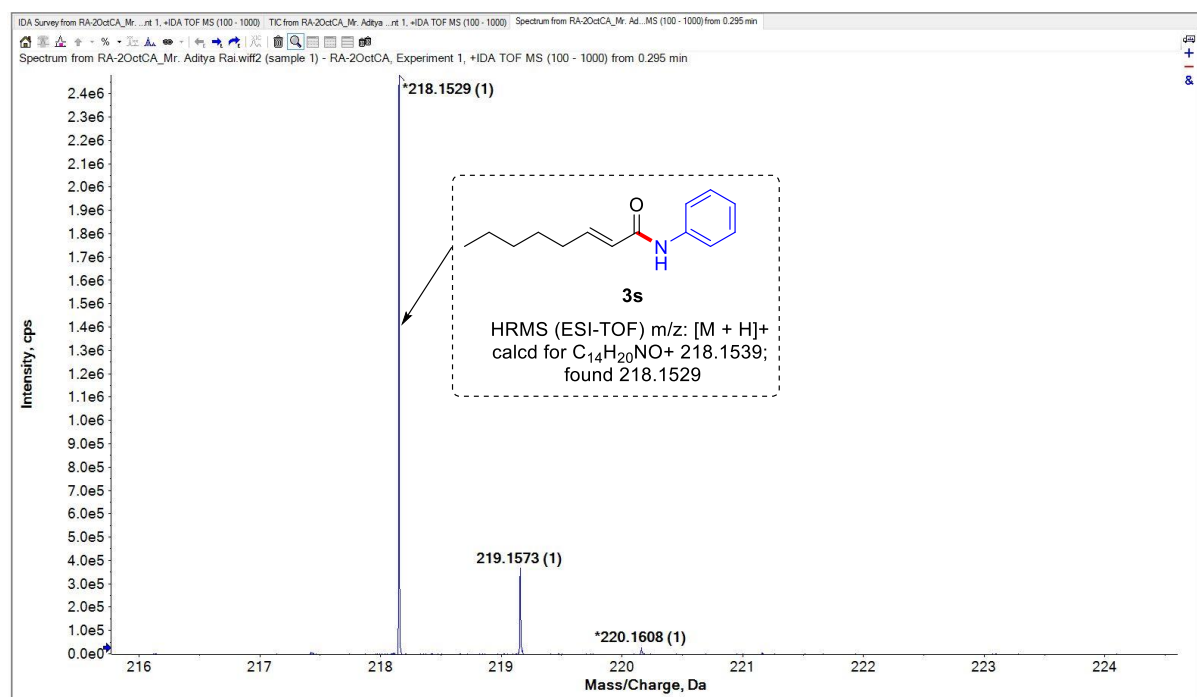

## *N*-(4-(*Tert*-butyl)phenyl)cinnamamide (**3u**):

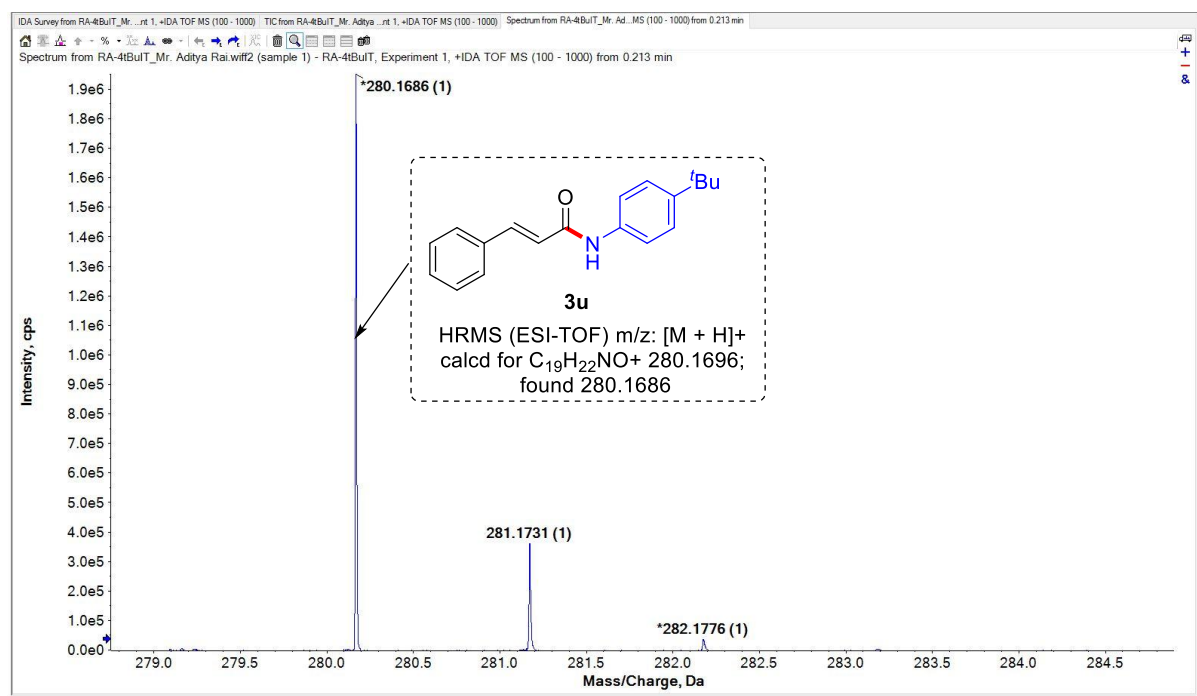

## *N*-Benzylcinnamamide (**3ab**):

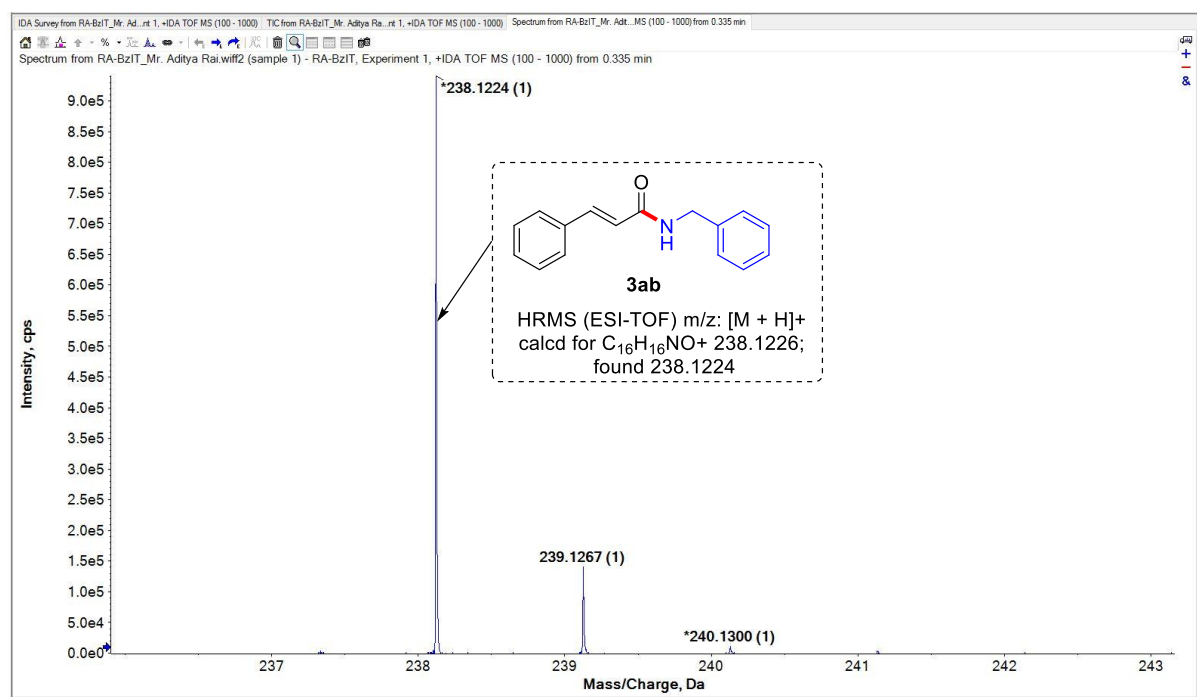

## N-Phenethylcinnamamide (3ac):

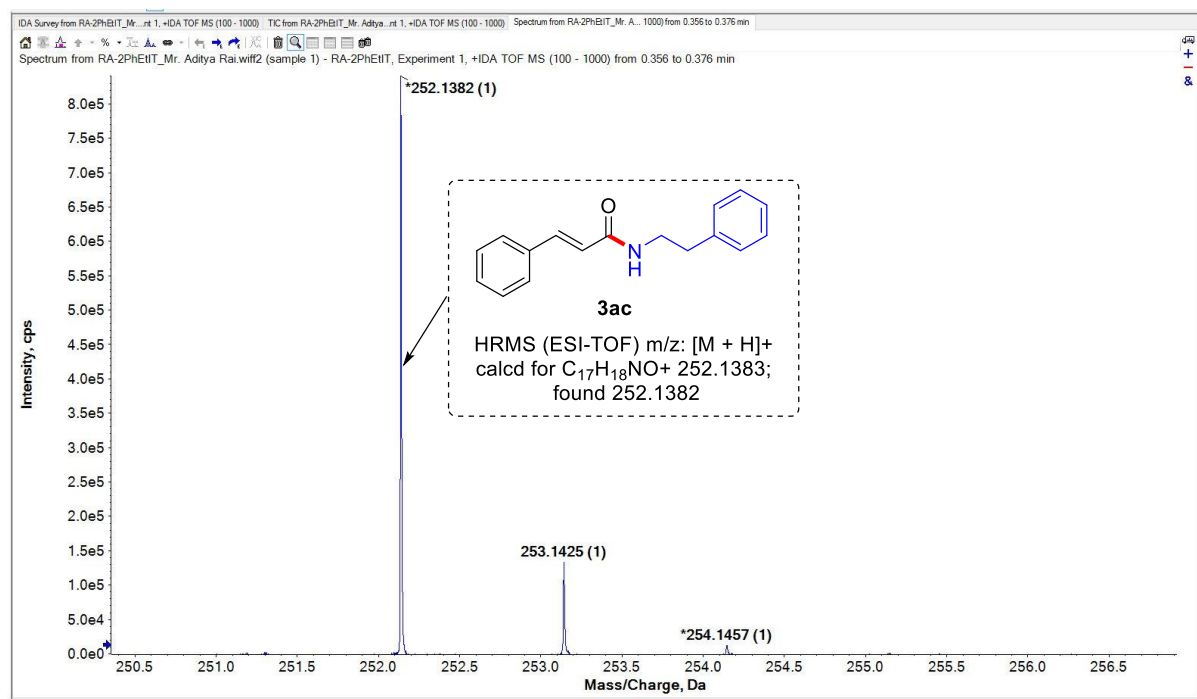

## N-Cyclohexylcinnamamide (3ad):

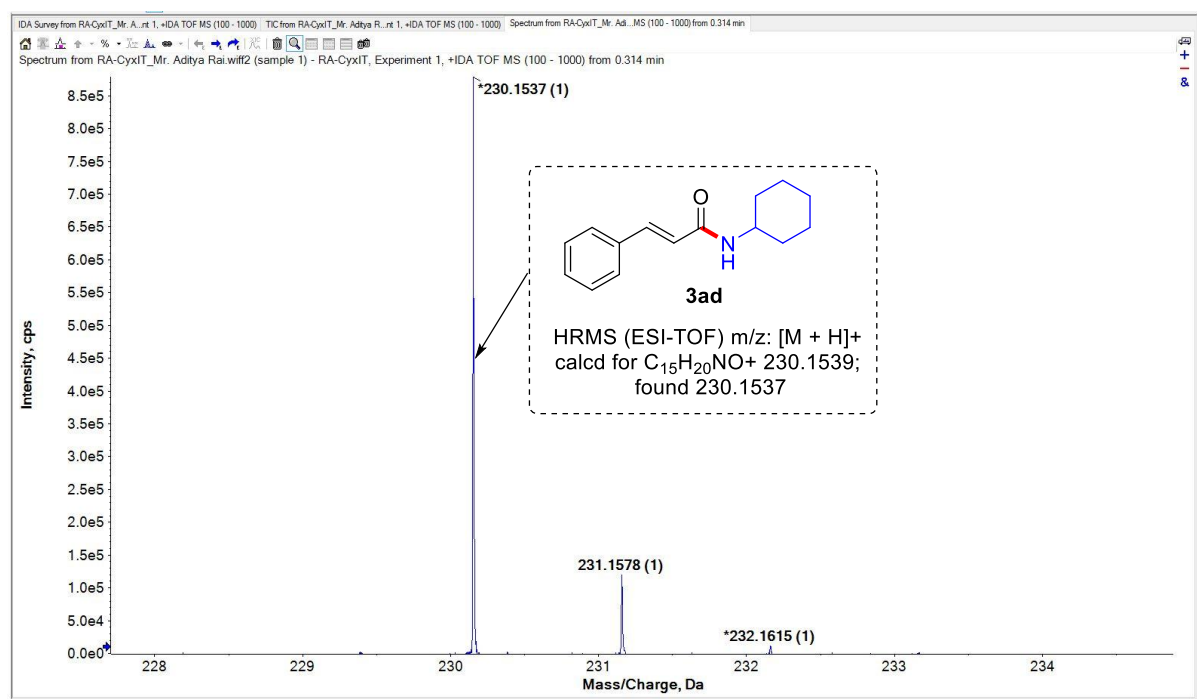

## 5. HRMS Spectra of the Intermediate B.

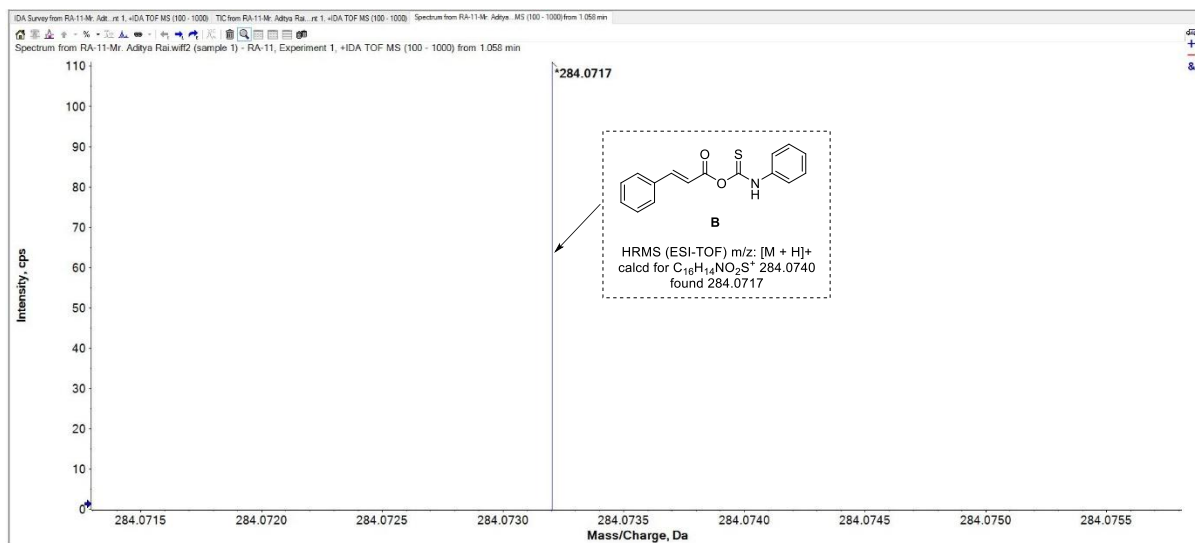

## 6. HRMS Spectra of the Carbonyl Sulfide.

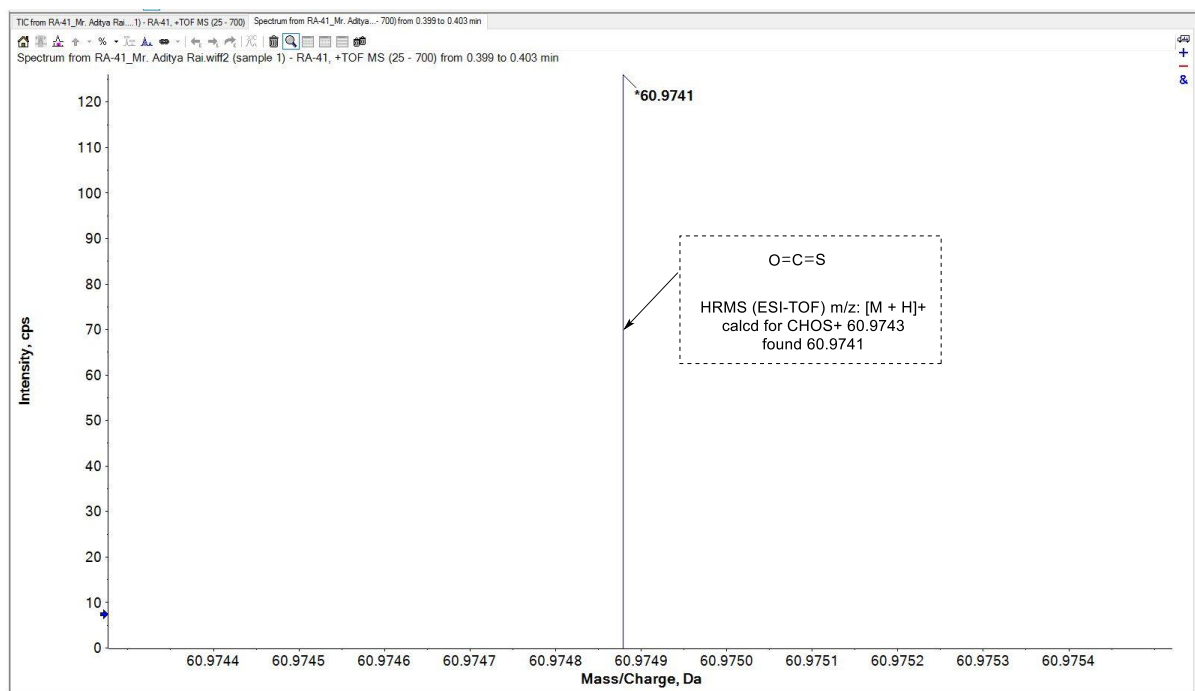

## 7. Crystallographic Data of the Product 3f.

Crystal of the product **3f** was grown by slow evaporation of a solution of the compound in CDCl<sub>3</sub>.

**Specification:** Single crystal X-ray data of the compound was collected on the XtaLAB Synergy, Dualflex, HyPix3000 HPAD detector using Cu-K $\alpha$  ( $\lambda = 1.54184 \text{ \AA}$ ) radiation source. The structure was solved using SHELXT-2018/2 and was refined by full-matrix least-squares procedures using the SHELXL-2019/3 software package through the OLEX2 suite.

|                                             |                                                   |
|---------------------------------------------|---------------------------------------------------|
| Crystallized from                           | Chloroform                                        |
| Empirical formula                           | C <sub>15</sub> H <sub>12</sub> ClNO              |
| Formula weight [g mol <sup>-1</sup> ]       | 257.71                                            |
| Crystal color, habit                        | Light Yellow, Needle                              |
| Crystal dimensions/mm <sup>3</sup>          | 0.16 × 0.14 × 0.13                                |
| Temperature [K]                             | 293(2)                                            |
| Crystal system                              | Orthorhombic                                      |
| Space group                                 | <i>Pbca</i>                                       |
| a/Å                                         | 12.4472(2)                                        |
| b/Å                                         | 9.62130(10)                                       |
| c/Å                                         | 21.8930(2)                                        |
| $\alpha$ /°                                 | 90°                                               |
| $\beta$ /°                                  | 90°                                               |
| $\gamma$ /°                                 | 90°                                               |
| V[Å <sup>3</sup> ]                          | 2621.87(6)                                        |
| Z                                           | 8                                                 |
| $\rho$ [g/cm <sup>3</sup> ]                 | 1.306                                             |
| $\mu$ [mm <sup>-1</sup> ]                   | 2.463                                             |
| F(000)                                      | 1072                                              |
| Radiation                                   | Cu-K $\alpha$ ( $\lambda = 1.54184 \text{ \AA}$ ) |
| $\Theta$ range for data collection/°        | 4.038 to 68.102°                                  |
| Index ranges                                | -14 ≤ h ≤ 14, -11 ≤ k ≤ 8, -26 ≤ l ≤ 26           |
| Reflections collected                       | 23950                                             |
| Independent reflections                     | 2385 [R(int) = 0.0289]                            |
| Data/restraints/parameters                  | 2385/0/167                                        |
| Goodness-of-fit on F <sup>2</sup>           | 0.915                                             |
| Final R indexes [ $I \geq 2\sigma(I)$ ]     | R <sub>1</sub> = 0.0345, wR <sub>2</sub> = 0.1063 |
| Final R indexes [all data]                  | R <sub>1</sub> = 0.0398, wR <sub>2</sub> = 0.1128 |
| Largest diff. peak/hole / e Å <sup>-3</sup> | 0.124/-0.253                                      |

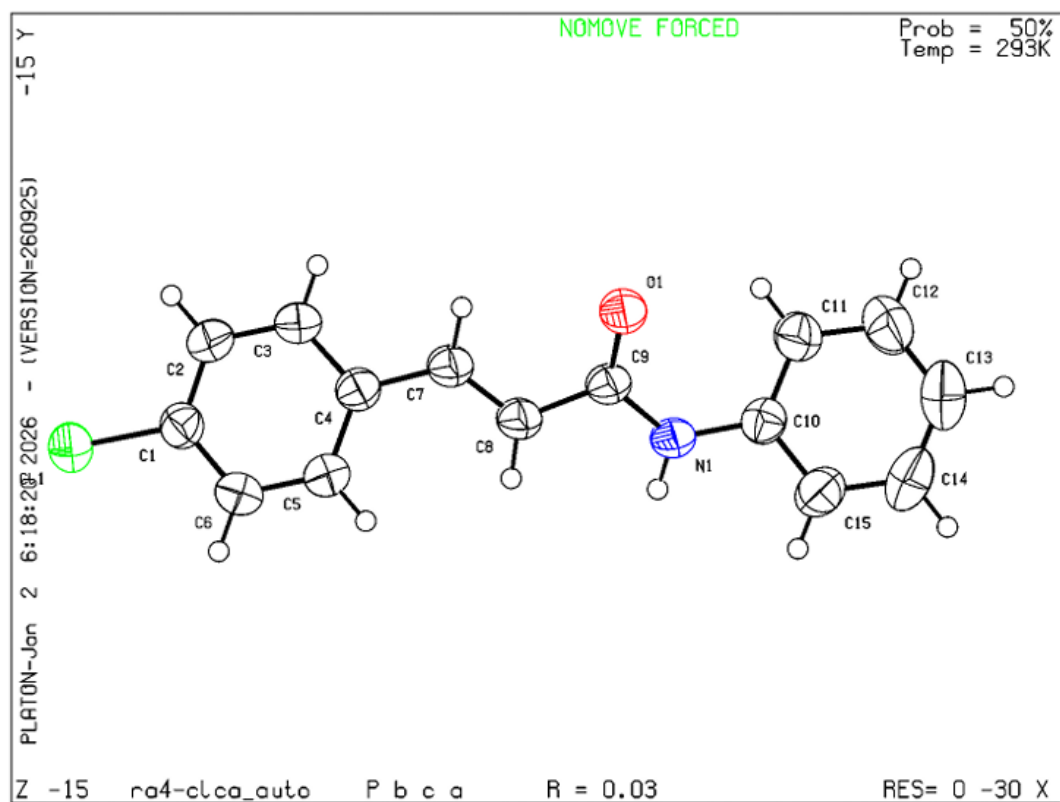

**Figure S1:** View of the molecular structure of the product **3f**. Displacement ellipsoids are drawn at the 50% probability level.

## 8. Procedure for Gram Scale Preparation of the Product **3a**.

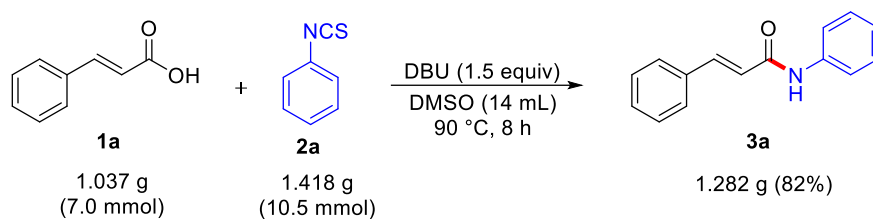

A mixture of cinnamic acid **1a** (1.037 g, 7.0 mmol), phenyl isothiocyanate **2a** (1.418 g, 10.5 mmol), DBU (1.5 equiv), and DMSO (14 mL), contained in a 100-mL round-bottom flask, was stirred at 90 °C in an oil bath for 8 h. After completion of the reaction (monitored through TLC), a saturated aqueous NaHCO<sub>3</sub> solution (30 mL) was added to the reaction mixture, which was then extracted with ethyl acetate (3×30 mL). The combined organic phase was dried over anhydrous Na<sub>2</sub>SO<sub>4</sub>, filtered, and concentrated under reduced pressure. The resulting crude product was finally purified by silica gel column chromatography using *n*-hexane and ethyl acetate as eluent to afford the product **3a** (1.282 g, 82%).
